# Supplementary material for: Downregulation of the let-7 family of microRNAs may promote insulin receptor/insulin-like growth factor signalling pathways in pancreatic ductal adenocarcinoma
Source: PubMed Central journal article supplement — Oncol Lett. 2020 Jul 10;20(3):2613–20. doi: 10.3892/ol.2020.11854 (PMC7400736; doi:10.3892/ol.2020.11854), 2020-07-10
Supplement: Supplementary_Data.pdf [file Supplementary_Data.pdf]

Table SI. Groups of patients with pancreatic ductal adenocarcinoma and survival time. Group 1, patients with resectable, non-metastatic disease; Group 2, patients with non-resectable disease without evidence of metastases; Group 3 patients with metastatic disease.

| Group | Survival time, months |      |     |
|-------|-----------------------|------|-----|
|       | <6                    | 6-12 | >12 |
| 1     | 3                     | 0    | 12  |
| 2     | 5                     | 11   | 41  |
| 3     | 27                    | 9    | 4   |

Group 1, patients with resectable, non-metastatic disease.  
Group 2, patients with non-resectable disease without evidence of metastases. Group 3, patients with metastatic disease.

Table SII. miRNA expression comparison of pancreatic ductal adenocarcinoma patients (PDAC) vs. control group (CG).

| miRNA           | P-value               | FDR corrected P-value | Fold-change in log <sub>2</sub> scale |
|-----------------|-----------------------|-----------------------|---------------------------------------|
| hsa-miR-135b-5p | 3.74x10 <sup>-6</sup> | 4.04x10 <sup>-5</sup> | 1.935                                 |
| hsa-miR-621     | 2.73x10 <sup>-4</sup> | 9.25x10 <sup>-4</sup> | 1.414                                 |
| hsa-miR-34a-3p  | 5.57x10 <sup>-6</sup> | 5.05x10 <sup>-5</sup> | 1.256                                 |
| hsa-miR-573     | 5.56x10 <sup>-3</sup> | 1.18x10 <sup>-2</sup> | 1.248                                 |
| hsa-miR-144-3p  | 2.69x10 <sup>-4</sup> | 9.25x10 <sup>-4</sup> | 1.231                                 |
| hsa-miR-4257    | 7.75x10 <sup>-3</sup> | 1.52x10 <sup>-2</sup> | 1.223                                 |
| hsa-miR-518b    | 1.18x10 <sup>-2</sup> | 2.15x10 <sup>-2</sup> | 1.196                                 |
| hsa-miR-196a-5p | 1.21x10 <sup>-4</sup> | 5.46x10 <sup>-4</sup> | 1.188                                 |
| hsa-miR-193b-3p | 1.51x10 <sup>-4</sup> | 6.24x10 <sup>-4</sup> | 1.187                                 |
| hsa-miR-365a-3p | 3.87x10 <sup>-5</sup> | 2.29x10 <sup>-4</sup> | 1.179                                 |
| hsa-miR-95-3p   | 6.71x10 <sup>-6</sup> | 5.66x10 <sup>-5</sup> | 1.167                                 |
| hsa-miR-451a    | 1.33x10 <sup>-4</sup> | 5.73x10 <sup>-4</sup> | 1.132                                 |
| hsa-miR-1290    | 3.97x10 <sup>-4</sup> | 1.28x10 <sup>-3</sup> | 1.117                                 |
| hsa-miR-34b-3p  | 2.41x10 <sup>-3</sup> | 5.95x10 <sup>-3</sup> | 1.073                                 |
| hsa-miR-596     | 9.11x10 <sup>-3</sup> | 1.72x10 <sup>-2</sup> | 1.060                                 |
| hsa-miR-194-5p  | 1.28x10 <sup>-4</sup> | 5.60x10 <sup>-4</sup> | 1.049                                 |
| hsa-miR-1825    | 6.61x10 <sup>-3</sup> | 1.35x10 <sup>-2</sup> | 1.027                                 |
| hsa-miR-183-5p  | 1.30x10 <sup>-3</sup> | 3.55x10 <sup>-3</sup> | 1.011                                 |
| hsa-miR-455-5p  | 2.35x10 <sup>-2</sup> | 3.91x10 <sup>-2</sup> | 0.980                                 |
| hsa-miR-1291    | 7.60x10 <sup>-4</sup> | 2.27x10 <sup>-3</sup> | 0.979                                 |
| hsa-miR-192-5p  | 5.54x10 <sup>-4</sup> | 1.71x10 <sup>-3</sup> | 0.955                                 |
| hsa-miR-34a-5p  | 2.88x10 <sup>-4</sup> | 9.64x10 <sup>-4</sup> | 0.923                                 |
| hsa-miR-363-3p  | 1.00x10 <sup>-6</sup> | 1.41x10 <sup>-5</sup> | 0.921                                 |
| hsa-miR-365b-5p | 1.50x10 <sup>-2</sup> | 2.62x10 <sup>-2</sup> | 0.918                                 |
| hsa-miR-1207-5p | 1.89x10 <sup>-2</sup> | 3.20x10 <sup>-2</sup> | 0.914                                 |
| hsa-miR-616-3p  | 1.48x10 <sup>-3</sup> | 3.95x10 <sup>-3</sup> | 0.895                                 |
| hsa-miR-96-5p   | 1.06x10 <sup>-2</sup> | 1.96x10 <sup>-2</sup> | 0.871                                 |
| hsa-miR-609     | 2.77x10 <sup>-2</sup> | 4.54x10 <sup>-2</sup> | 0.869                                 |
| hsa-miR-429     | 4.87x10 <sup>-4</sup> | 1.52x10 <sup>-3</sup> | 0.855                                 |
| hsa-miR-215-5p  | 3.46x10 <sup>-3</sup> | 7.92x10 <sup>-3</sup> | 0.847                                 |
| hsa-miR-650     | 4.23x10 <sup>-2</sup> | 6.50x10 <sup>-2</sup> | 0.843                                 |
| hsa-miR-193a-5p | 9.10x10 <sup>-3</sup> | 1.72x10 <sup>-2</sup> | 0.822                                 |
| hsa-miR-29c-3p  | 4.00E-11              | 2.81x10 <sup>-9</sup> | 0.817                                 |
| hsa-miR-483-5p  | 2.04x10 <sup>-2</sup> | 3.41x10 <sup>-2</sup> | 0.815                                 |
| hsa-miR-1275    | 5.94x10 <sup>-3</sup> | 1.24x10 <sup>-2</sup> | 0.815                                 |
| hsa-miR-4732-3p | 6.28x10 <sup>-3</sup> | 1.31x10 <sup>-2</sup> | 0.808                                 |
| hsa-miR-200b-3p | 3.38x10 <sup>-3</sup> | 7.84x10 <sup>-3</sup> | 0.791                                 |
| hsa-miR-483-3p  | 1.46x10 <sup>-2</sup> | 2.58x10 <sup>-2</sup> | 0.790                                 |
| hsa-miR-20b-5p  | 4.95x10 <sup>-5</sup> | 2.84x10 <sup>-4</sup> | 0.790                                 |
| hsa-miR-620     | 2.95x10 <sup>-2</sup> | 4.82x10 <sup>-2</sup> | 0.770                                 |
| hsa-miR-101-3p  | 1.13x10 <sup>-5</sup> | 7.92x10 <sup>-5</sup> | 0.760                                 |
| hsa-miR-660-5p  | 2.20x10 <sup>-5</sup> | 1.42x10 <sup>-4</sup> | 0.750                                 |
| hsa-miR-378a-3p | 1.02x10 <sup>-5</sup> | 7.77x10 <sup>-5</sup> | 0.742                                 |
| hsa-miR-196b-3p | 6.24x10 <sup>-5</sup> | 3.37x10 <sup>-4</sup> | 0.737                                 |
| hsa-miR-99a-5p  | 4.43x10 <sup>-3</sup> | 9.59x10 <sup>-3</sup> | 0.716                                 |
| hsa-miR-486-5p  | 2.37x10 <sup>-3</sup> | 5.89x10 <sup>-3</sup> | 0.709                                 |
| hsa-miR-16-5p   | 1.02x10 <sup>-4</sup> | 4.96x10 <sup>-4</sup> | 0.707                                 |
| hsa-miR-362-3p  | 1.96x10 <sup>-4</sup> | 7.44x10 <sup>-4</sup> | 0.676                                 |
| hsa-miR-25-3p   | 2.16x10 <sup>-4</sup> | 8.10x10 <sup>-4</sup> | 0.653                                 |
| hsa-miR-216a-5p | 8.73x10 <sup>-2</sup> | 1.22x10 <sup>-1</sup> | 0.648                                 |
| hsa-miR-29a-3p  | 1.13x10 <sup>-5</sup> | 7.92x10 <sup>-5</sup> | 0.644                                 |
| hsa-miR-576-5p  | 3.83x10 <sup>-7</sup> | 6.72x10 <sup>-6</sup> | 0.631                                 |
| hsa-miR-25-5p   | 2.90x10 <sup>-3</sup> | 7.08x10 <sup>-3</sup> | 0.629                                 |
| hsa-miR-200c-5p | 1.46x10 <sup>-1</sup> | 1.91x10 <sup>-1</sup> | 0.621                                 |

Table SII. Continued.

| miRNA             | P-value               | FDR corrected P-value | Fold-change in log <sub>2</sub> scale |
|-------------------|-----------------------|-----------------------|---------------------------------------|
| hsa-miR-10a-3p    | 3.12x10 <sup>-3</sup> | 7.43x10 <sup>-3</sup> | 0.621                                 |
| hsa-miR-502-3p    | 1.04x10 <sup>-4</sup> | 4.98x10 <sup>-4</sup> | 0.620                                 |
| hsa-miR-206       | 1.65x10 <sup>-1</sup> | 2.09x10 <sup>-1</sup> | 0.607                                 |
| hsa-miR-1285-3p   | 8.81x10 <sup>-8</sup> | 2.48x10 <sup>-6</sup> | 0.606                                 |
| hsa-miR-15a-5p    | 3.91x10 <sup>-5</sup> | 2.29x10 <sup>-4</sup> | 0.599                                 |
| hsa-let-7b-3p     | 8.57x10 <sup>-5</sup> | 4.33x10 <sup>-4</sup> | 0.591                                 |
| hsa-miR-15b-3p    | 2.85x10 <sup>-6</sup> | 3.21x10 <sup>-5</sup> | 0.591                                 |
| hsa-miR-378a-5p   | 1.97x10 <sup>-5</sup> | 1.32x10 <sup>-4</sup> | 0.590                                 |
| hsa-miR-10b-5p    | 5.20x10 <sup>-2</sup> | 7.74x10 <sup>-2</sup> | 0.578                                 |
| hsa-miR-4306      | 1.62x10 <sup>-6</sup> | 2.07x10 <sup>-5</sup> | 0.573                                 |
| hsa-miR-125b-5p   | 1.42x10 <sup>-2</sup> | 2.53x10 <sup>-2</sup> | 0.568                                 |
| hsa-miR-205-5p    | 1.28x10 <sup>-1</sup> | 1.70x10 <sup>-1</sup> | 0.565                                 |
| hsa-miR-101-5p    | 2.27x10 <sup>-4</sup> | 8.33x10 <sup>-4</sup> | 0.563                                 |
| hsa-miR-214-3p    | 1.09x10 <sup>-1</sup> | 1.49x10 <sup>-1</sup> | 0.553                                 |
| hsa-miR-92a-3p    | 1.57x10 <sup>-4</sup> | 6.29x10 <sup>-4</sup> | 0.531                                 |
| hsa-miR-616-5p    | 3.50x10 <sup>-3</sup> | 7.94x10 <sup>-3</sup> | 0.529                                 |
| hsa-miR-627-5p    | 7.71x10 <sup>-5</sup> | 4.01x10 <sup>-4</sup> | 0.527                                 |
| hsa-miR-651-5p    | 2.61x10 <sup>-4</sup> | 9.21x10 <sup>-4</sup> | 0.521                                 |
| hsa-miR-34b-5p    | 8.90x10 <sup>-2</sup> | 1.24x10 <sup>-1</sup> | 0.520                                 |
| hsa-miR-375       | 1.74x10 <sup>-1</sup> | 2.18x10 <sup>-1</sup> | 0.516                                 |
| hsa-miR-150-5p    | 6.22x10 <sup>-2</sup> | 8.96x10 <sup>-2</sup> | 0.511                                 |
| hsa-miR-532-5p    | 1.54x10 <sup>-4</sup> | 6.28x10 <sup>-4</sup> | 0.499                                 |
| hsa-miR-141-3p    | 3.52x10 <sup>-2</sup> | 5.53x10 <sup>-2</sup> | 0.487                                 |
| hsa-miR-454-5p    | 5.33x10 <sup>-5</sup> | 2.99x10 <sup>-4</sup> | 0.485                                 |
| hsa-miR-1299      | 1.53x10 <sup>-1</sup> | 1.98x10 <sup>-1</sup> | 0.475                                 |
| hsa-miR-19b-3p    | 5.35x10 <sup>-6</sup> | 5.01x10 <sup>-5</sup> | 0.466                                 |
| hsa-miR-19a-3p    | 3.35x10 <sup>-5</sup> | 2.04x10 <sup>-4</sup> | 0.442                                 |
| hsa-miR-579-3p    | 2.95x10 <sup>-3</sup> | 7.15x10 <sup>-3</sup> | 0.434                                 |
| hsa-let-7a-3p     | 1.83x10 <sup>-3</sup> | 4.71x10 <sup>-3</sup> | 0.421                                 |
| hsa-miR-629-5p    | 3.65x10 <sup>-3</sup> | 8.15x10 <sup>-3</sup> | 0.416                                 |
| hsa-miR-550a-5p   | 4.37x10 <sup>-3</sup> | 9.51x10 <sup>-3</sup> | 0.413                                 |
| hsa-miR-29b-3p    | 2.97x10 <sup>-4</sup> | 9.81x10 <sup>-4</sup> | 0.408                                 |
| hsa-miR-497-5p    | 7.00x10 <sup>-3</sup> | 1.40x10 <sup>-2</sup> | 0.397                                 |
| hsa-let-7g-3p     | 6.61x10 <sup>-3</sup> | 1.35x10 <sup>-2</sup> | 0.389                                 |
| hsa-miR-20a-5p    | 7.44x10 <sup>-5</sup> | 3.95x10 <sup>-4</sup> | 0.384                                 |
| hsa-miR-22-3p     | 2.62x10 <sup>-4</sup> | 9.21x10 <sup>-4</sup> | 0.384                                 |
| hsa-miR-770-5p    | 1.40x10 <sup>-1</sup> | 1.85x10 <sup>-1</sup> | 0.381                                 |
| hsa-miR-10a-5p    | 1.14x10 <sup>-2</sup> | 2.11x10 <sup>-2</sup> | 0.376                                 |
| hsa-miR-185-5p    | 6.06x10 <sup>-5</sup> | 3.34x10 <sup>-4</sup> | 0.355                                 |
| hsa-miR-30a-5p    | 4.98x10 <sup>-2</sup> | 7.45x10 <sup>-2</sup> | 0.352                                 |
| hsa-miR-181a-5p   | 1.61x10 <sup>-4</sup> | 6.29x10 <sup>-4</sup> | 0.348                                 |
| hsa-miR-148a-3p   | 6.65x10 <sup>-3</sup> | 1.35x10 <sup>-2</sup> | 0.347                                 |
| hsa-miR-132-3p    | 4.55x10 <sup>-3</sup> | 9.76x10 <sup>-3</sup> | 0.332                                 |
| hsa-miR-199b-5p   | 4.88x10 <sup>-2</sup> | 7.34x10 <sup>-2</sup> | 0.329                                 |
| hsa-miR-181a-2-3p | 8.07x10 <sup>-4</sup> | 2.34x10 <sup>-3</sup> | 0.323                                 |
| hsa-miR-181b-5p   | 1.20x10 <sup>-2</sup> | 2.17x10 <sup>-2</sup> | 0.320                                 |
| hsa-miR-150-3p    | 2.14x10 <sup>-1</sup> | 2.67x10 <sup>-1</sup> | 0.318                                 |
| hsa-miR-29c-5p    | 6.39x10 <sup>-6</sup> | 5.61x10 <sup>-5</sup> | 0.298                                 |
| hsa-miR-500a-5p   | 3.22x10 <sup>-2</sup> | 5.14x10 <sup>-2</sup> | 0.291                                 |
| hsa-miR-874-3p    | 1.70x10 <sup>-1</sup> | 2.15x10 <sup>-1</sup> | 0.290                                 |
| hsa-miR-500a-3p   | 9.97x10 <sup>-3</sup> | 1.87x10 <sup>-2</sup> | 0.287                                 |
| hsa-miR-140-3p    | 3.40x10 <sup>-3</sup> | 7.84x10 <sup>-3</sup> | 0.281                                 |
| hsa-miR-589-5p    | 3.27x10 <sup>-3</sup> | 7.70x10 <sup>-3</sup> | 0.272                                 |
| hsa-miR-106b-5p   | 1.20x10 <sup>-2</sup> | 2.17x10 <sup>-2</sup> | 0.258                                 |
| hsa-miR-29b-2-5p  | 7.25x10 <sup>-3</sup> | 1.44x10 <sup>-2</sup> | 0.256                                 |

Table SII. Continued.

| miRNA              | P-value               | FDR corrected<br>P-value | Fold-change<br>in log <sub>2</sub> scale |
|--------------------|-----------------------|--------------------------|------------------------------------------|
| hsa-miR-195-5p     | 1.90x10 <sup>-2</sup> | 3.20x10 <sup>-2</sup>    | 0.253                                    |
| hsa-miR-211-5p     | 2.22x10 <sup>-1</sup> | 2.72x10 <sup>-1</sup>    | 0.253                                    |
| hsa-miR-17-3p      | 1.57x10 <sup>-2</sup> | 2.73x10 <sup>-2</sup>    | 0.242                                    |
| hsa-miR-320a       | 3.32x10 <sup>-2</sup> | 5.24x10 <sup>-2</sup>    | 0.232                                    |
| hsa-miR-30e-5p     | 1.11x10 <sup>-4</sup> | 5.19x10 <sup>-4</sup>    | 0.224                                    |
| hsa-miR-501-5p     | 1.18x10 <sup>-1</sup> | 1.58x10 <sup>-1</sup>    | 0.220                                    |
| hsa-let-7f-1-3p    | 6.11x10 <sup>-2</sup> | 8.85x10 <sup>-2</sup>    | 0.210                                    |
| hsa-miR-1271-5p    | 9.78x10 <sup>-2</sup> | 1.35x10 <sup>-1</sup>    | 0.209                                    |
| hsa-miR-320e       | 1.61x10 <sup>-1</sup> | 2.06x10 <sup>-1</sup>    | 0.204                                    |
| hsa-miR-532-3p     | 3.81x10 <sup>-2</sup> | 5.95x10 <sup>-2</sup>    | 0.196                                    |
| hsa-miR-21-5p      | 8.55x10 <sup>-2</sup> | 1.21x10 <sup>-1</sup>    | 0.195                                    |
| hsa-miR-720 (v18)  | 4.82x10 <sup>-1</sup> | 5.29x10 <sup>-1</sup>    | 0.182                                    |
| hsa-miR-320d       | 8.66x10 <sup>-2</sup> | 1.22x10 <sup>-1</sup>    | 0.176                                    |
| hsa-miR-324-3p     | 3.12x10 <sup>-2</sup> | 5.04x10 <sup>-2</sup>    | 0.163                                    |
| hsa-miR-331-5p     | 4.63x10 <sup>-2</sup> | 7.03x10 <sup>-2</sup>    | 0.162                                    |
| hsa-let-7f-2-3p    | 3.52x10 <sup>-1</sup> | 4.12x10 <sup>-1</sup>    | 0.157                                    |
| hsa-miR-345-5p     | 1.11x10 <sup>-1</sup> | 1.51x10 <sup>-1</sup>    | 0.150                                    |
| hsa-miR-186-5p     | 4.04x10 <sup>-4</sup> | 1.28x10 <sup>-3</sup>    | 0.144                                    |
| hsa-miR-204-5p     | 4.30x10 <sup>-1</sup> | 4.82x10 <sup>-1</sup>    | 0.142                                    |
| hsa-miR-484        | 1.45x10 <sup>-1</sup> | 1.90x10 <sup>-1</sup>    | 0.134                                    |
| hsa-let-7b-5p      | 1.48x10 <sup>-1</sup> | 1.93x10 <sup>-1</sup>    | 0.131                                    |
| hsa-miR-450a-5p    | 3.94x10 <sup>-1</sup> | 4.47x10 <sup>-1</sup>    | 0.131                                    |
| hsa-miR-138-5p     | 4.16x10 <sup>-1</sup> | 4.70x10 <sup>-1</sup>    | 0.123                                    |
| hsa-miR-27a-5p     | 5.09x10 <sup>-1</sup> | 5.55x10 <sup>-1</sup>    | 0.119                                    |
| hsa-miR-320b       | 3.19x10 <sup>-1</sup> | 3.79x10 <sup>-1</sup>    | 0.117                                    |
| hsa-miR-423-5p     | 2.16x10 <sup>-1</sup> | 2.67x10 <sup>-1</sup>    | 0.116                                    |
| hsa-miR-9-3p       | 4.71x10 <sup>-1</sup> | 5.20x10 <sup>-1</sup>    | 0.114                                    |
| hsa-miR-320c       | 2.57x10 <sup>-1</sup> | 3.09x10 <sup>-1</sup>    | 0.114                                    |
| hsa-miR-30d-3p     | 4.42x10 <sup>-1</sup> | 4.93x10 <sup>-1</sup>    | 0.113                                    |
| hsa-miR-15a-3p     | 2.05x10 <sup>-1</sup> | 2.56x10 <sup>-1</sup>    | 0.111                                    |
| hsa-miR-29a-5p     | 4.67x10 <sup>-1</sup> | 5.16x10 <sup>-1</sup>    | 0.106                                    |
| hsa-miR-505-3p     | 3.51x10 <sup>-1</sup> | 4.12x10 <sup>-1</sup>    | 0.104                                    |
| hsa-miR-342-5p     | 5.24x10 <sup>-1</sup> | 5.69x10 <sup>-1</sup>    | 0.101                                    |
| hsa-miR-590-5p     | 2.29x10 <sup>-1</sup> | 2.78x10 <sup>-1</sup>    | 0.099                                    |
| hsa-miR-629-3p     | 4.31x10 <sup>-1</sup> | 4.82x10 <sup>-1</sup>    | 0.098                                    |
| hsa-miR-148a-5p    | 5.03x10 <sup>-1</sup> | 5.50x10 <sup>-1</sup>    | 0.095                                    |
| hsa-miR-23b-3p     | 2.87x10 <sup>-1</sup> | 3.43x10 <sup>-1</sup>    | 0.092                                    |
| hsa-miR-338-5p     | 6.81x10 <sup>-1</sup> | 7.21x10 <sup>-1</sup>    | 0.070                                    |
| hsa-miR-32-5p      | 6.11x10 <sup>-1</sup> | 6.56x10 <sup>-1</sup>    | 0.056                                    |
| hsa-miR-135a-5p    | 6.93x10 <sup>-1</sup> | 7.21x10 <sup>-1</sup>    | 0.055                                    |
| hsa-miR-1280 (v18) | 6.89x10 <sup>-1</sup> | 7.21x10 <sup>-1</sup>    | 0.047                                    |
| hsa-miR-92b-3p     | 6.85x10 <sup>-1</sup> | 7.21x10 <sup>-1</sup>    | 0.042                                    |
| hsa-miR-130b-3p    | 6.84x10 <sup>-1</sup> | 7.21x10 <sup>-1</sup>    | 0.034                                    |
| hsa-miR-126-5p     | 7.12x10 <sup>-1</sup> | 7.39x10 <sup>-1</sup>    | 0.032                                    |
| hsa-miR-17-5p      | 6.92x10 <sup>-1</sup> | 7.21x10 <sup>-1</sup>    | 0.031                                    |
| hsa-miR-598-3p     | 7.58x10 <sup>-1</sup> | 7.79x10 <sup>-1</sup>    | 0.030                                    |
| hsa-miR-196b-5p    | 9.22x10 <sup>-1</sup> | 9.32x10 <sup>-1</sup>    | 0.009                                    |
| hsa-miR-302f       | 8.67x10 <sup>-1</sup> | 8.83x10 <sup>-1</sup>    | 0.007                                    |
| hsa-miR-15b-5p     | 9.65x10 <sup>-1</sup> | 9.72x10 <sup>-1</sup>    | 0.003                                    |
| hsa-miR-93-3p      | 9.98x10 <sup>-1</sup> | 9.98x10 <sup>-1</sup>    | 0.000                                    |
| hsa-miR-21-3p      | 9.73x10 <sup>-1</sup> | 9.77x10 <sup>-1</sup>    | -0.004                                   |
| hsa-miR-18b-5p     | 8.05x10 <sup>-1</sup> | 8.22x10 <sup>-1</sup>    | -0.023                                   |
| hsa-miR-452-5p     | 8.92x10 <sup>-1</sup> | 9.05x10 <sup>-1</sup>    | -0.026                                   |
| hsa-miR-335-5p     | 7.59x10 <sup>-1</sup> | 7.79x10 <sup>-1</sup>    | -0.031                                   |
| hsa-miR-421        | 5.27x10 <sup>-1</sup> | 5.69x10 <sup>-1</sup>    | -0.038                                   |

Table SII. Continued.

| miRNA           | P-value               | FDR corrected<br>P-value | Fold-change<br>in log <sub>2</sub> scale |
|-----------------|-----------------------|--------------------------|------------------------------------------|
| hsa-miR-222-3p  | 7.48x10 <sup>-1</sup> | 7.73x10 <sup>-1</sup>    | -0.046                                   |
| hsa-let-7d-3p   | 5.63x10 <sup>-1</sup> | 6.06x10 <sup>-1</sup>    | -0.054                                   |
| hsa-miR-425-5p  | 3.58x10 <sup>-1</sup> | 4.15x10 <sup>-1</sup>    | -0.059                                   |
| hsa-miR-361-5p  | 4.60x10 <sup>-1</sup> | 5.11x10 <sup>-1</sup>    | -0.063                                   |
| hsa-miR-424-5p  | 6.60x10 <sup>-1</sup> | 7.05x10 <sup>-1</sup>    | -0.064                                   |
| hsa-miR-128-3p  | 2.54x10 <sup>-1</sup> | 3.06x10 <sup>-1</sup>    | -0.066                                   |
| hsa-miR-106a-5p | 1.63x10 <sup>-1</sup> | 2.08x10 <sup>-1</sup>    | -0.083                                   |
| hsa-miR-148b-3p | 2.32x10 <sup>-1</sup> | 2.81x10 <sup>-1</sup>    | -0.087                                   |
| hsa-miR-136-3p  | 6.66x10 <sup>-1</sup> | 7.09x10 <sup>-1</sup>    | -0.095                                   |
| hsa-miR-197-3p  | 2.24x10 <sup>-1</sup> | 2.74x10 <sup>-1</sup>    | -0.105                                   |
| hsa-miR-130a-3p | 3.42x10 <sup>-1</sup> | 4.04x10 <sup>-1</sup>    | -0.110                                   |
| hsa-miR-340-5p  | 2.94x10 <sup>-1</sup> | 3.50x10 <sup>-1</sup>    | -0.113                                   |
| hsa-miR-143-3p  | 3.94x10 <sup>-1</sup> | 4.47x10 <sup>-1</sup>    | -0.118                                   |
| hsa-miR-106b-3p | 3.18x10 <sup>-2</sup> | 5.10x10 <sup>-2</sup>    | -0.140                                   |
| hsa-let-7e-3p   | 3.70x10 <sup>-1</sup> | 4.28x10 <sup>-1</sup>    | -0.146                                   |
| hsa-miR-219a-5p | 1.01x10 <sup>-1</sup> | 1.38x10 <sup>-1</sup>    | -0.148                                   |
| hsa-let-7i-5p   | 2.60x10 <sup>-4</sup> | 9.21x10 <sup>-4</sup>    | -0.151                                   |
| hsa-miR-223-5p  | 1.17x10 <sup>-1</sup> | 1.57x10 <sup>-1</sup>    | -0.171                                   |
| hsa-miR-200c-3p | 3.84x10 <sup>-1</sup> | 4.41x10 <sup>-1</sup>    | -0.183                                   |
| hsa-miR-142-5p  | 7.42x10 <sup>-2</sup> | 1.05x10 <sup>-1</sup>    | -0.186                                   |
| hsa-miR-27b-3p  | 1.26x10 <sup>-1</sup> | 1.68x10 <sup>-1</sup>    | -0.187                                   |
| hsa-miR-23a-5p  | 1.57x10 <sup>-1</sup> | 2.03x10 <sup>-1</sup>    | -0.196                                   |
| hsa-miR-493-3p  | 3.57x10 <sup>-1</sup> | 4.15x10 <sup>-1</sup>    | -0.199                                   |
| hsa-miR-221-3p  | 5.81x10 <sup>-2</sup> | 8.50x10 <sup>-2</sup>    | -0.204                                   |
| hsa-miR-299-3p  | 3.82x10 <sup>-1</sup> | 4.40x10 <sup>-1</sup>    | -0.213                                   |
| hsa-miR-24-3p   | 3.32x10 <sup>-2</sup> | 5.24x10 <sup>-2</sup>    | -0.216                                   |
| hsa-miR-338-3p  | 6.65x10 <sup>-2</sup> | 9.54x10 <sup>-2</sup>    | -0.224                                   |
| hsa-miR-125a-3p | 1.16x10 <sup>-1</sup> | 1.56x10 <sup>-1</sup>    | -0.224                                   |
| hsa-miR-369-3p  | 3.93x10 <sup>-1</sup> | 4.47x10 <sup>-1</sup>    | -0.228                                   |
| hsa-miR-18a-5p  | 3.11x10 <sup>-2</sup> | 5.04x10 <sup>-2</sup>    | -0.249                                   |
| hsa-miR-152-3p  | 8.80x10 <sup>-3</sup> | 1.68x10 <sup>-2</sup>    | -0.261                                   |
| hsa-miR-377-3p  | 2.18x10 <sup>-1</sup> | 2.69x10 <sup>-1</sup>    | -0.274                                   |
| hsa-miR-145-5p  | 2.54x10 <sup>-2</sup> | 4.19x10 <sup>-2</sup>    | -0.324                                   |
| hsa-miR-126-3p  | 1.50x10 <sup>-4</sup> | 6.24x10 <sup>-4</sup>    | -0.331                                   |
| hsa-miR-362-5p  | 1.73x10 <sup>-2</sup> | 2.98x10 <sup>-2</sup>    | -0.351                                   |
| hsa-miR-374a-3p | 5.23x10 <sup>-2</sup> | 7.74x10 <sup>-2</sup>    | -0.365                                   |
| hsa-miR-30c-5p  | 8.26x10 <sup>-3</sup> | 1.59x10 <sup>-2</sup>    | -0.367                                   |
| hsa-miR-23a-3p  | 2.08x10 <sup>-3</sup> | 5.32x10 <sup>-3</sup>    | -0.369                                   |
| hsa-miR-103a-3p | 2.38x10 <sup>-6</sup> | 2.79x10 <sup>-5</sup>    | -0.372                                   |
| hsa-miR-493-5p  | 1.60x10 <sup>-1</sup> | 2.05x10 <sup>-1</sup>    | -0.373                                   |
| hsa-miR-381-3p  | 6.74x10 <sup>-2</sup> | 9.61x10 <sup>-2</sup>    | -0.392                                   |
| hsa-miR-337-5p  | 9.23x10 <sup>-2</sup> | 1.28x10 <sup>-1</sup>    | -0.394                                   |
| hsa-miR-27a-3p  | 1.06x10 <sup>-3</sup> | 2.91x10 <sup>-3</sup>    | -0.405                                   |
| hsa-miR-18a-3p  | 2.62x10 <sup>-5</sup> | 1.64x10 <sup>-4</sup>    | -0.405                                   |
| hsa-miR-1-3p    | 6.10x10 <sup>-2</sup> | 8.85x10 <sup>-2</sup>    | -0.407                                   |
| hsa-miR-151a-3p | 1.61x10 <sup>-4</sup> | 6.29x10 <sup>-4</sup>    | -0.411                                   |
| hsa-miR-146a-5p | 4.16x10 <sup>-3</sup> | 9.13x10 <sup>-3</sup>    | -0.414                                   |
| hsa-miR-335-3p  | 1.75x10 <sup>-2</sup> | 2.99x10 <sup>-2</sup>    | -0.416                                   |
| hsa-miR-425-3p  | 9.55x10 <sup>-4</sup> | 2.66x10 <sup>-3</sup>    | -0.433                                   |
| hsa-miR-146b-5p | 3.29x10 <sup>-3</sup> | 7.70x10 <sup>-3</sup>    | -0.439                                   |
| hsa-miR-130b-5p | 1.44x10 <sup>-3</sup> | 3.88x10 <sup>-3</sup>    | -0.444                                   |
| hsa-miR-328-3p  | 1.31x10 <sup>-2</sup> | 2.34x10 <sup>-2</sup>    | -0.453                                   |
| hsa-miR-597-5p  | 4.06x10 <sup>-2</sup> | 6.27x10 <sup>-2</sup>    | -0.454                                   |
| hsa-miR-337-3p  | 4.52x10 <sup>-2</sup> | 6.90x10 <sup>-2</sup>    | -0.460                                   |
| hsa-miR-374b-5p | 1.54x10 <sup>-3</sup> | 4.04x10 <sup>-3</sup>    | -0.460                                   |

Table SII. Continued.

| miRNA           | P-value               | FDR corrected<br>P-value | Fold-change<br>in log <sub>2</sub> scale |
|-----------------|-----------------------|--------------------------|------------------------------------------|
| hsa-miR-769-5p  | 1.89x10 <sup>-4</sup> | 7.29x10 <sup>-4</sup>    | -0.461                                   |
| hsa-miR-154-5p  | 4.03x10 <sup>-2</sup> | 6.25x10 <sup>-2</sup>    | -0.467                                   |
| hsa-miR-223-3p  | 2.28x10 <sup>-4</sup> | 8.33x10 <sup>-4</sup>    | -0.469                                   |
| hsa-miR-369-5p  | 5.44x10 <sup>-2</sup> | 8.00x10 <sup>-2</sup>    | -0.476                                   |
| hsa-miR-199b-3p | 2.16x10 <sup>-3</sup> | 5.46x10 <sup>-3</sup>    | -0.483                                   |
| hsa-miR-139-5p  | 3.14x10 <sup>-4</sup> | 1.03x10 <sup>-3</sup>    | -0.485                                   |
| hsa-miR-2355-5p | 1.17x10 <sup>-2</sup> | 2.15x10 <sup>-2</sup>    | -0.497                                   |
| hsa-miR-99b-3p  | 7.91x10 <sup>-4</sup> | 2.32x10 <sup>-3</sup>    | -0.513                                   |
| hsa-miR-30e-3p  | 6.85x10 <sup>-6</sup> | 5.66x10 <sup>-5</sup>    | -0.547                                   |
| hsa-miR-30b-5p  | 2.22x10 <sup>-5</sup> | 1.42x10 <sup>-4</sup>    | -0.555                                   |
| hsa-miR-221-5p  | 8.51x10 <sup>-6</sup> | 6.64x10 <sup>-5</sup>    | -0.565                                   |
| hsa-let-7g-5p   | 1.45x10 <sup>-6</sup> | 1.95x10 <sup>-5</sup>    | -0.566                                   |
| hsa-miR-654-3p  | 4.66x10 <sup>-2</sup> | 7.03x10 <sup>-2</sup>    | -0.567                                   |
| hsa-miR-301a-3p | 4.02x10 <sup>-6</sup> | 4.04x10 <sup>-5</sup>    | -0.572                                   |
| hsa-miR-134-5p  | 8.14x10 <sup>-3</sup> | 1.59x10 <sup>-2</sup>    | -0.577                                   |
| hsa-miR-625-5p  | 7.03x10 <sup>-3</sup> | 1.40x10 <sup>-2</sup>    | -0.586                                   |
| hsa-miR-652-3p  | 9.81x10 <sup>-7</sup> | 1.41x10 <sup>-5</sup>    | -0.589                                   |
| hsa-miR-339-3p  | 7.93x10 <sup>-4</sup> | 2.32x10 <sup>-3</sup>    | -0.601                                   |
| hsa-miR-28-3p   | 1.22x10 <sup>-7</sup> | 2.86x10 <sup>-6</sup>    | -0.606                                   |
| hsa-miR-376b-3p | 1.48x10 <sup>-2</sup> | 2.60x10 <sup>-2</sup>    | -0.614                                   |
| hsa-miR-374a-5p | 8.96x10 <sup>-4</sup> | 2.54x10 <sup>-3</sup>    | -0.616                                   |
| hsa-miR-133a-3p | 5.79x10 <sup>-3</sup> | 1.22x10 <sup>-2</sup>    | -0.616                                   |
| hsa-miR-495-3p  | 6.40x10 <sup>-3</sup> | 1.32x10 <sup>-2</sup>    | -0.619                                   |
| hsa-miR-485-5p  | 1.82x10 <sup>-2</sup> | 3.09x10 <sup>-2</sup>    | -0.622                                   |
| hsa-miR-151a-5p | 7.96x10 <sup>-8</sup> | 2.48x10 <sup>-6</sup>    | -0.623                                   |
| hsa-miR-133b    | 3.90x10 <sup>-3</sup> | 8.63x10 <sup>-3</sup>    | -0.643                                   |
| hsa-miR-382-5p  | 8.25x10 <sup>-3</sup> | 1.59x10 <sup>-2</sup>    | -0.646                                   |
| hsa-miR-671-3p  | 6.23x10 <sup>-4</sup> | 1.90x10 <sup>-3</sup>    | -0.646                                   |
| hsa-miR-324-5p  | 7.24x10 <sup>-7</sup> | 1.13x10 <sup>-5</sup>    | -0.648                                   |
| hsa-miR-224-5p  | 2.30x10 <sup>-3</sup> | 5.77x10 <sup>-3</sup>    | -0.705                                   |
| hsa-miR-628-5p  | 1.05x10 <sup>-5</sup> | 7.77x10 <sup>-5</sup>    | -0.711                                   |
| hsa-miR-127-3p  | 3.61x10 <sup>-3</sup> | 8.12x10 <sup>-3</sup>    | -0.727                                   |
| hsa-miR-99b-5p  | 3.18x10 <sup>-7</sup> | 5.95x10 <sup>-6</sup>    | -0.730                                   |
| hsa-miR-584-5p  | 1.79x10 <sup>-6</sup> | 2.19x10 <sup>-5</sup>    | -0.760                                   |
| hsa-miR-136-5p  | 7.30x10 <sup>-4</sup> | 2.21x10 <sup>-3</sup>    | -0.773                                   |
| hsa-miR-551b-3p | 4.96x10 <sup>-6</sup> | 4.81x10 <sup>-5</sup>    | -0.778                                   |
| hsa-miR-125a-5p | 1.39x10 <sup>-7</sup> | 3.01x10 <sup>-6</sup>    | -0.801                                   |
| hsa-miR-301b-3p | 1.15x10 <sup>-4</sup> | 5.31x10 <sup>-4</sup>    | -0.802                                   |
| hsa-miR-539-5p  | 1.27x10 <sup>-4</sup> | 5.60x10 <sup>-4</sup>    | -0.813                                   |
| hsa-miR-33a-5p  | 2.70x10 <sup>-4</sup> | 9.25x10 <sup>-4</sup>    | -0.814                                   |
| hsa-miR-374c-5p | 7.87x10 <sup>-6</sup> | 6.32x10 <sup>-5</sup>    | -0.816                                   |
| hsa-miR-199a-5p | 9.27x10 <sup>-5</sup> | 4.57x10 <sup>-4</sup>    | -0.826                                   |
| hsa-miR-487b-3p | 9.46x10 <sup>-4</sup> | 2.66x10 <sup>-3</sup>    | -0.838                                   |
| hsa-miR-491-5p  | 2.78x10 <sup>-7</sup> | 5.57x10 <sup>-6</sup>    | -0.847                                   |
| hsa-miR-485-3p  | 1.51x10 <sup>-3</sup> | 4.00x10 <sup>-3</sup>    | -0.851                                   |
| hsa-miR-411-3p  | 3.03x10 <sup>-3</sup> | 7.29x10 <sup>-3</sup>    | -0.853                                   |
| hsa-miR-454-3p  | 6.07E-10              | 3.41x10 <sup>-8</sup>    | -0.855                                   |
| hsa-miR-431-5p  | 1.65x10 <sup>-3</sup> | 4.30x10 <sup>-3</sup>    | -0.859                                   |
| hsa-miR-28-5p   | 5.85x10 <sup>-8</sup> | 2.06x10 <sup>-6</sup>    | -0.864                                   |
| hsa-miR-23c     | 1.69x10 <sup>-9</sup> | 7.89x10 <sup>-8</sup>    | -0.945                                   |
| hsa-miR-503-5p  | 3.94x10 <sup>-6</sup> | 4.04x10 <sup>-5</sup>    | -0.962                                   |
| hsa-miR-654-5p  | 1.37x10 <sup>-4</sup> | 5.83x10 <sup>-4</sup>    | -0.978                                   |
| hsa-miR-432-5p  | 4.04x10 <sup>-4</sup> | 1.28x10 <sup>-3</sup>    | -0.979                                   |
| hsa-miR-107     | 4.33E-14              | 1.22E-11                 | -0.987                                   |
| hsa-miR-379-5p  | 8.63x10 <sup>-5</sup> | 4.33x10 <sup>-4</sup>    | -1.032                                   |

Table SII. Continued.

| miRNA           | P-value               | FDR corrected<br>P-value | Fold-change<br>in log <sub>2</sub> scale |
|-----------------|-----------------------|--------------------------|------------------------------------------|
| hsa-miR-330-3p  | 4.36x10 <sup>-7</sup> | 7.21x10 <sup>-6</sup>    | -1.033                                   |
| hsa-miR-191-5p  | 4.38E-12              | 6.16E-10                 | -1.061                                   |
| hsa-miR-411-5p  | 1.22x10 <sup>-5</sup> | 8.36x10 <sup>-5</sup>    | -1.084                                   |
| hsa-let-7a-5p   | 7.53E-12              | 7.05E-10                 | -1.091                                   |
| hsa-let-7f-5p   | 5.40x10 <sup>-9</sup> | 2.17x10 <sup>-7</sup>    | -1.131                                   |
| hsa-miR-181d-5p | 1.21x10 <sup>-7</sup> | 2.86x10 <sup>-6</sup>    | -1.134                                   |
| hsa-miR-1973    | 8.17x10 <sup>-4</sup> | 2.34x10 <sup>-3</sup>    | -1.134                                   |

Table SIII. miRNA expression comparison of pancreatic ductal adenocarcinoma patients (PDAC) vs. chronic pancreatitis patients (CP) and control group (CG).

| miRNA           | P-value               | FDR corrected P-value | Fold-change in log <sub>2</sub> scale |
|-----------------|-----------------------|-----------------------|---------------------------------------|
| hsa-miR-135b-5p | 1.11x10 <sup>-6</sup> | 3.53x10 <sup>-5</sup> | 1.636                                 |
| hsa-miR-573     | 8.71x10 <sup>-4</sup> | 4.32x10 <sup>-3</sup> | 1.294                                 |
| hsa-miR-621     | 4.50x10 <sup>-5</sup> | 5.50x10 <sup>-4</sup> | 1.293                                 |
| hsa-miR-596     | 1.37x10 <sup>-3</sup> | 5.75x10 <sup>-3</sup> | 1.079                                 |
| hsa-miR-1825    | 7.46x10 <sup>-4</sup> | 4.06x10 <sup>-3</sup> | 1.052                                 |
| hsa-miR-34a-3p  | 7.58x10 <sup>-6</sup> | 1.38x10 <sup>-4</sup> | 1.030                                 |
| hsa-miR-4257    | 5.84x10 <sup>-3</sup> | 1.75x10 <sup>-2</sup> | 1.028                                 |
| hsa-miR-34b-3p  | 6.50x10 <sup>-4</sup> | 3.65x10 <sup>-3</sup> | 0.995                                 |
| hsa-miR-365b-5p | 2.41x10 <sup>-3</sup> | 9.27x10 <sup>-3</sup> | 0.944                                 |
| hsa-miR-196a-5p | 2.67x10 <sup>-4</sup> | 1.88x10 <sup>-3</sup> | 0.932                                 |
| hsa-miR-616-3p  | 7.42x10 <sup>-5</sup> | 6.95x10 <sup>-4</sup> | 0.912                                 |
| hsa-miR-518b    | 2.28x10 <sup>-2</sup> | 5.01x10 <sup>-2</sup> | 0.871                                 |
| hsa-miR-1207-5p | 1.09x10 <sup>-2</sup> | 2.77x10 <sup>-2</sup> | 0.814                                 |
| hsa-miR-609     | 1.52x10 <sup>-2</sup> | 3.58x10 <sup>-2</sup> | 0.797                                 |
| hsa-miR-1290    | 2.54x10 <sup>-3</sup> | 9.60x10 <sup>-3</sup> | 0.785                                 |
| hsa-miR-1275    | 1.26x10 <sup>-3</sup> | 5.55x10 <sup>-3</sup> | 0.772                                 |
| hsa-miR-95-3p   | 5.46x10 <sup>-4</sup> | 3.29x10 <sup>-3</sup> | 0.725                                 |
| hsa-miR-650     | 3.08x10 <sup>-2</sup> | 6.23x10 <sup>-2</sup> | 0.724                                 |
| hsa-miR-34a-5p  | 8.41x10 <sup>-4</sup> | 4.29x10 <sup>-3</sup> | 0.694                                 |
| hsa-miR-620     | 1.86x10 <sup>-2</sup> | 4.29x10 <sup>-2</sup> | 0.687                                 |
| hsa-miR-429     | 8.08x10 <sup>-4</sup> | 4.21x10 <sup>-3</sup> | 0.668                                 |
| hsa-miR-1291    | 5.59x10 <sup>-3</sup> | 1.70x10 <sup>-2</sup> | 0.663                                 |
| hsa-miR-365a-3p | 6.36x10 <sup>-3</sup> | 1.86x10 <sup>-2</sup> | 0.656                                 |
| hsa-miR-200b-3p | 2.80x10 <sup>-3</sup> | 1.01x10 <sup>-2</sup> | 0.646                                 |
| hsa-miR-196b-3p | 1.88x10 <sup>-5</sup> | 2.67x10 <sup>-4</sup> | 0.637                                 |
| hsa-miR-483-3p  | 2.86x10 <sup>-2</sup> | 5.91x10 <sup>-2</sup> | 0.604                                 |
| hsa-miR-194-5p  | 7.68x10 <sup>-3</sup> | 2.16x10 <sup>-2</sup> | 0.603                                 |
| hsa-miR-363-3p  | 2.45x10 <sup>-4</sup> | 1.81x10 <sup>-3</sup> | 0.574                                 |
| hsa-miR-144-3p  | 4.29x10 <sup>-2</sup> | 7.83x10 <sup>-2</sup> | 0.560                                 |
| hsa-miR-29c-3p  | 6.09x10 <sup>-8</sup> | 4.28x10 <sup>-6</sup> | 0.559                                 |
| hsa-miR-451a    | 2.11x10 <sup>-2</sup> | 4.71x10 <sup>-2</sup> | 0.559                                 |
| hsa-miR-193b-3p | 4.14x10 <sup>-2</sup> | 7.65x10 <sup>-2</sup> | 0.550                                 |
| hsa-miR-616-5p  | 5.50x10 <sup>-4</sup> | 3.29x10 <sup>-3</sup> | 0.511                                 |
| hsa-miR-660-5p  | 5.66x10 <sup>-4</sup> | 3.31x10 <sup>-3</sup> | 0.509                                 |
| hsa-miR-10a-3p  | 3.71x10 <sup>-3</sup> | 1.27x10 <sup>-2</sup> | 0.505                                 |
| hsa-miR-25-5p   | 3.22x10 <sup>-3</sup> | 1.15x10 <sup>-2</sup> | 0.503                                 |
| hsa-miR-651-5p  | 6.36x10 <sup>-5</sup> | 6.38x10 <sup>-4</sup> | 0.503                                 |
| hsa-miR-770-5p  | 3.40x10 <sup>-2</sup> | 6.58x10 <sup>-2</sup> | 0.498                                 |
| hsa-miR-200c-5p | 1.66x10 <sup>-1</sup> | 2.42x10 <sup>-1</sup> | 0.497                                 |
| hsa-miR-1285-3p | 2.10x10 <sup>-7</sup> | 1.18x10 <sup>-5</sup> | 0.484                                 |
| hsa-miR-483-5p  | 1.07x10 <sup>-1</sup> | 1.72x10 <sup>-1</sup> | 0.482                                 |
| hsa-miR-454-5p  | 1.82x10 <sup>-6</sup> | 4.65x10 <sup>-5</sup> | 0.478                                 |
| hsa-miR-576-5p  | 4.01x10 <sup>-6</sup> | 8.66x10 <sup>-5</sup> | 0.478                                 |
| hsa-miR-101-3p  | 1.04x10 <sup>-3</sup> | 4.86x10 <sup>-3</sup> | 0.467                                 |
| hsa-miR-362-3p  | 2.77x10 <sup>-3</sup> | 1.01x10 <sup>-2</sup> | 0.463                                 |
| hsa-miR-627-5p  | 5.97x10 <sup>-5</sup> | 6.21x10 <sup>-4</sup> | 0.461                                 |
| hsa-miR-378a-3p | 1.35x10 <sup>-3</sup> | 5.73x10 <sup>-3</sup> | 0.458                                 |
| hsa-let-7b-3p   | 3.10x10 <sup>-4</sup> | 2.12x10 <sup>-3</sup> | 0.457                                 |
| hsa-miR-192-5p  | 5.11x10 <sup>-2</sup> | 8.92x10 <sup>-2</sup> | 0.448                                 |
| hsa-miR-455-5p  | 2.13x10 <sup>-1</sup> | 2.89x10 <sup>-1</sup> | 0.443                                 |
| hsa-miR-1299    | 1.29x10 <sup>-1</sup> | 1.97x10 <sup>-1</sup> | 0.437                                 |
| hsa-miR-22-3p   | 1.57x10 <sup>-6</sup> | 4.41x10 <sup>-5</sup> | 0.411                                 |
| hsa-miR-96-5p   | 1.44x10 <sup>-1</sup> | 2.14x10 <sup>-1</sup> | 0.407                                 |

Table SIII. Continued.

| miRNA              | P-value               | FDR corrected P-value | Fold-change in log <sub>2</sub> scale |
|--------------------|-----------------------|-----------------------|---------------------------------------|
| hsa-miR-193a-5p    | 1.23x10 <sup>-1</sup> | 1.89x10 <sup>-1</sup> | 0.405                                 |
| hsa-miR-29a-3p     | 1.00x10 <sup>-3</sup> | 4.76x10 <sup>-3</sup> | 0.401                                 |
| hsa-miR-502-3p     | 3.67x10 <sup>-3</sup> | 1.27x10 <sup>-2</sup> | 0.388                                 |
| hsa-miR-15a-5p     | 1.32x10 <sup>-3</sup> | 5.72x10 <sup>-3</sup> | 0.384                                 |
| hsa-miR-15b-3p     | 2.64x10 <sup>-4</sup> | 1.88x10 <sup>-3</sup> | 0.377                                 |
| hsa-miR-20b-5p     | 2.38x10 <sup>-2</sup> | 5.10x10 <sup>-2</sup> | 0.374                                 |
| hsa-miR-4306       | 2.28x10 <sup>-4</sup> | 1.78x10 <sup>-3</sup> | 0.373                                 |
| hsa-let-7f-2-3p    | 8.43x10 <sup>-3</sup> | 2.30x10 <sup>-2</sup> | 0.373                                 |
| hsa-miR-19b-3p     | 6.96x10 <sup>-5</sup> | 6.75x10 <sup>-4</sup> | 0.342                                 |
| hsa-miR-16-5p      | 2.51x10 <sup>-2</sup> | 5.30x10 <sup>-2</sup> | 0.342                                 |
| hsa-let-7g-3p      | 3.84x10 <sup>-3</sup> | 1.28x10 <sup>-2</sup> | 0.338                                 |
| hsa-miR-183-5p     | 2.01x10 <sup>-1</sup> | 2.78x10 <sup>-1</sup> | 0.338                                 |
| hsa-let-7a-3p      | 2.57x10 <sup>-3</sup> | 9.60x10 <sup>-3</sup> | 0.336                                 |
| hsa-miR-25-3p      | 2.40x10 <sup>-2</sup> | 5.10x10 <sup>-2</sup> | 0.335                                 |
| hsa-miR-378a-5p    | 5.33x10 <sup>-3</sup> | 1.65x10 <sup>-2</sup> | 0.332                                 |
| hsa-miR-21-5p      | 9.43x10 <sup>-4</sup> | 4.57x10 <sup>-3</sup> | 0.319                                 |
| hsa-miR-30d-3p     | 9.66x10 <sup>-3</sup> | 2.56x10 <sup>-2</sup> | 0.318                                 |
| hsa-miR-30d-3p     | 9.66x10 <sup>-3</sup> | 2.56x10 <sup>-2</sup> | 0.318                                 |
| hsa-miR-1271-5p    | 2.28x10 <sup>-3</sup> | 8.90x10 <sup>-3</sup> | 0.316                                 |
| hsa-miR-101-5p     | 1.33x10 <sup>-2</sup> | 3.24x10 <sup>-2</sup> | 0.314                                 |
| hsa-miR-141-3p     | 9.04x10 <sup>-2</sup> | 1.49x10 <sup>-1</sup> | 0.314                                 |
| hsa-miR-148a-3p    | 3.87x10 <sup>-3</sup> | 1.28x10 <sup>-2</sup> | 0.313                                 |
| hsa-miR-19a-3p     | 4.57x10 <sup>-4</sup> | 2.90x10 <sup>-3</sup> | 0.312                                 |
| hsa-miR-206        | 3.95x10 <sup>-1</sup> | 4.62x10 <sup>-1</sup> | 0.308                                 |
| hsa-miR-9-3p       | 2.33x10 <sup>-2</sup> | 5.08x10 <sup>-2</sup> | 0.304                                 |
| hsa-miR-92a-3p     | 1.48x10 <sup>-2</sup> | 3.54x10 <sup>-2</sup> | 0.295                                 |
| hsa-miR-579-3p     | 1.64x10 <sup>-2</sup> | 3.82x10 <sup>-2</sup> | 0.284                                 |
| hsa-miR-629-5p     | 2.36x10 <sup>-2</sup> | 5.10x10 <sup>-2</sup> | 0.273                                 |
| hsa-miR-99a-5p     | 1.98x10 <sup>-1</sup> | 2.76x10 <sup>-1</sup> | 0.273                                 |
| hsa-miR-720 (v18)  | 2.32x10 <sup>-1</sup> | 3.09x10 <sup>-1</sup> | 0.264                                 |
| hsa-miR-10a-5p     | 3.01x10 <sup>-2</sup> | 6.17x10 <sup>-2</sup> | 0.263                                 |
| hsa-let-7f-1-3p    | 5.63x10 <sup>-3</sup> | 1.70x10 <sup>-2</sup> | 0.258                                 |
| hsa-miR-486-5p     | 1.95x10 <sup>-1</sup> | 2.74x10 <sup>-1</sup> | 0.256                                 |
| hsa-miR-497-5p     | 4.00x10 <sup>-2</sup> | 7.44x10 <sup>-2</sup> | 0.255                                 |
| hsa-miR-29c-5p     | 5.52x10 <sup>-6</sup> | 1.11x10 <sup>-4</sup> | 0.255                                 |
| hsa-miR-4732-3p    | 3.05x10 <sup>-1</sup> | 3.79x10 <sup>-1</sup> | 0.253                                 |
| hsa-miR-532-5p     | 3.11x10 <sup>-2</sup> | 6.25x10 <sup>-2</sup> | 0.246                                 |
| hsa-miR-216a-5p    | 4.60x10 <sup>-1</sup> | 5.22x10 <sup>-1</sup> | 0.236                                 |
| hsa-miR-320a       | 1.54x10 <sup>-2</sup> | 3.61x10 <sup>-2</sup> | 0.221                                 |
| hsa-miR-20a-5p     | 6.90x10 <sup>-3</sup> | 1.96x10 <sup>-2</sup> | 0.220                                 |
| hsa-miR-181a-5p    | 4.96x10 <sup>-3</sup> | 1.55x10 <sup>-2</sup> | 0.217                                 |
| hsa-miR-23b-3p     | 4.94x10 <sup>-3</sup> | 1.55x10 <sup>-2</sup> | 0.209                                 |
| hsa-miR-550a-5p    | 1.00x10 <sup>-1</sup> | 1.63x10 <sup>-1</sup> | 0.207                                 |
| hsa-miR-204-5p     | 1.84x10 <sup>-1</sup> | 2.63x10 <sup>-1</sup> | 0.206                                 |
| hsa-miR-215-5p     | 4.11x10 <sup>-1</sup> | 4.77x10 <sup>-1</sup> | 0.204                                 |
| hsa-miR-589-5p     | 1.37x10 <sup>-2</sup> | 3.32x10 <sup>-2</sup> | 0.200                                 |
| hsa-miR-34b-5p     | 4.23x10 <sup>-1</sup> | 4.89x10 <sup>-1</sup> | 0.199                                 |
| hsa-miR-30a-5p     | 1.89x10 <sup>-1</sup> | 2.67x10 <sup>-1</sup> | 0.198                                 |
| hsa-miR-874-3p     | 2.48x10 <sup>-1</sup> | 3.25x10 <sup>-1</sup> | 0.198                                 |
| hsa-miR-185-5p     | 9.46x10 <sup>-3</sup> | 2.55x10 <sup>-2</sup> | 0.193                                 |
| hsa-miR-331-5p     | 6.60x10 <sup>-3</sup> | 1.91x10 <sup>-2</sup> | 0.189                                 |
| hsa-miR-132-3p     | 4.97x10 <sup>-2</sup> | 8.82x10 <sup>-2</sup> | 0.188                                 |
| hsa-miR-335-5p     | 3.97x10 <sup>-2</sup> | 7.44x10 <sup>-2</sup> | 0.188                                 |
| hsa-miR-1280 (v18) | 9.20x10 <sup>-2</sup> | 1.50x10 <sup>-1</sup> | 0.185                                 |
| hsa-miR-195-5p     | 4.70x10 <sup>-2</sup> | 8.46x10 <sup>-2</sup> | 0.184                                 |
| hsa-miR-181a-2-3p  | 2.60x10 <sup>-2</sup> | 5.42x10 <sup>-2</sup> | 0.184                                 |



Table SIII. Continued.

| miRNA            | P-value               | FDR corrected<br>P-value | Fold-change<br>in log <sub>2</sub> scale |
|------------------|-----------------------|--------------------------|------------------------------------------|
| hsa-miR-598-3p   | 3.24x10 <sup>-2</sup> | 6.46x10 <sup>-2</sup>    | 0.182                                    |
| hsa-miR-30e-5p   | 2.21x10 <sup>-4</sup> | 1.77x10 <sup>-3</sup>    | 0.177                                    |
| hsa-miR-320e     | 1.43x10 <sup>-1</sup> | 2.14x10 <sup>-1</sup>    | 0.175                                    |
| hsa-miR-125b-5p  | 3.86x10 <sup>-1</sup> | 4.53x10 <sup>-1</sup>    | 0.172                                    |
| hsa-miR-10b-5p   | 4.91x10 <sup>-1</sup> | 5.51x10 <sup>-1</sup>    | 0.170                                    |
| hsa-miR-21-3p    | 7.28x10 <sup>-2</sup> | 1.22x10 <sup>-1</sup>    | 0.167                                    |
| hsa-miR-148a-5p  | 1.49x10 <sup>-1</sup> | 2.20x10 <sup>-1</sup>    | 0.167                                    |
| hsa-miR-500a-3p  | 8.18x10 <sup>-2</sup> | 1.36x10 <sup>-1</sup>    | 0.164                                    |
| hsa-miR-126-5p   | 4.81x10 <sup>-2</sup> | 8.61x10 <sup>-2</sup>    | 0.160                                    |
| hsa-miR-181b-5p  | 1.37x10 <sup>-1</sup> | 2.07x10 <sup>-1</sup>    | 0.159                                    |
| hsa-miR-590-5p   | 2.23x10 <sup>-2</sup> | 4.93x10 <sup>-2</sup>    | 0.158                                    |
| hsa-miR-29b-3p   | 1.16x10 <sup>-1</sup> | 1.83x10 <sup>-1</sup>    | 0.152                                    |
| hsa-miR-130b-3p  | 3.77x10 <sup>-2</sup> | 7.11x10 <sup>-2</sup>    | 0.146                                    |
| hsa-miR-484      | 5.00x10 <sup>-2</sup> | 8.82x10 <sup>-2</sup>    | 0.145                                    |
| hsa-miR-338-5p   | 3.01x10 <sup>-1</sup> | 3.77x10 <sup>-1</sup>    | 0.139                                    |
| hsa-miR-17-3p    | 1.09x10 <sup>-1</sup> | 1.75x10 <sup>-1</sup>    | 0.137                                    |
| hsa-miR-423-5p   | 1.12x10 <sup>-1</sup> | 1.78x10 <sup>-1</sup>    | 0.128                                    |
| hsa-miR-345-5p   | 1.18x10 <sup>-1</sup> | 1.85x10 <sup>-1</sup>    | 0.125                                    |
| hsa-miR-130a-3p  | 2.10x10 <sup>-1</sup> | 2.87x10 <sup>-1</sup>    | 0.119                                    |
| hsa-miR-320d     | 1.87x10 <sup>-1</sup> | 2.66x10 <sup>-1</sup>    | 0.116                                    |
| hsa-miR-186-5p   | 8.77x10 <sup>-4</sup> | 4.32x10 <sup>-3</sup>    | 0.114                                    |
| hsa-miR-29a-5p   | 3.55x10 <sup>-1</sup> | 4.26x10 <sup>-1</sup>    | 0.113                                    |
| hsa-miR-140-3p   | 1.76x10 <sup>-1</sup> | 2.55x10 <sup>-1</sup>    | 0.113                                    |
| hsa-miR-15b-5p   | 6.39x10 <sup>-2</sup> | 1.08x10 <sup>-1</sup>    | 0.110                                    |
| hsa-miR-211-5p   | 5.40x10 <sup>-1</sup> | 5.99x10 <sup>-1</sup>    | 0.107                                    |
| hsa-miR-421      | 4.24x10 <sup>-2</sup> | 7.78x10 <sup>-2</sup>    | 0.103                                    |
| hsa-miR-324-3p   | 1.16x10 <sup>-1</sup> | 1.82x10 <sup>-1</sup>    | 0.102                                    |
| hsa-miR-320c     | 2.80x10 <sup>-1</sup> | 3.56x10 <sup>-1</sup>    | 0.093                                    |
| hsa-miR-32-5p    | 3.29x10 <sup>-1</sup> | 4.03x10 <sup>-1</sup>    | 0.090                                    |
| hsa-miR-148b-3p  | 1.79x10 <sup>-1</sup> | 2.57x10 <sup>-1</sup>    | 0.089                                    |
| hsa-miR-532-3p   | 2.80x10 <sup>-1</sup> | 3.56x10 <sup>-1</sup>    | 0.089                                    |
| hsa-let-7d-3p    | 2.62x10 <sup>-1</sup> | 3.40x10 <sup>-1</sup>    | 0.085                                    |
| hsa-miR-505-3p   | 3.62x10 <sup>-1</sup> | 4.33x10 <sup>-1</sup>    | 0.083                                    |
| hsa-miR-106b-5p  | 3.53x10 <sup>-1</sup> | 4.26x10 <sup>-1</sup>    | 0.080                                    |
| hsa-miR-450a-5p  | 5.42x10 <sup>-1</sup> | 5.99x10 <sup>-1</sup>    | 0.078                                    |
| hsa-miR-196b-5p  | 3.33x10 <sup>-1</sup> | 4.03x10 <sup>-1</sup>    | 0.078                                    |
| hsa-miR-29b-2-5p | 3.30x10 <sup>-1</sup> | 4.03x10 <sup>-1</sup>    | 0.078                                    |
| hsa-miR-629-3p   | 4.64x10 <sup>-1</sup> | 5.23x10 <sup>-1</sup>    | 0.076                                    |
| hsa-miR-424-5p   | 5.74x10 <sup>-1</sup> | 6.30x10 <sup>-1</sup>    | 0.073                                    |
| hsa-miR-138-5p   | 5.85x10 <sup>-1</sup> | 6.39x10 <sup>-1</sup>    | 0.071                                    |
| hsa-miR-361-5p   | 3.29x10 <sup>-1</sup> | 4.03x10 <sup>-1</sup>    | 0.070                                    |
| hsa-miR-452-5p   | 6.64x10 <sup>-1</sup> | 7.12x10 <sup>-1</sup>    | 0.068                                    |
| hsa-miR-15a-3p   | 4.03x10 <sup>-1</sup> | 4.69x10 <sup>-1</sup>    | 0.060                                    |
| hsa-miR-340-5p   | 5.36x10 <sup>-1</sup> | 5.98x10 <sup>-1</sup>    | 0.060                                    |
| hsa-miR-197-3p   | 4.39x10 <sup>-1</sup> | 5.04x10 <sup>-1</sup>    | 0.056                                    |
| hsa-miR-27b-3p   | 6.21x10 <sup>-1</sup> | 6.71x10 <sup>-1</sup>    | 0.054                                    |
| hsa-miR-199b-5p  | 7.91x10 <sup>-1</sup> | 8.29x10 <sup>-1</sup>    | 0.038                                    |
| hsa-miR-128-3p   | 4.56x10 <sup>-1</sup> | 5.19x10 <sup>-1</sup>    | 0.036                                    |
| hsa-miR-320b     | 7.44x10 <sup>-1</sup> | 7.86x10 <sup>-1</sup>    | 0.033                                    |
| hsa-miR-143-3p   | 8.33x10 <sup>-1</sup> | 8.65x10 <sup>-1</sup>    | 0.028                                    |
| hsa-miR-23a-5p   | 8.20x10 <sup>-1</sup> | 8.57x10 <sup>-1</sup>    | 0.027                                    |
| hsa-miR-500a-5p  | 8.65x10 <sup>-1</sup> | 8.87x10 <sup>-1</sup>    | 0.020                                    |
| hsa-miR-92b-3p   | 8.34x10 <sup>-1</sup> | 8.65x10 <sup>-1</sup>    | 0.019                                    |
| hsa-miR-223-5p   | 9.92x10 <sup>-1</sup> | 9.92x10 <sup>-1</sup>    | -0.001                                   |
| hsa-miR-302f     | 9.39x10 <sup>-1</sup> | 9.56x10 <sup>-1</sup>    | -0.003                                   |

Table SIII. Continued.

| miRNA           | P-value               | FDR corrected<br>P-value | Fold-change<br>in log <sub>2</sub> scale |
|-----------------|-----------------------|--------------------------|------------------------------------------|
| hsa-miR-214-3p  | 9.91x10 <sup>-1</sup> | 9.92x10 <sup>-1</sup>    | -0.003                                   |
| hsa-miR-221-3p  | 9.71x10 <sup>-1</sup> | 9.78x10 <sup>-1</sup>    | -0.003                                   |
| hsa-miR-501-5p  | 9.67x10 <sup>-1</sup> | 9.77x10 <sup>-1</sup>    | -0.005                                   |
| hsa-miR-17-5p   | 8.58x10 <sup>-1</sup> | 8.87x10 <sup>-1</sup>    | -0.012                                   |
| hsa-miR-205-5p  | 9.50x10 <sup>-1</sup> | 9.64x10 <sup>-1</sup>    | -0.019                                   |
| hsa-miR-136-3p  | 9.11x10 <sup>-1</sup> | 9.30x10 <sup>-1</sup>    | -0.021                                   |
| hsa-miR-142-5p  | 7.54x10 <sup>-1</sup> | 7.93x10 <sup>-1</sup>    | -0.028                                   |
| hsa-let-7b-5p   | 7.15x10 <sup>-1</sup> | 7.58x10 <sup>-1</sup>    | -0.029                                   |
| hsa-miR-135a-5p | 6.77x10 <sup>-1</sup> | 7.23x10 <sup>-1</sup>    | -0.048                                   |
| hsa-miR-24-3p   | 5.52x10 <sup>-1</sup> | 6.08x10 <sup>-1</sup>    | -0.050                                   |
| hsa-miR-375     | 8.65x10 <sup>-1</sup> | 8.87x10 <sup>-1</sup>    | -0.055                                   |
| hsa-miR-200c-3p | 6.85x10 <sup>-1</sup> | 7.29x10 <sup>-1</sup>    | -0.067                                   |
| hsa-miR-106b-3p | 2.02x10 <sup>-1</sup> | 2.79x10 <sup>-1</sup>    | -0.069                                   |
| hsa-miR-93-3p   | 2.10x10 <sup>-1</sup> | 2.87x10 <sup>-1</sup>    | -0.069                                   |
| hsa-let-7e-3p   | 5.90x10 <sup>-1</sup> | 6.42x10 <sup>-1</sup>    | -0.075                                   |
| hsa-miR-152-3p  | 3.71x10 <sup>-1</sup> | 4.41x10 <sup>-1</sup>    | -0.078                                   |
| hsa-miR-18b-5p  | 3.01x10 <sup>-1</sup> | 3.77x10 <sup>-1</sup>    | -0.081                                   |
| hsa-miR-106a-5p | 7.97x10 <sup>-2</sup> | 1.33x10 <sup>-1</sup>    | -0.088                                   |
| hsa-miR-222-3p  | 4.33x10 <sup>-1</sup> | 4.99x10 <sup>-1</sup>    | -0.089                                   |
| hsa-miR-425-5p  | 6.31x10 <sup>-2</sup> | 1.07x10 <sup>-1</sup>    | -0.101                                   |
| hsa-miR-150-5p  | 6.43x10 <sup>-1</sup> | 6.92x10 <sup>-1</sup>    | -0.110                                   |
| hsa-let-7i-5p   | 1.50x10 <sup>-3</sup> | 6.13x10 <sup>-3</sup>    | -0.111                                   |
| hsa-miR-493-3p  | 5.32x10 <sup>-1</sup> | 5.96x10 <sup>-1</sup>    | -0.113                                   |
| hsa-miR-369-3p  | 6.15x10 <sup>-1</sup> | 6.67x10 <sup>-1</sup>    | -0.117                                   |
| hsa-miR-18a-5p  | 1.85x10 <sup>-1</sup> | 2.65x10 <sup>-1</sup>    | -0.126                                   |
| hsa-miR-335-3p  | 3.85x10 <sup>-1</sup> | 4.53x10 <sup>-1</sup>    | -0.131                                   |
| hsa-miR-338-3p  | 1.98x10 <sup>-1</sup> | 2.76x10 <sup>-1</sup>    | -0.138                                   |
| hsa-miR-125a-3p | 2.33x10 <sup>-1</sup> | 3.09x10 <sup>-1</sup>    | -0.142                                   |
| hsa-miR-130b-5p | 2.66x10 <sup>-1</sup> | 3.43x10 <sup>-1</sup>    | -0.144                                   |
| hsa-miR-23a-3p  | 1.38x10 <sup>-1</sup> | 2.08x10 <sup>-1</sup>    | -0.152                                   |
| hsa-miR-146b-5p | 2.14x10 <sup>-1</sup> | 2.89x10 <sup>-1</sup>    | -0.155                                   |
| hsa-miR-219a-5p | 3.61x10 <sup>-2</sup> | 6.90x10 <sup>-2</sup>    | -0.161                                   |
| hsa-miR-374a-3p | 3.81x10 <sup>-1</sup> | 4.52x10 <sup>-1</sup>    | -0.162                                   |
| hsa-miR-146a-5p | 1.68x10 <sup>-1</sup> | 2.44x10 <sup>-1</sup>    | -0.164                                   |
| hsa-miR-126-3p  | 3.53x10 <sup>-2</sup> | 6.79x10 <sup>-2</sup>    | -0.164                                   |
| hsa-miR-2355-5p | 3.18x10 <sup>-1</sup> | 3.94x10 <sup>-1</sup>    | -0.165                                   |
| hsa-miR-150-3p  | 4.48x10 <sup>-1</sup> | 5.12x10 <sup>-1</sup>    | -0.169                                   |
| hsa-miR-362-5p  | 1.56x10 <sup>-1</sup> | 2.29x10 <sup>-1</sup>    | -0.171                                   |
| hsa-miR-328-3p  | 2.56x10 <sup>-1</sup> | 3.35x10 <sup>-1</sup>    | -0.172                                   |
| hsa-miR-1-3p    | 3.33x10 <sup>-1</sup> | 4.03x10 <sup>-1</sup>    | -0.183                                   |
| hsa-miR-27a-5p  | 2.20x10 <sup>-1</sup> | 2.94x10 <sup>-1</sup>    | -0.197                                   |
| hsa-miR-377-3p  | 2.96x10 <sup>-1</sup> | 3.75x10 <sup>-1</sup>    | -0.201                                   |
| hsa-miR-299-3p  | 3.04x10 <sup>-1</sup> | 3.79x10 <sup>-1</sup>    | -0.208                                   |
| hsa-miR-151a-3p | 2.07x10 <sup>-2</sup> | 4.66x10 <sup>-2</sup>    | -0.211                                   |
| hsa-miR-342-5p  | 1.22x10 <sup>-1</sup> | 1.88x10 <sup>-1</sup>    | -0.216                                   |
| hsa-miR-199b-3p | 1.04x10 <sup>-1</sup> | 1.67x10 <sup>-1</sup>    | -0.219                                   |
| hsa-miR-625-5p  | 2.15x10 <sup>-1</sup> | 2.89x10 <sup>-1</sup>    | -0.222                                   |
| hsa-miR-27a-3p  | 3.03x10 <sup>-2</sup> | 6.18x10 <sup>-2</sup>    | -0.226                                   |
| hsa-miR-425-3p  | 3.27x10 <sup>-2</sup> | 6.47x10 <sup>-2</sup>    | -0.230                                   |
| hsa-miR-597-5p  | 2.43x10 <sup>-1</sup> | 3.21x10 <sup>-1</sup>    | -0.234                                   |
| hsa-miR-30c-5p  | 3.36x10 <sup>-2</sup> | 6.58x10 <sup>-2</sup>    | -0.240                                   |
| hsa-miR-374b-5p | 5.45x10 <sup>-2</sup> | 9.45x10 <sup>-2</sup>    | -0.244                                   |
| hsa-miR-493-5p  | 2.73x10 <sup>-1</sup> | 3.50x10 <sup>-1</sup>    | -0.246                                   |
| hsa-miR-769-5p  | 1.46x10 <sup>-2</sup> | 3.51x10 <sup>-2</sup>    | -0.249                                   |
| hsa-miR-103a-3p | 1.38x10 <sup>-5</sup> | 2.15x10 <sup>-4</sup>    | -0.272                                   |

Table III. Continued.

| miRNA           | P-value               | FDR corrected<br>P-value | Fold-change<br>in log <sub>2</sub> scale |
|-----------------|-----------------------|--------------------------|------------------------------------------|
| hsa-miR-223-3p  | 1.32x10 <sup>-2</sup> | 3.24x10 <sup>-2</sup>    | -0.278                                   |
| hsa-miR-337-5p  | 1.38x10 <sup>-1</sup> | 2.08x10 <sup>-1</sup>    | -0.287                                   |
| hsa-miR-671-3p  | 6.16x10 <sup>-2</sup> | 1.06x10 <sup>-1</sup>    | -0.296                                   |
| hsa-miR-139-5p  | 9.81x10 <sup>-3</sup> | 2.58x10 <sup>-2</sup>    | -0.302                                   |
| hsa-miR-652-3p  | 2.60x10 <sup>-3</sup> | 9.60x10 <sup>-3</sup>    | -0.303                                   |
| hsa-miR-30b-5p  | 4.69x10 <sup>-3</sup> | 1.50x10 <sup>-2</sup>    | -0.311                                   |
| hsa-miR-381-3p  | 5.89x10 <sup>-2</sup> | 1.02x10 <sup>-1</sup>    | -0.335                                   |
| hsa-miR-28-3p   | 5.86x10 <sup>-4</sup> | 3.36x10 <sup>-3</sup>    | -0.336                                   |
| hsa-miR-337-3p  | 8.97x10 <sup>-2</sup> | 1.48x10 <sup>-1</sup>    | -0.336                                   |
| hsa-miR-1973    | 2.61x10 <sup>-1</sup> | 3.40x10 <sup>-1</sup>    | -0.342                                   |
| hsa-miR-145-5p  | 6.25x10 <sup>-3</sup> | 1.85x10 <sup>-2</sup>    | -0.343                                   |
| hsa-miR-221-5p  | 1.41x10 <sup>-3</sup> | 5.82x10 <sup>-3</sup>    | -0.350                                   |
| hsa-miR-151a-5p | 2.14x10 <sup>-4</sup> | 1.77x10 <sup>-3</sup>    | -0.362                                   |
| hsa-miR-654-3p  | 1.19x10 <sup>-1</sup> | 1.85x10 <sup>-1</sup>    | -0.370                                   |
| hsa-miR-339-3p  | 9.92x10 <sup>-3</sup> | 2.58x10 <sup>-2</sup>    | -0.371                                   |
| hsa-miR-133a-3p | 4.37x10 <sup>-2</sup> | 7.92x10 <sup>-2</sup>    | -0.377                                   |
| hsa-miR-584-5p  | 4.53x10 <sup>-3</sup> | 1.46x10 <sup>-2</sup>    | -0.378                                   |
| hsa-miR-99b-3p  | 3.54x10 <sup>-3</sup> | 1.24x10 <sup>-2</sup>    | -0.379                                   |
| hsa-miR-18a-3p  | 1.13x10 <sup>-6</sup> | 3.53x10 <sup>-5</sup>    | -0.391                                   |
| hsa-miR-154-5p  | 3.72x10 <sup>-2</sup> | 7.06x10 <sup>-2</sup>    | -0.397                                   |
| hsa-miR-374a-5p | 6.68x10 <sup>-3</sup> | 1.92x10 <sup>-2</sup>    | -0.429                                   |
| hsa-miR-133b    | 2.06x10 <sup>-2</sup> | 4.66x10 <sup>-2</sup>    | -0.430                                   |
| hsa-miR-301a-3p | 1.90x10 <sup>-5</sup> | 2.67x10 <sup>-4</sup>    | -0.439                                   |
| hsa-miR-30e-3p  | 7.87x10 <sup>-6</sup> | 1.38x10 <sup>-4</sup>    | -0.444                                   |
| hsa-miR-301b-3p | 1.18x10 <sup>-2</sup> | 2.94x10 <sup>-2</sup>    | -0.447                                   |
| hsa-miR-369-5p  | 3.39x10 <sup>-2</sup> | 6.58x10 <sup>-2</sup>    | -0.449                                   |
| hsa-miR-628-5p  | 7.52x10 <sup>-4</sup> | 4.06x10 <sup>-3</sup>    | -0.458                                   |
| hsa-miR-199a-5p | 1.11x10 <sup>-2</sup> | 2.81x10 <sup>-2</sup>    | -0.460                                   |
| hsa-miR-134-5p  | 8.39x10 <sup>-3</sup> | 2.30x10 <sup>-2</sup>    | -0.475                                   |
| hsa-let-7g-5p   | 9.73x10 <sup>-7</sup> | 3.53x10 <sup>-5</sup>    | -0.487                                   |
| hsa-miR-324-5p  | 3.27x10 <sup>-6</sup> | 7.66x10 <sup>-5</sup>    | -0.487                                   |
| hsa-miR-376b-3p | 2.54x10 <sup>-2</sup> | 5.33x10 <sup>-2</sup>    | -0.496                                   |
| hsa-miR-99b-5p  | 4.74x10 <sup>-5</sup> | 5.55x10 <sup>-4</sup>    | -0.498                                   |
| hsa-miR-495-3p  | 1.13x10 <sup>-2</sup> | 2.83x10 <sup>-2</sup>    | -0.503                                   |
| hsa-miR-224-5p  | 8.25x10 <sup>-3</sup> | 2.30x10 <sup>-2</sup>    | -0.507                                   |
| hsa-miR-485-5p  | 1.88x10 <sup>-2</sup> | 4.31x10 <sup>-2</sup>    | -0.508                                   |
| hsa-miR-28-5p   | 1.61x10 <sup>-4</sup> | 1.41x10 <sup>-3</sup>    | -0.518                                   |
| hsa-miR-33a-5p  | 4.04x10 <sup>-3</sup> | 1.32x10 <sup>-2</sup>    | -0.523                                   |
| hsa-miR-382-5p  | 9.64x10 <sup>-3</sup> | 2.56x10 <sup>-2</sup>    | -0.526                                   |
| hsa-miR-23c     | 1.57x10 <sup>-4</sup> | 1.41x10 <sup>-3</sup>    | -0.527                                   |
| hsa-miR-411-3p  | 5.02x10 <sup>-2</sup> | 8.82x10 <sup>-2</sup>    | -0.540                                   |
| hsa-miR-374c-5p | 4.64x10 <sup>-4</sup> | 2.90x10 <sup>-3</sup>    | -0.548                                   |
| hsa-miR-127-3p  | 1.03x10 <sup>-2</sup> | 2.65x10 <sup>-2</sup>    | -0.560                                   |
| hsa-miR-125a-5p | 1.13x10 <sup>-5</sup> | 1.86x10 <sup>-4</sup>    | -0.568                                   |
| hsa-miR-539-5p  | 2.07x10 <sup>-3</sup> | 8.19x10 <sup>-3</sup>    | -0.569                                   |
| hsa-miR-491-5p  | 3.19x10 <sup>-5</sup> | 4.07x10 <sup>-4</sup>    | -0.571                                   |
| hsa-miR-551b-3p | 2.81x10 <sup>-5</sup> | 3.76x10 <sup>-4</sup>    | -0.590                                   |
| hsa-miR-503-5p  | 4.64x10 <sup>-4</sup> | 2.90x10 <sup>-3</sup>    | -0.615                                   |
| hsa-miR-136-5p  | 1.15x10 <sup>-3</sup> | 5.21x10 <sup>-3</sup>    | -0.649                                   |
| hsa-miR-330-3p  | 1.81x10 <sup>-4</sup> | 1.54x10 <sup>-3</sup>    | -0.650                                   |
| hsa-miR-454-3p  | 5.69x10 <sup>-9</sup> | 8.00x10 <sup>-7</sup>    | -0.667                                   |
| hsa-miR-431-5p  | 3.87x10 <sup>-3</sup> | 1.28x10 <sup>-2</sup>    | -0.678                                   |
| hsa-let-7f-5p   | 5.80x10 <sup>-5</sup> | 6.21x10 <sup>-4</sup>    | -0.679                                   |
| hsa-miR-107     | 1.04x10 <sup>-9</sup> | 2.92x10 <sup>-7</sup>    | -0.684                                   |
| hsa-let-7a-5p   | 6.64x10 <sup>-7</sup> | 3.11x10 <sup>-5</sup>    | -0.689                                   |

Table III. Continued.

| miRNA           | P-value               | FDR corrected<br>P-value | Fold-change<br>in log <sub>2</sub> scale |
|-----------------|-----------------------|--------------------------|------------------------------------------|
| hsa-miR-487b-3p | 1.08x10 <sup>-3</sup> | 4.98x10 <sup>-3</sup>    | -0.709                                   |
| hsa-miR-485-3p  | 1.67x10 <sup>-3</sup> | 6.69x10 <sup>-3</sup>    | -0.716                                   |
| hsa-miR-654-5p  | 1.21x10 <sup>-3</sup> | 5.41x10 <sup>-3</sup>    | -0.722                                   |
| hsa-miR-191-5p  | 1.82x10 <sup>-8</sup> | 1.70x10 <sup>-6</sup>    | -0.724                                   |
| hsa-miR-181d-5p | 5.56x10 <sup>-5</sup> | 6.21x10 <sup>-4</sup>    | -0.728                                   |
| hsa-miR-432-5p  | 7.66x10 <sup>-4</sup> | 4.06x10 <sup>-3</sup>    | -0.780                                   |
| hsa-miR-379-5p  | 3.80x10 <sup>-4</sup> | 2.54x10 <sup>-3</sup>    | -0.805                                   |
| hsa-miR-411-5p  | 2.39x10 <sup>-4</sup> | 1.81x10 <sup>-3</sup>    | -0.814                                   |

FDR, false discovery rate.

Table SIV. miRNA expression comparison of pancreatic ductal adenocarcinoma patients (PDAC) vs. chronic pancreatitis patients (CP).

| miRNA              | FDR corrected         |                       | Fold-change in log <sub>2</sub> scale |
|--------------------|-----------------------|-----------------------|---------------------------------------|
|                    | P-value               | P-value               |                                       |
| hsa-miR-573        | 1.07x10 <sup>-2</sup> | 8.36x10 <sup>-2</sup> | 1.361                                 |
| hsa-miR-135b-5p    | 8.04x10 <sup>-3</sup> | 7.54x10 <sup>-2</sup> | 1.201                                 |
| hsa-miR-621        | 9.39x10 <sup>-3</sup> | 8.17x10 <sup>-2</sup> | 1.117                                 |
| hsa-miR-596        | 1.84x10 <sup>-2</sup> | 1.15x10 <sup>-1</sup> | 1.106                                 |
| hsa-miR-1825       | 1.21x10 <sup>-2</sup> | 8.74x10 <sup>-2</sup> | 1.087                                 |
| hsa-miR-365b-5p    | 2.25x10 <sup>-2</sup> | 1.31x10 <sup>-1</sup> | 0.981                                 |
| hsa-miR-616-3p     | 3.23x10 <sup>-3</sup> | 3.94x10 <sup>-2</sup> | 0.937                                 |
| hsa-miR-34b-3p     | 2.91x10 <sup>-2</sup> | 1.60x10 <sup>-1</sup> | 0.880                                 |
| hsa-miR-1973       | 6.04x10 <sup>-2</sup> | 2.53x10 <sup>-1</sup> | 0.807                                 |
| hsa-miR-4257       | 1.41x10 <sup>-1</sup> | 3.83x10 <sup>-1</sup> | 0.746                                 |
| hsa-miR-1275       | 3.39x10 <sup>-2</sup> | 1.70x10 <sup>-1</sup> | 0.709                                 |
| hsa-miR-34a-3p     | 2.77x10 <sup>-2</sup> | 1.56x10 <sup>-1</sup> | 0.703                                 |
| hsa-miR-609        | 1.29x10 <sup>-1</sup> | 3.66x10 <sup>-1</sup> | 0.692                                 |
| hsa-let-7f-2-3p    | 5.16x10 <sup>-4</sup> | 1.61x10 <sup>-2</sup> | 0.687                                 |
| hsa-miR-1207-5p    | 1.20x10 <sup>-1</sup> | 3.59x10 <sup>-1</sup> | 0.669                                 |
| hsa-miR-770-5p     | 5.07x10 <sup>-2</sup> | 2.16x10 <sup>-1</sup> | 0.668                                 |
| hsa-miR-30d-3p     | 5.99x10 <sup>-4</sup> | 1.65x10 <sup>-2</sup> | 0.616                                 |
| hsa-miR-9-3p       | 1.77x10 <sup>-3</sup> | 2.62x10 <sup>-2</sup> | 0.580                                 |
| hsa-miR-620        | 1.66x10 <sup>-1</sup> | 4.12x10 <sup>-1</sup> | 0.565                                 |
| hsa-miR-196a-5p    | 1.08x10 <sup>-1</sup> | 3.41x10 <sup>-1</sup> | 0.559                                 |
| hsa-miR-650        | 2.20x10 <sup>-1</sup> | 4.67x10 <sup>-1</sup> | 0.552                                 |
| hsa-miR-335-5p     | 7.36x10 <sup>-5</sup> | 8.78x10 <sup>-3</sup> | 0.505                                 |
| hsa-miR-21-5p      | 2.36x10 <sup>-4</sup> | 1.46x10 <sup>-2</sup> | 0.499                                 |
| hsa-miR-196b-3p    | 1.65x10 <sup>-2</sup> | 1.13x10 <sup>-1</sup> | 0.491                                 |
| hsa-miR-616-5p     | 1.87x10 <sup>-2</sup> | 1.15x10 <sup>-1</sup> | 0.486                                 |
| hsa-miR-651-5p     | 5.57x10 <sup>-3</sup> | 6.02x10 <sup>-2</sup> | 0.476                                 |
| hsa-miR-1271-5p    | 1.29x10 <sup>-3</sup> | 2.13x10 <sup>-2</sup> | 0.472                                 |
| hsa-miR-454-5p     | 4.16x10 <sup>-4</sup> | 1.46x10 <sup>-2</sup> | 0.469                                 |
| hsa-miR-130a-3p    | 7.48x10 <sup>-4</sup> | 1.65x10 <sup>-2</sup> | 0.452                                 |
| hsa-miR-22-3p      | 2.68x10 <sup>-4</sup> | 1.46x10 <sup>-2</sup> | 0.451                                 |
| hsa-miR-200b-3p    | 1.66x10 <sup>-1</sup> | 4.12x10 <sup>-1</sup> | 0.437                                 |
| hsa-miR-21-3p      | 1.11x10 <sup>-3</sup> | 2.07x10 <sup>-2</sup> | 0.416                                 |
| hsa-miR-598-3p     | 6.68x10 <sup>-4</sup> | 1.65x10 <sup>-2</sup> | 0.404                                 |
| hsa-miR-27b-3p     | 9.88x10 <sup>-3</sup> | 8.17x10 <sup>-2</sup> | 0.403                                 |
| hsa-miR-518b       | 4.22x10 <sup>-1</sup> | 6.81x10 <sup>-1</sup> | 0.400                                 |
| hsa-miR-429        | 1.64x10 <sup>-1</sup> | 4.12x10 <sup>-1</sup> | 0.398                                 |
| hsa-miR-720 (v18)  | 2.17x10 <sup>-1</sup> | 4.65x10 <sup>-1</sup> | 0.384                                 |
| hsa-miR-1280 (v18) | 1.63x10 <sup>-2</sup> | 1.13x10 <sup>-1</sup> | 0.384                                 |
| hsa-miR-1299       | 3.37x10 <sup>-1</sup> | 6.03x10 <sup>-1</sup> | 0.380                                 |
| hsa-miR-23b-3p     | 3.16x10 <sup>-4</sup> | 1.46x10 <sup>-2</sup> | 0.379                                 |
| hsa-miR-627-5p     | 1.79x10 <sup>-2</sup> | 1.15x10 <sup>-1</sup> | 0.364                                 |
| hsa-miR-34a-5p     | 2.10x10 <sup>-1</sup> | 4.57x10 <sup>-1</sup> | 0.362                                 |
| hsa-miR-23a-5p     | 3.84x10 <sup>-2</sup> | 1.83x10 <sup>-1</sup> | 0.349                                 |
| hsa-miR-148b-3p    | 9.38x10 <sup>-5</sup> | 8.78x10 <sup>-3</sup> | 0.345                                 |
| hsa-miR-126-5p     | 2.32x10 <sup>-3</sup> | 3.11x10 <sup>-2</sup> | 0.345                                 |
| hsa-miR-10a-3p     | 1.64x10 <sup>-1</sup> | 4.12x10 <sup>-1</sup> | 0.337                                 |
| hsa-miR-483-3p     | 3.96x10 <sup>-1</sup> | 6.59x10 <sup>-1</sup> | 0.333                                 |
| hsa-let-7f-1-3p    | 3.09x10 <sup>-3</sup> | 3.94x10 <sup>-2</sup> | 0.328                                 |
| hsa-miR-25-5p      | 1.75x10 <sup>-1</sup> | 4.27x10 <sup>-1</sup> | 0.320                                 |
| hsa-miR-2355-5p    | 1.80x10 <sup>-1</sup> | 4.31x10 <sup>-1</sup> | 0.318                                 |
| hsa-miR-200c-5p    | 5.16x10 <sup>-1</sup> | 7.71x10 <sup>-1</sup> | 0.317                                 |
| hsa-miR-340-5p     | 2.29x10 <sup>-2</sup> | 1.31x10 <sup>-1</sup> | 0.312                                 |
| hsa-miR-421        | 2.52x10 <sup>-6</sup> | 7.08x10 <sup>-4</sup> | 0.308                                 |

Table SIV. Continued.

| miRNA           | P-value               | FDR corrected         | Fold-change               |
|-----------------|-----------------------|-----------------------|---------------------------|
|                 |                       | P-value               | in log <sub>2</sub> scale |
| hsa-miR-130b-3p | 1.51x10 <sup>-3</sup> | 2.36x10 <sup>-2</sup> | 0.308                     |
| hsa-miR-1285-3p | 1.80x10 <sup>-2</sup> | 1.15x10 <sup>-1</sup> | 0.307                     |
| hsa-miR-625-5p  | 2.28x10 <sup>-1</sup> | 4.68x10 <sup>-1</sup> | 0.307                     |
| hsa-miR-1290    | 3.88x10 <sup>-1</sup> | 6.59x10 <sup>-1</sup> | 0.303                     |
| hsa-miR-204-5p  | 1.43x10 <sup>-1</sup> | 3.83x10 <sup>-1</sup> | 0.299                     |
| hsa-miR-130b-5p | 1.03x10 <sup>-1</sup> | 3.31x10 <sup>-1</sup> | 0.292                     |
| hsa-miR-197-3p  | 3.53x10 <sup>-3</sup> | 4.14x10 <sup>-2</sup> | 0.291                     |
| hsa-miR-221-3p  | 3.14x10 <sup>-2</sup> | 1.68x10 <sup>-1</sup> | 0.287                     |
| hsa-let-7d-3p   | 8.05x10 <sup>-3</sup> | 7.54x10 <sup>-2</sup> | 0.286                     |
| hsa-miR-335-3p  | 1.98x10 <sup>-1</sup> | 4.45x10 <sup>-1</sup> | 0.282                     |
| hsa-miR-424-5p  | 1.28x10 <sup>-1</sup> | 3.66x10 <sup>-1</sup> | 0.271                     |
| hsa-miR-148a-5p | 8.00x10 <sup>-2</sup> | 3.17x10 <sup>-1</sup> | 0.270                     |
| hsa-miR-15b-5p  | 7.65x10 <sup>-4</sup> | 1.65x10 <sup>-2</sup> | 0.266                     |
| hsa-let-7g-3p   | 8.99x10 <sup>-2</sup> | 3.28x10 <sup>-1</sup> | 0.264                     |
| hsa-miR-148a-3p | 7.59x10 <sup>-2</sup> | 3.09x10 <sup>-1</sup> | 0.263                     |
| hsa-miR-361-5p  | 6.45x10 <sup>-3</sup> | 6.71x10 <sup>-2</sup> | 0.262                     |
| hsa-let-7b-3p   | 1.45x10 <sup>-1</sup> | 3.83x10 <sup>-1</sup> | 0.261                     |
| hsa-miR-576-5p  | 7.70x10 <sup>-2</sup> | 3.09x10 <sup>-1</sup> | 0.256                     |
| hsa-miR-146b-5p | 1.54x10 <sup>-1</sup> | 3.96x10 <sup>-1</sup> | 0.256                     |
| hsa-miR-223-5p  | 4.18x10 <sup>-2</sup> | 1.91x10 <sup>-1</sup> | 0.246                     |
| hsa-miR-590-5p  | 1.17x10 <sup>-2</sup> | 8.74x10 <sup>-2</sup> | 0.245                     |
| hsa-miR-338-5p  | 8.32x10 <sup>-2</sup> | 3.20x10 <sup>-1</sup> | 0.240                     |
| hsa-miR-143-3p  | 2.10x10 <sup>-1</sup> | 4.57x10 <sup>-1</sup> | 0.238                     |
| hsa-miR-328-3p  | 2.96x10 <sup>-1</sup> | 5.55x10 <sup>-1</sup> | 0.234                     |
| hsa-miR-331-5p  | 2.02x10 <sup>-2</sup> | 1.21x10 <sup>-1</sup> | 0.227                     |
| hsa-let-7a-3p   | 1.79x10 <sup>-1</sup> | 4.31x10 <sup>-1</sup> | 0.214                     |
| hsa-miR-671-3p  | 3.60x10 <sup>-1</sup> | 6.32x10 <sup>-1</sup> | 0.212                     |
| hsa-miR-452-5p  | 3.42x10 <sup>-1</sup> | 6.08x10 <sup>-1</sup> | 0.205                     |
| hsa-miR-1291    | 5.19x10 <sup>-1</sup> | 7.72x10 <sup>-1</sup> | 0.204                     |
| hsa-miR-320a    | 9.88x10 <sup>-2</sup> | 3.28x10 <sup>-1</sup> | 0.204                     |
| hsa-miR-142-5p  | 8.29x10 <sup>-2</sup> | 3.20x10 <sup>-1</sup> | 0.201                     |
| hsa-miR-146a-5p | 2.40x10 <sup>-1</sup> | 4.88x10 <sup>-1</sup> | 0.201                     |
| hsa-miR-24-3p   | 9.71x10 <sup>-2</sup> | 3.28x10 <sup>-1</sup> | 0.192                     |
| hsa-miR-29c-5p  | 1.03x10 <sup>-2</sup> | 8.25x10 <sup>-2</sup> | 0.191                     |
| hsa-miR-152-3p  | 1.18x10 <sup>-1</sup> | 3.59x10 <sup>-1</sup> | 0.188                     |
| hsa-miR-29c-3p  | 1.67x10 <sup>-1</sup> | 4.12x10 <sup>-1</sup> | 0.186                     |
| hsa-miR-128-3p  | 7.14x10 <sup>-3</sup> | 7.17x10 <sup>-2</sup> | 0.184                     |
| hsa-miR-196b-5p | 1.23x10 <sup>-1</sup> | 3.59x10 <sup>-1</sup> | 0.179                     |
| hsa-miR-584-5p  | 3.36x10 <sup>-1</sup> | 6.03x10 <sup>-1</sup> | 0.176                     |
| hsa-miR-199b-3p | 4.00x10 <sup>-1</sup> | 6.62x10 <sup>-1</sup> | 0.165                     |
| hsa-miR-23a-3p  | 2.61x10 <sup>-1</sup> | 5.23x10 <sup>-1</sup> | 0.164                     |
| hsa-miR-19b-3p  | 1.87x10 <sup>-1</sup> | 4.36x10 <sup>-1</sup> | 0.162                     |
| hsa-miR-484     | 1.27x10 <sup>-1</sup> | 3.66x10 <sup>-1</sup> | 0.162                     |
| hsa-miR-660-5p  | 4.37x10 <sup>-1</sup> | 6.91x10 <sup>-1</sup> | 0.160                     |
| hsa-miR-362-3p  | 4.89x10 <sup>-1</sup> | 7.44x10 <sup>-1</sup> | 0.153                     |
| hsa-miR-423-5p  | 1.82x10 <sup>-1</sup> | 4.31x10 <sup>-1</sup> | 0.145                     |
| hsa-miR-1-3p    | 6.03x10 <sup>-1</sup> | 8.34x10 <sup>-1</sup> | 0.141                     |
| hsa-miR-32-5p   | 2.89x10 <sup>-1</sup> | 5.48x10 <sup>-1</sup> | 0.141                     |
| hsa-miR-320e    | 3.89x10 <sup>-1</sup> | 6.59x10 <sup>-1</sup> | 0.133                     |
| hsa-miR-374a-3p | 6.28x10 <sup>-1</sup> | 8.56x10 <sup>-1</sup> | 0.131                     |
| hsa-miR-29a-5p  | 4.57x10 <sup>-1</sup> | 7.17x10 <sup>-1</sup> | 0.124                     |
| hsa-miR-19a-3p  | 3.34x10 <sup>-1</sup> | 6.03x10 <sup>-1</sup> | 0.123                     |
| hsa-miR-652-3p  | 4.22x10 <sup>-1</sup> | 6.81x10 <sup>-1</sup> | 0.112                     |
| hsa-miR-30e-5p  | 9.92x10 <sup>-2</sup> | 3.28x10 <sup>-1</sup> | 0.111                     |
| hsa-miR-200c-3p | 6.92x10 <sup>-1</sup> | 8.78x10 <sup>-1</sup> | 0.101                     |



Table SIV. Continued.

| miRNA           | P-value               | FDR corrected<br>P-value | Fold-change<br>in log <sub>2</sub> scale |
|-----------------|-----------------------|--------------------------|------------------------------------------|
| hsa-miR-10a-5p  | 5.70x10 <sup>-1</sup> | 8.16x10 <sup>-1</sup>    | 0.098                                    |
| hsa-miR-589-5p  | 3.88x10 <sup>-1</sup> | 6.59x10 <sup>-1</sup>    | 0.097                                    |
| hsa-miR-362-5p  | 5.86x10 <sup>-1</sup> | 8.26x10 <sup>-1</sup>    | 0.089                                    |
| hsa-miR-345-5p  | 3.96x10 <sup>-1</sup> | 6.59x10 <sup>-1</sup>    | 0.089                                    |
| hsa-miR-597-5p  | 7.68x10 <sup>-1</sup> | 9.05x10 <sup>-1</sup>    | 0.087                                    |
| hsa-miR-136-3p  | 7.44x10 <sup>-1</sup> | 9.05x10 <sup>-1</sup>    | 0.086                                    |
| hsa-miR-95-3p   | 7.66x10 <sup>-1</sup> | 9.05x10 <sup>-1</sup>    | 0.084                                    |
| hsa-miR-195-5p  | 5.05x10 <sup>-1</sup> | 7.59x10 <sup>-1</sup>    | 0.084                                    |
| hsa-miR-4306    | 5.44x10 <sup>-1</sup> | 7.92x10 <sup>-1</sup>    | 0.083                                    |
| hsa-miR-23c     | 6.63x10 <sup>-1</sup> | 8.75x10 <sup>-1</sup>    | 0.080                                    |
| hsa-miR-151a-3p | 5.41x10 <sup>-1</sup> | 7.92x10 <sup>-1</sup>    | 0.080                                    |
| hsa-miR-126-3p  | 4.69x10 <sup>-1</sup> | 7.29x10 <sup>-1</sup>    | 0.078                                    |
| hsa-miR-15a-5p  | 6.67x10 <sup>-1</sup> | 8.76x10 <sup>-1</sup>    | 0.072                                    |
| hsa-miR-186-5p  | 1.22x10 <sup>-1</sup> | 3.59x10 <sup>-1</sup>    | 0.071                                    |
| hsa-miR-199a-5p | 7.93x10 <sup>-1</sup> | 9.05x10 <sup>-1</sup>    | 0.070                                    |
| hsa-miR-374b-5p | 7.02x10 <sup>-1</sup> | 8.78x10 <sup>-1</sup>    | 0.069                                    |
| hsa-miR-301b-3p | 7.89x10 <sup>-1</sup> | 9.05x10 <sup>-1</sup>    | 0.069                                    |
| hsa-miR-363-3p  | 7.48x10 <sup>-1</sup> | 9.05x10 <sup>-1</sup>    | 0.069                                    |
| hsa-miR-579-3p  | 6.91x10 <sup>-1</sup> | 8.78x10 <sup>-1</sup>    | 0.067                                    |
| hsa-miR-15b-3p  | 6.42x10 <sup>-1</sup> | 8.57x10 <sup>-1</sup>    | 0.067                                    |
| hsa-miR-425-3p  | 6.78x10 <sup>-1</sup> | 8.78x10 <sup>-1</sup>    | 0.065                                    |
| hsa-miR-629-5p  | 6.94x10 <sup>-1</sup> | 8.78x10 <sup>-1</sup>    | 0.064                                    |
| hsa-miR-874-3p  | 7.82x10 <sup>-1</sup> | 9.05x10 <sup>-1</sup>    | 0.064                                    |
| hsa-miR-141-3p  | 8.20x10 <sup>-1</sup> | 9.11x10 <sup>-1</sup>    | 0.063                                    |
| hsa-miR-320c    | 6.03x10 <sup>-1</sup> | 8.34x10 <sup>-1</sup>    | 0.062                                    |
| hsa-miR-769-5p  | 6.84x10 <sup>-1</sup> | 8.78x10 <sup>-1</sup>    | 0.059                                    |
| hsa-miR-28-3p   | 6.91x10 <sup>-1</sup> | 8.78x10 <sup>-1</sup>    | 0.055                                    |
| hsa-miR-18a-5p  | 7.05x10 <sup>-1</sup> | 8.78x10 <sup>-1</sup>    | 0.053                                    |
| hsa-miR-505-3p  | 6.87x10 <sup>-1</sup> | 8.78x10 <sup>-1</sup>    | 0.053                                    |
| hsa-miR-502-3p  | 7.72x10 <sup>-1</sup> | 9.05x10 <sup>-1</sup>    | 0.051                                    |
| hsa-miR-29a-3p  | 7.61x10 <sup>-1</sup> | 9.05x10 <sup>-1</sup>    | 0.049                                    |
| hsa-miR-497-5p  | 7.74x10 <sup>-1</sup> | 9.05x10 <sup>-1</sup>    | 0.049                                    |
| hsa-miR-378a-3p | 8.09x10 <sup>-1</sup> | 9.06x10 <sup>-1</sup>    | 0.047                                    |
| hsa-miR-369-3p  | 8.92x10 <sup>-1</sup> | 9.39x10 <sup>-1</sup>    | 0.045                                    |
| hsa-miR-629-3p  | 7.48x10 <sup>-1</sup> | 9.05x10 <sup>-1</sup>    | 0.044                                    |
| hsa-miR-101-3p  | 8.29x10 <sup>-1</sup> | 9.13x10 <sup>-1</sup>    | 0.043                                    |
| hsa-miR-30b-5p  | 7.83x10 <sup>-1</sup> | 9.05x10 <sup>-1</sup>    | 0.041                                    |
| hsa-miR-106b-3p | 6.40x10 <sup>-1</sup> | 8.57x10 <sup>-1</sup>    | 0.035                                    |
| hsa-miR-27a-3p  | 8.17x10 <sup>-1</sup> | 9.11x10 <sup>-1</sup>    | 0.034                                    |
| hsa-let-7e-3p   | 8.76x10 <sup>-1</sup> | 9.38x10 <sup>-1</sup>    | 0.029                                    |
| hsa-miR-320d    | 8.04x10 <sup>-1</sup> | 9.05x10 <sup>-1</sup>    | 0.029                                    |
| hsa-miR-181a-5p | 7.95x10 <sup>-1</sup> | 9.05x10 <sup>-1</sup>    | 0.026                                    |
| hsa-miR-151a-5p | 9.02x10 <sup>-1</sup> | 9.39x10 <sup>-1</sup>    | 0.017                                    |
| hsa-miR-324-3p  | 8.70x10 <sup>-1</sup> | 9.38x10 <sup>-1</sup>    | 0.014                                    |
| hsa-miR-493-3p  | 9.63x10 <sup>-1</sup> | 9.77x10 <sup>-1</sup>    | 0.012                                    |
| hsa-miR-450a-5p | 9.90x10 <sup>-1</sup> | 9.97x10 <sup>-1</sup>    | 0.002                                    |
| hsa-miR-223-3p  | 9.99x10 <sup>-1</sup> | 9.99x10 <sup>-1</sup>    | 0.000                                    |
| hsa-miR-483-5p  | 9.95x10 <sup>-1</sup> | 9.99x10 <sup>-1</sup>    | -0.003                                   |
| hsa-miR-138-5p  | 9.82x10 <sup>-1</sup> | 9.92x10 <sup>-1</sup>    | -0.004                                   |
| hsa-miR-15a-3p  | 8.98x10 <sup>-1</sup> | 9.39x10 <sup>-1</sup>    | -0.013                                   |
| hsa-miR-338-3p  | 9.33x10 <sup>-1</sup> | 9.54x10 <sup>-1</sup>    | -0.013                                   |
| hsa-miR-92b-3p  | 9.14x10 <sup>-1</sup> | 9.39x10 <sup>-1</sup>    | -0.014                                   |
| hsa-miR-500a-3p | 9.16x10 <sup>-1</sup> | 9.39x10 <sup>-1</sup>    | -0.014                                   |
| hsa-miR-17-3p   | 9.04x10 <sup>-1</sup> | 9.39x10 <sup>-1</sup>    | -0.015                                   |
| hsa-miR-28-5p   | 9.37x10 <sup>-1</sup> | 9.54x10 <sup>-1</sup>    | -0.015                                   |

Table SIV. Continued.

| miRNA             | P-value               | FDR corrected<br>P-value | Fold-change<br>in log <sub>2</sub> scale |
|-------------------|-----------------------|--------------------------|------------------------------------------|
| hsa-miR-20a-5p    | 8.74x10 <sup>-1</sup> | 9.38x10 <sup>-1</sup>    | -0.018                                   |
| hsa-miR-302f      | 7.31x10 <sup>-1</sup> | 8.98x10 <sup>-1</sup>    | -0.018                                   |
| hsa-miR-181a-2-3p | 8.75x10 <sup>-1</sup> | 9.38x10 <sup>-1</sup>    | -0.018                                   |
| hsa-miR-132-3p    | 8.78x10 <sup>-1</sup> | 9.38x10 <sup>-1</sup>    | -0.021                                   |
| hsa-miR-125a-3p   | 8.93x10 <sup>-1</sup> | 9.39x10 <sup>-1</sup>    | -0.022                                   |
| hsa-let-7f-5p     | 9.14x10 <sup>-1</sup> | 9.39x10 <sup>-1</sup>    | -0.023                                   |
| hsa-miR-30a-5p    | 9.04x10 <sup>-1</sup> | 9.39x10 <sup>-1</sup>    | -0.025                                   |
| hsa-miR-133a-3p   | 9.14x10 <sup>-1</sup> | 9.39x10 <sup>-1</sup>    | -0.029                                   |
| hsa-miR-139-5p    | 8.26x10 <sup>-1</sup> | 9.13x10 <sup>-1</sup>    | -0.036                                   |
| hsa-miR-221-5p    | 8.04x10 <sup>-1</sup> | 9.05x10 <sup>-1</sup>    | -0.038                                   |
| hsa-miR-339-3p    | 8.55x10 <sup>-1</sup> | 9.31x10 <sup>-1</sup>    | -0.038                                   |
| hsa-miR-185-5p    | 6.75x10 <sup>-1</sup> | 8.78x10 <sup>-1</sup>    | -0.041                                   |
| hsa-miR-378a-5p   | 8.04x10 <sup>-1</sup> | 9.05x10 <sup>-1</sup>    | -0.041                                   |
| hsa-miR-194-5p    | 8.90x10 <sup>-1</sup> | 9.39x10 <sup>-1</sup>    | -0.044                                   |
| hsa-miR-101-5p    | 7.87x10 <sup>-1</sup> | 9.05x10 <sup>-1</sup>    | -0.048                                   |
| hsa-miR-92a-3p    | 7.77x10 <sup>-1</sup> | 9.05x10 <sup>-1</sup>    | -0.048                                   |
| hsa-let-7i-5p     | 2.79x10 <sup>-1</sup> | 5.36x10 <sup>-1</sup>    | -0.053                                   |
| hsa-miR-30c-5p    | 7.19x10 <sup>-1</sup> | 8.90x10 <sup>-1</sup>    | -0.057                                   |
| hsa-miR-493-5p    | 8.49x10 <sup>-1</sup> | 9.28x10 <sup>-1</sup>    | -0.062                                   |
| hsa-miR-532-3p    | 5.63x10 <sup>-1</sup> | 8.16x10 <sup>-1</sup>    | -0.066                                   |
| hsa-miR-17-5p     | 4.24x10 <sup>-1</sup> | 6.81x10 <sup>-1</sup>    | -0.073                                   |
| hsa-miR-181b-5p   | 6.15x10 <sup>-1</sup> | 8.47x10 <sup>-1</sup>    | -0.074                                   |
| hsa-miR-654-3p    | 8.05x10 <sup>-1</sup> | 9.05x10 <sup>-1</sup>    | -0.085                                   |
| hsa-miR-411-3p    | 8.35x10 <sup>-1</sup> | 9.17x10 <sup>-1</sup>    | -0.085                                   |
| hsa-miR-320b      | 5.25x10 <sup>-1</sup> | 7.76x10 <sup>-1</sup>    | -0.087                                   |
| hsa-miR-628-5p    | 6.33x10 <sup>-1</sup> | 8.56x10 <sup>-1</sup>    | -0.092                                   |
| hsa-miR-550a-5p   | 5.88x10 <sup>-1</sup> | 8.26x10 <sup>-1</sup>    | -0.094                                   |
| hsa-miR-330-3p    | 7.05x10 <sup>-1</sup> | 8.78x10 <sup>-1</sup>    | -0.096                                   |
| hsa-miR-106a-5p   | 1.94x10 <sup>-1</sup> | 4.41x10 <sup>-1</sup>    | -0.096                                   |
| hsa-miR-377-3p    | 7.32x10 <sup>-1</sup> | 8.98x10 <sup>-1</sup>    | -0.096                                   |
| hsa-miR-33a-5p    | 7.06x10 <sup>-1</sup> | 8.78x10 <sup>-1</sup>    | -0.101                                   |
| hsa-miR-365a-3p   | 7.52x10 <sup>-1</sup> | 9.05x10 <sup>-1</sup>    | -0.102                                   |
| hsa-let-7a-5p     | 5.68x10 <sup>-1</sup> | 8.16x10 <sup>-1</sup>    | -0.104                                   |
| hsa-miR-211-5p    | 6.30x10 <sup>-1</sup> | 8.56x10 <sup>-1</sup>    | -0.105                                   |
| hsa-miR-503-5p    | 6.46x10 <sup>-1</sup> | 8.57x10 <sup>-1</sup>    | -0.110                                   |
| hsa-miR-133b      | 6.47x10 <sup>-1</sup> | 8.57x10 <sup>-1</sup>    | -0.121                                   |
| hsa-miR-532-5p    | 4.36x10 <sup>-1</sup> | 6.91x10 <sup>-1</sup>    | -0.122                                   |
| hsa-miR-25-3p     | 5.44x10 <sup>-1</sup> | 7.92x10 <sup>-1</sup>    | -0.126                                   |
| hsa-miR-206       | 7.94x10 <sup>-1</sup> | 9.05x10 <sup>-1</sup>    | -0.127                                   |
| hsa-miR-103a-3p   | 1.23x10 <sup>-1</sup> | 3.59x10 <sup>-1</sup>    | -0.128                                   |
| hsa-miR-140-3p    | 2.24x10 <sup>-1</sup> | 4.68x10 <sup>-1</sup>    | -0.131                                   |
| hsa-miR-337-5p    | 6.33x10 <sup>-1</sup> | 8.56x10 <sup>-1</sup>    | -0.132                                   |
| hsa-miR-181d-5p   | 5.92x10 <sup>-1</sup> | 8.28x10 <sup>-1</sup>    | -0.138                                   |
| hsa-miR-222-3p    | 8.96x10 <sup>-2</sup> | 3.28x10 <sup>-1</sup>    | -0.150                                   |
| hsa-miR-337-3p    | 5.75x10 <sup>-1</sup> | 8.20x10 <sup>-1</sup>    | -0.157                                   |
| hsa-miR-374a-5p   | 4.72x10 <sup>-1</sup> | 7.29x10 <sup>-1</sup>    | -0.159                                   |
| hsa-miR-374c-5p   | 4.71x10 <sup>-1</sup> | 7.29x10 <sup>-1</sup>    | -0.160                                   |
| hsa-miR-99b-5p    | 3.20x10 <sup>-1</sup> | 5.84x10 <sup>-1</sup>    | -0.162                                   |
| hsa-miR-425-5p    | 3.45x10 <sup>-2</sup> | 1.70x10 <sup>-1</sup>    | -0.162                                   |
| hsa-miR-18b-5p    | 1.46x10 <sup>-1</sup> | 3.83x10 <sup>-1</sup>    | -0.165                                   |
| hsa-miR-93-3p     | 3.23x10 <sup>-2</sup> | 1.68x10 <sup>-1</sup>    | -0.171                                   |
| hsa-miR-491-5p    | 3.92x10 <sup>-1</sup> | 6.59x10 <sup>-1</sup>    | -0.171                                   |
| hsa-miR-106b-5p   | 1.41x10 <sup>-1</sup> | 3.83x10 <sup>-1</sup>    | -0.179                                   |
| hsa-miR-219a-5p   | 9.71x10 <sup>-2</sup> | 3.28x10 <sup>-1</sup>    | -0.180                                   |
| hsa-miR-29b-2-5p  | 1.04x10 <sup>-1</sup> | 3.31x10 <sup>-1</sup>    | -0.181                                   |

Table SIV. Continued.

| miRNA           | P-value               | FDR corrected<br>P-value | Fold-change<br>in log <sub>2</sub> scale |
|-----------------|-----------------------|--------------------------|------------------------------------------|
| hsa-miR-99b-3p  | 2.78x10 <sup>-1</sup> | 5.36x10 <sup>-1</sup>    | -0.184                                   |
| hsa-miR-16-5p   | 3.70x10 <sup>-1</sup> | 6.46x10 <sup>-1</sup>    | -0.189                                   |
| hsa-miR-135a-5p | 2.21x10 <sup>-1</sup> | 4.67x10 <sup>-1</sup>    | -0.197                                   |
| hsa-miR-299-3p  | 4.90x10 <sup>-1</sup> | 7.44x10 <sup>-1</sup>    | -0.201                                   |
| hsa-miR-193a-5p | 5.78x10 <sup>-1</sup> | 8.20x10 <sup>-1</sup>    | -0.202                                   |
| hsa-miR-539-5p  | 3.96x10 <sup>-1</sup> | 6.59x10 <sup>-1</sup>    | -0.215                                   |
| hsa-miR-224-5p  | 4.26x10 <sup>-1</sup> | 6.81x10 <sup>-1</sup>    | -0.221                                   |
| hsa-miR-29b-3p  | 1.01x10 <sup>-1</sup> | 3.29x10 <sup>-1</sup>    | -0.221                                   |
| hsa-miR-125a-5p | 2.04x10 <sup>-1</sup> | 4.54x10 <sup>-1</sup>    | -0.229                                   |
| hsa-miR-20b-5p  | 3.06x10 <sup>-1</sup> | 5.70x10 <sup>-1</sup>    | -0.231                                   |
| hsa-miR-191-5p  | 1.91x10 <sup>-1</sup> | 4.40x10 <sup>-1</sup>    | -0.233                                   |
| hsa-miR-107     | 9.65x10 <sup>-2</sup> | 3.28x10 <sup>-1</sup>    | -0.245                                   |
| hsa-miR-301a-3p | 9.68x10 <sup>-2</sup> | 3.28x10 <sup>-1</sup>    | -0.245                                   |
| hsa-miR-381-3p  | 2.96x10 <sup>-1</sup> | 5.55x10 <sup>-1</sup>    | -0.253                                   |
| hsa-miR-324-5p  | 8.81x10 <sup>-2</sup> | 3.28x10 <sup>-1</sup>    | -0.255                                   |
| hsa-let-7b-5p   | 9.07x10 <sup>-3</sup> | 8.17x10 <sup>-2</sup>    | -0.260                                   |
| hsa-miR-96-5p   | 4.85x10 <sup>-1</sup> | 7.44x10 <sup>-1</sup>    | -0.265                                   |
| hsa-miR-34b-5p  | 4.14x10 <sup>-1</sup> | 6.80x10 <sup>-1</sup>    | -0.267                                   |
| hsa-miR-451a    | 3.94x10 <sup>-1</sup> | 6.59x10 <sup>-1</sup>    | -0.274                                   |
| hsa-miR-192-5p  | 3.60x10 <sup>-1</sup> | 6.32x10 <sup>-1</sup>    | -0.288                                   |
| hsa-miR-30e-3p  | 4.44x10 <sup>-2</sup> | 1.98x10 <sup>-1</sup>    | -0.296                                   |
| hsa-miR-154-5p  | 2.77x10 <sup>-1</sup> | 5.36x10 <sup>-1</sup>    | -0.297                                   |
| hsa-miR-551b-3p | 1.16x10 <sup>-1</sup> | 3.59x10 <sup>-1</sup>    | -0.316                                   |
| hsa-miR-127-3p  | 3.14x10 <sup>-1</sup> | 5.77x10 <sup>-1</sup>    | -0.319                                   |
| hsa-miR-376b-3p | 3.14x10 <sup>-1</sup> | 5.77x10 <sup>-1</sup>    | -0.324                                   |
| hsa-miR-134-5p  | 1.94x10 <sup>-1</sup> | 4.41x10 <sup>-1</sup>    | -0.327                                   |
| hsa-miR-501-5p  | 4.07x10 <sup>-2</sup> | 1.91x10 <sup>-1</sup>    | -0.332                                   |
| hsa-miR-495-3p  | 2.47x10 <sup>-1</sup> | 4.99x10 <sup>-1</sup>    | -0.335                                   |
| hsa-miR-455-5p  | 5.05x10 <sup>-1</sup> | 7.59x10 <sup>-1</sup>    | -0.336                                   |
| hsa-miR-485-5p  | 2.67x10 <sup>-1</sup> | 5.32x10 <sup>-1</sup>    | -0.344                                   |
| hsa-miR-654-5p  | 2.77x10 <sup>-1</sup> | 5.36x10 <sup>-1</sup>    | -0.351                                   |
| hsa-miR-382-5p  | 2.25x10 <sup>-1</sup> | 4.68x10 <sup>-1</sup>    | -0.353                                   |
| hsa-miR-216a-5p | 4.27x10 <sup>-1</sup> | 6.81x10 <sup>-1</sup>    | -0.362                                   |
| hsa-miR-18a-3p  | 1.01x10 <sup>-3</sup> | 2.03x10 <sup>-2</sup>    | -0.370                                   |
| hsa-miR-145-5p  | 3.21x10 <sup>-2</sup> | 1.68x10 <sup>-1</sup>    | -0.371                                   |
| hsa-let-7g-5p   | 9.85x10 <sup>-3</sup> | 8.17x10 <sup>-2</sup>    | -0.371                                   |
| hsa-miR-99a-5p  | 2.07x10 <sup>-1</sup> | 4.57x10 <sup>-1</sup>    | -0.371                                   |
| hsa-miR-500a-5p | 1.88x10 <sup>-2</sup> | 1.15x10 <sup>-1</sup>    | -0.374                                   |
| hsa-miR-193b-3p | 2.87x10 <sup>-1</sup> | 5.48x10 <sup>-1</sup>    | -0.375                                   |
| hsa-miR-199b-5p | 4.60x10 <sup>-2</sup> | 2.02x10 <sup>-1</sup>    | -0.385                                   |
| hsa-miR-454-3p  | 1.19x10 <sup>-2</sup> | 8.74x10 <sup>-2</sup>    | -0.394                                   |
| hsa-miR-486-5p  | 1.35x10 <sup>-1</sup> | 3.80x10 <sup>-1</sup>    | -0.401                                   |
| hsa-miR-125b-5p | 1.52x10 <sup>-1</sup> | 3.96x10 <sup>-1</sup>    | -0.402                                   |
| hsa-miR-369-5p  | 1.82x10 <sup>-1</sup> | 4.31x10 <sup>-1</sup>    | -0.411                                   |
| hsa-miR-431-5p  | 2.27x10 <sup>-1</sup> | 4.68x10 <sup>-1</sup>    | -0.414                                   |
| hsa-miR-144-3p  | 2.69x10 <sup>-1</sup> | 5.32x10 <sup>-1</sup>    | -0.415                                   |
| hsa-miR-10b-5p  | 2.15x10 <sup>-1</sup> | 4.64x10 <sup>-1</sup>    | -0.422                                   |
| hsa-miR-411-5p  | 1.88x10 <sup>-1</sup> | 4.36x10 <sup>-1</sup>    | -0.424                                   |
| hsa-miR-136-5p  | 9.64x10 <sup>-2</sup> | 3.28x10 <sup>-1</sup>    | -0.470                                   |
| hsa-miR-379-5p  | 1.43x10 <sup>-1</sup> | 3.83x10 <sup>-1</sup>    | -0.475                                   |
| hsa-miR-432-5p  | 1.38x10 <sup>-1</sup> | 3.83x10 <sup>-1</sup>    | -0.491                                   |
| hsa-miR-485-3p  | 1.21x10 <sup>-1</sup> | 3.59x10 <sup>-1</sup>    | -0.520                                   |
| hsa-miR-487b-3p | 9.88x10 <sup>-2</sup> | 3.28x10 <sup>-1</sup>    | -0.521                                   |
| hsa-miR-4732-3p | 9.40x10 <sup>-2</sup> | 3.28x10 <sup>-1</sup>    | -0.551                                   |
| hsa-miR-183-5p  | 6.26x10 <sup>-2</sup> | 2.58x10 <sup>-1</sup>    | -0.639                                   |

Table SIV. Continued.

| miRNA          | P-value               | FDR corrected<br>P-value | Fold-change<br>in log <sub>2</sub> scale |
|----------------|-----------------------|--------------------------|------------------------------------------|
| hsa-miR-27a-5p | 1.26x10 <sup>-3</sup> | 2.13x10 <sup>-2</sup>    | -0.657                                   |
| hsa-miR-342-5p | 3.75x10 <sup>-4</sup> | 1.46x10 <sup>-2</sup>    | -0.675                                   |
| hsa-miR-215-5p | 3.31x10 <sup>-2</sup> | 1.69x10 <sup>-1</sup>    | -0.729                                   |
| hsa-miR-214-3p | 3.83x10 <sup>-2</sup> | 1.83x10 <sup>-1</sup>    | -0.810                                   |
| hsa-miR-205-5p | 4.21x10 <sup>-2</sup> | 1.91x10 <sup>-1</sup>    | -0.867                                   |
| hsa-miR-150-3p | 4.06x10 <sup>-3</sup> | 4.56x10 <sup>-2</sup>    | -0.877                                   |
| hsa-miR-375    | 4.71x10 <sup>-2</sup> | 2.04x10 <sup>-1</sup>    | -0.883                                   |
| hsa-miR-150-5p | 2.04x10 <sup>-3</sup> | 2.87x10 <sup>-2</sup>    | -1.012                                   |

FDR, false discovery rate.

Table SV. miRNA expression comparison of the groups of pancreatic ductal adenocarcinoma patients (PDAC). Group 1, patients with resectable, non-metastatic disease; Group 2, patients with non-resectable disease without evidence of metastases; Group 3 patients with metastatic disease.

| A, miRNA expression comparison of all three groups |                       |                                                            |                                                            |
|----------------------------------------------------|-----------------------|------------------------------------------------------------|------------------------------------------------------------|
| miRNA ID                                           | P-value               | Fold-change in log <sub>2</sub> scale, group 1 vs. group 2 | Fold-change in log <sub>2</sub> scale, group 3 vs. group 2 |
| hsa-miR-193a-5p                                    | 4.85x10 <sup>-2</sup> | -0.075                                                     | 0.899                                                      |
| hsa-miR-4257                                       | 1.09x10 <sup>-1</sup> | 0.621                                                      | 0.863                                                      |
| hsa-miR-193b-3p                                    | 5.14x10 <sup>-2</sup> | -0.291                                                     | 0.856                                                      |
| hsa-miR-365a-3p                                    | 4.00x10 <sup>-2</sup> | -0.171                                                     | 0.844                                                      |
| hsa-miR-99a-5p                                     | 7.03x10 <sup>-2</sup> | -0.202                                                     | 0.702                                                      |
| hsa-miR-216a-5p                                    | 2.38x10 <sup>-1</sup> | 0.296                                                      | 0.673                                                      |
| hsa-miR-192-5p                                     | 1.44x10 <sup>-1</sup> | -0.206                                                     | 0.656                                                      |
| hsa-miR-483-5p                                     | 2.96x10 <sup>-1</sup> | -0.023                                                     | 0.648                                                      |
| hsa-miR-483-3p                                     | 2.33x10 <sup>-1</sup> | 0.085                                                      | 0.625                                                      |
| hsa-miR-1290                                       | 1.46x10 <sup>-1</sup> | 0.274                                                      | 0.604                                                      |
| hsa-miR-214-3p                                     | 3.60x10 <sup>-1</sup> | -0.343                                                     | 0.579                                                      |
| hsa-miR-215-5p                                     | 2.53x10 <sup>-1</sup> | -0.399                                                     | 0.575                                                      |
| hsa-miR-34a-3p                                     | 9.96x10 <sup>-2</sup> | 0.376                                                      | 0.544                                                      |
| hsa-miR-125b-5p                                    | 1.70x10 <sup>-1</sup> | -0.157                                                     | 0.538                                                      |
| hsa-miR-1207-5p                                    | 3.73x10 <sup>-1</sup> | 0.242                                                      | 0.530                                                      |
| hsa-miR-378a-3p                                    | 3.75x10 <sup>-2</sup> | -0.293                                                     | 0.505                                                      |
| hsa-miR-194-5p                                     | 3.54x10 <sup>-1</sup> | -0.254                                                     | 0.492                                                      |
| hsa-miR-34a-5p                                     | 2.14x10 <sup>-1</sup> | 0.102                                                      | 0.489                                                      |
| hsa-miR-650                                        | 5.05x10 <sup>-1</sup> | 0.218                                                      | 0.473                                                      |
| hsa-miR-1299                                       | 3.36x10 <sup>-1</sup> | -0.647                                                     | 0.459                                                      |
| hsa-miR-378a-5p                                    | 2.59x10 <sup>-2</sup> | -0.242                                                     | 0.445                                                      |
| hsa-miR-205-5p                                     | 5.67x10 <sup>-1</sup> | -0.471                                                     | 0.434                                                      |
| hsa-miR-10b-5p                                     | 4.73x10 <sup>-1</sup> | -0.065                                                     | 0.433                                                      |
| hsa-miR-1291                                       | 2.87x10 <sup>-1</sup> | 0.246                                                      | 0.422                                                      |
| hsa-miR-362-3p                                     | 1.73x10 <sup>-1</sup> | -0.211                                                     | 0.421                                                      |
| hsa-miR-144-3p                                     | 5.77x10 <sup>-1</sup> | -0.346                                                     | 0.410                                                      |
| hsa-miR-1825                                       | 4.70x10 <sup>-1</sup> | 0.349                                                      | 0.402                                                      |
| hsa-miR-30a-5p                                     | 1.49x10 <sup>-1</sup> | -0.334                                                     | 0.401                                                      |
| hsa-miR-95-3p                                      | 4.35x10 <sup>-1</sup> | -0.203                                                     | 0.397                                                      |
| hsa-miR-620                                        | 5.94x10 <sup>-1</sup> | 0.122                                                      | 0.384                                                      |
| hsa-miR-365b-5p                                    | 5.02x10 <sup>-1</sup> | 0.327                                                      | 0.384                                                      |
| hsa-miR-34b-3p                                     | 4.72x10 <sup>-1</sup> | 0.311                                                      | 0.380                                                      |
| hsa-miR-375                                        | 5.95x10 <sup>-1</sup> | -0.534                                                     | 0.376                                                      |
| hsa-miR-486-5p                                     | 3.92x10 <sup>-1</sup> | -0.259                                                     | 0.374                                                      |
| hsa-miR-451a                                       | 5.59x10 <sup>-1</sup> | -0.262                                                     | 0.368                                                      |
| hsa-miR-20b-5p                                     | 3.07x10 <sup>-1</sup> | -0.137                                                     | 0.362                                                      |
| hsa-miR-1275                                       | 4.99x10 <sup>-1</sup> | 0.150                                                      | 0.360                                                      |
| hsa-let-7b-3p                                      | 1.45x10 <sup>-1</sup> | -0.099                                                     | 0.358                                                      |
| hsa-miR-145-5p                                     | 9.69x10 <sup>-2</sup> | -0.238                                                     | 0.355                                                      |
| hsa-miR-29a-3p                                     | 9.96x10 <sup>-2</sup> | -0.266                                                     | 0.354                                                      |
| hsa-miR-143-3p                                     | 1.14x10 <sup>-1</sup> | -0.135                                                     | 0.353                                                      |
| hsa-miR-660-5p                                     | 2.49x10 <sup>-1</sup> | -0.258                                                     | 0.348                                                      |
| hsa-miR-596                                        | 5.63x10 <sup>-1</sup> | 0.385                                                      | 0.344                                                      |
| hsa-miR-4732-3p                                    | 6.14x10 <sup>-1</sup> | -0.151                                                     | 0.343                                                      |
| hsa-miR-148a-3p                                    | 8.34x10 <sup>-2</sup> | -0.057                                                     | 0.324                                                      |
| hsa-miR-502-3p                                     | 1.90x10 <sup>-1</sup> | -0.198                                                     | 0.324                                                      |
| hsa-miR-96-5p                                      | 6.74x10 <sup>-1</sup> | -0.356                                                     | 0.323                                                      |

Table SV. Continued.

| miRNA ID          | P-value               | Fold-change in log <sub>2</sub> scale, group 1 vs. group 2 | Fold-change in log <sub>2</sub> scale, group 3 vs. group 2 |
|-------------------|-----------------------|------------------------------------------------------------|------------------------------------------------------------|
| hsa-miR-455-5p    | 7.99x10 <sup>-1</sup> | -0.370                                                     | 0.316                                                      |
| hsa-miR-500a-3p   | 6.62x10 <sup>-2</sup> | -0.099                                                     | 0.315                                                      |
| hsa-miR-497-5p    | 1.43x10 <sup>-1</sup> | -0.320                                                     | 0.312                                                      |
| hsa-miR-621       | 6.21x10 <sup>-1</sup> | 0.325                                                      | 0.293                                                      |
| hsa-miR-550a-5p   | 2.74x10 <sup>-1</sup> | -0.088                                                     | 0.275                                                      |
| hsa-miR-29c-3p    | 9.60x10 <sup>-2</sup> | -0.304                                                     | 0.267                                                      |
| hsa-miR-27a-5p    | 3.29x10 <sup>-1</sup> | 0.031                                                      | 0.264                                                      |
| hsa-miR-609       | 4.71x10 <sup>-1</sup> | 0.585                                                      | 0.262                                                      |
| hsa-miR-616-5p    | 2.55x10 <sup>-1</sup> | 0.235                                                      | 0.256                                                      |
| hsa-miR-101-5p    | 3.37x10 <sup>-1</sup> | -0.257                                                     | 0.251                                                      |
| hsa-miR-505-3p    | 1.63x10 <sup>-1</sup> | 0.012                                                      | 0.250                                                      |
| hsa-miR-532-5p    | 2.80x10 <sup>-1</sup> | -0.186                                                     | 0.243                                                      |
| hsa-miR-16-5p     | 5.03x10 <sup>-1</sup> | -0.242                                                     | 0.241                                                      |
| hsa-miR-616-3p    | 3.62x10 <sup>-1</sup> | 0.462                                                      | 0.233                                                      |
| hsa-miR-92a-3p    | 3.62x10 <sup>-1</sup> | -0.189                                                     | 0.233                                                      |
| hsa-miR-22-3p     | 2.02x10 <sup>-1</sup> | -0.145                                                     | 0.231                                                      |
| hsa-miR-25-3p     | 5.99x10 <sup>-1</sup> | -0.072                                                     | 0.221                                                      |
| hsa-miR-132-3p    | 2.90x10 <sup>-1</sup> | -0.176                                                     | 0.217                                                      |
| hsa-miR-206       | 7.19x10 <sup>-1</sup> | 0.393                                                      | 0.211                                                      |
| hsa-miR-720 (v18) | 6.29x10 <sup>-1</sup> | 0.208                                                      | 0.207                                                      |
| hsa-let-7f-1-3p   | 1.31x10 <sup>-1</sup> | 0.026                                                      | 0.204                                                      |
| hsa-miR-19b-3p    | 2.74x10 <sup>-1</sup> | -0.166                                                     | 0.195                                                      |
| hsa-miR-363-3p    | 6.73x10 <sup>-1</sup> | 0.002                                                      | 0.193                                                      |
| hsa-miR-92b-3p    | 2.64x10 <sup>-1</sup> | -0.178                                                     | 0.192                                                      |
| hsa-miR-362-5p    | 4.44x10 <sup>-1</sup> | -0.233                                                     | 0.191                                                      |
| hsa-miR-101-3p    | 6.11x10 <sup>-1</sup> | -0.211                                                     | 0.189                                                      |
| hsa-miR-4306      | 3.80x10 <sup>-1</sup> | -0.184                                                     | 0.178                                                      |
| hsa-miR-183-5p    | 8.08x10 <sup>-1</sup> | -0.284                                                     | 0.177                                                      |
| hsa-miR-25-5p     | 6.34x10 <sup>-1</sup> | 0.153                                                      | 0.176                                                      |
| hsa-miR-532-3p    | 1.95x10 <sup>-1</sup> | -0.210                                                     | 0.175                                                      |
| hsa-miR-195-5p    | 3.72x10 <sup>-1</sup> | -0.064                                                     | 0.174                                                      |
| hsa-miR-27b-3p    | 5.55x10 <sup>-1</sup> | -0.084                                                     | 0.169                                                      |
| hsa-miR-320b      | 4.18x10 <sup>-1</sup> | -0.136                                                     | 0.166                                                      |
| hsa-miR-331-5p    | 1.84x10 <sup>-1</sup> | 0.031                                                      | 0.164                                                      |
| hsa-miR-200c-5p   | 8.04x10 <sup>-1</sup> | 0.326                                                      | 0.156                                                      |
| hsa-let-7a-3p     | 4.75x10 <sup>-1</sup> | 0.116                                                      | 0.154                                                      |
| hsa-miR-1285-3p   | 3.34x10 <sup>-1</sup> | 0.117                                                      | 0.152                                                      |
| hsa-miR-576-5p    | 5.92x10 <sup>-1</sup> | -0.025                                                     | 0.152                                                      |
| hsa-miR-320e      | 6.54x10 <sup>-1</sup> | -0.071                                                     | 0.148                                                      |
| hsa-miR-29b-3p    | 4.50x10 <sup>-1</sup> | -0.207                                                     | 0.139                                                      |
| hsa-miR-29b-2-5p  | 3.86x10 <sup>-1</sup> | 0.058                                                      | 0.138                                                      |
| hsa-miR-199b-5p   | 7.44x10 <sup>-1</sup> | 0.036                                                      | 0.136                                                      |
| hsa-miR-423-5p    | 3.56x10 <sup>-1</sup> | 0.040                                                      | 0.136                                                      |
| hsa-miR-135b-5p   | 9.61x10 <sup>-1</sup> | -0.086                                                     | 0.136                                                      |
| hsa-miR-15a-5p    | 7.44x10 <sup>-1</sup> | -0.014                                                     | 0.135                                                      |
| hsa-miR-338-5p    | 6.00x10 <sup>-1</sup> | 0.028                                                      | 0.135                                                      |
| hsa-miR-342-5p    | 6.38x10 <sup>-1</sup> | -0.214                                                     | 0.131                                                      |
| hsa-miR-627-5p    | 4.54x10 <sup>-1</sup> | -0.235                                                     | 0.130                                                      |
| hsa-miR-204-5p    | 3.96x10 <sup>-1</sup> | -0.372                                                     | 0.126                                                      |
| hsa-miR-29c-5p    | 2.23x10 <sup>-1</sup> | -0.012                                                     | 0.124                                                      |
| hsa-miR-196a-5p   | 4.21x10 <sup>-1</sup> | 0.568                                                      | 0.123                                                      |
| hsa-miR-19a-3p    | 6.42x10 <sup>-1</sup> | -0.109                                                     | 0.118                                                      |
| hsa-miR-374a-3p   | 7.31x10 <sup>-1</sup> | 0.141                                                      | 0.118                                                      |

Table SV. Continued.

| miRNA ID           | P-value               | Fold-change<br>in log <sub>2</sub> scale,<br>group 1 vs.<br>group 2 | Fold-change<br>in log <sub>2</sub> scale,<br>group 3 vs.<br>group 2 |
|--------------------|-----------------------|---------------------------------------------------------------------|---------------------------------------------------------------------|
| hsa-miR-21-5p      | 6.61x10 <sup>-1</sup> | 0.021                                                               | 0.115                                                               |
| hsa-let-7f-2-3p    | 8.19x10 <sup>-1</sup> | 0.037                                                               | 0.113                                                               |
| hsa-miR-874-3p     | 6.31x10 <sup>-1</sup> | 0.238                                                               | 0.113                                                               |
| hsa-miR-140-3p     | 3.77x10 <sup>-1</sup> | -0.178                                                              | 0.112                                                               |
| hsa-miR-29a-5p     | 8.05x10 <sup>-1</sup> | -0.029                                                              | 0.111                                                               |
| hsa-miR-21-3p      | 7.59x10 <sup>-1</sup> | -0.046                                                              | 0.099                                                               |
| hsa-miR-15b-3p     | 8.07x10 <sup>-1</sup> | -0.074                                                              | 0.099                                                               |
| hsa-miR-10a-3p     | 9.30x10 <sup>-1</sup> | -0.012                                                              | 0.094                                                               |
| hsa-miR-361-5p     | 6.40x10 <sup>-1</sup> | -0.083                                                              | 0.089                                                               |
| hsa-miR-136-3p     | 9.51x10 <sup>-1</sup> | -0.039                                                              | 0.085                                                               |
| hsa-miR-24-3p      | 7.95x10 <sup>-1</sup> | -0.039                                                              | 0.084                                                               |
| hsa-miR-200b-3p    | 5.26x10 <sup>-1</sup> | -0.549                                                              | 0.081                                                               |
| hsa-miR-589-5p     | 4.65x10 <sup>-1</sup> | 0.112                                                               | 0.079                                                               |
| hsa-miR-320d       | 8.10x10 <sup>-1</sup> | -0.044                                                              | 0.075                                                               |
| hsa-miR-629-3p     | 5.22x10 <sup>-1</sup> | 0.159                                                               | 0.074                                                               |
| hsa-miR-185-5p     | 7.75x10 <sup>-1</sup> | -0.021                                                              | 0.072                                                               |
| hsa-miR-219a-5p    | 8.20x10 <sup>-1</sup> | -0.012                                                              | 0.068                                                               |
| hsa-miR-15a-3p     | 6.61x10 <sup>-1</sup> | 0.059                                                               | 0.068                                                               |
| hsa-miR-320a       | 8.04x10 <sup>-1</sup> | -0.096                                                              | 0.066                                                               |
| hsa-miR-103a-3p    | 7.25x10 <sup>-1</sup> | -0.074                                                              | 0.064                                                               |
| hsa-miR-302f       | 4.43x10 <sup>-1</sup> | -0.050                                                              | 0.063                                                               |
| hsa-miR-152-3p     | 7.79x10 <sup>-1</sup> | 0.053                                                               | 0.062                                                               |
| hsa-miR-138-5p     | 6.46x10 <sup>-2</sup> | -0.598                                                              | 0.061                                                               |
| hsa-miR-500a-5p    | 7.91x10 <sup>-1</sup> | -0.154                                                              | 0.060                                                               |
| hsa-miR-320c       | 8.32x10 <sup>-1</sup> | -0.080                                                              | 0.060                                                               |
| hsa-miR-501-5p     | 8.86x10 <sup>-1</sup> | 0.051                                                               | 0.059                                                               |
| hsa-miR-30e-5p     | 5.80x10 <sup>-2</sup> | -0.232                                                              | 0.058                                                               |
| hsa-miR-484        | 5.50x10 <sup>-1</sup> | -0.174                                                              | 0.057                                                               |
| hsa-miR-197-3p     | 8.70x10 <sup>-1</sup> | -0.011                                                              | 0.055                                                               |
| hsa-miR-17-3p      | 3.99x10 <sup>-1</sup> | -0.235                                                              | 0.052                                                               |
| hsa-miR-20a-5p     | 5.09x10 <sup>-1</sup> | -0.189                                                              | 0.052                                                               |
| hsa-miR-93-3p      | 7.72x10 <sup>-1</sup> | -0.063                                                              | 0.050                                                               |
| hsa-miR-425-5p     | 8.20x10 <sup>-1</sup> | -0.018                                                              | 0.049                                                               |
| hsa-miR-150-5p     | 5.71x10 <sup>-1</sup> | -0.493                                                              | 0.043                                                               |
| hsa-miR-324-3p     | 6.10x10 <sup>-1</sup> | -0.119                                                              | 0.042                                                               |
| hsa-miR-1271-5p    | 8.28x10 <sup>-1</sup> | 0.100                                                               | 0.040                                                               |
| hsa-let-7d-3p      | 8.63x10 <sup>-1</sup> | -0.082                                                              | 0.040                                                               |
| hsa-miR-452-5p     | 4.09x10 <sup>-1</sup> | 0.389                                                               | 0.038                                                               |
| hsa-miR-454-5p     | 9.39x10 <sup>-1</sup> | -0.055                                                              | 0.038                                                               |
| hsa-miR-629-5p     | 9.69x10 <sup>-1</sup> | -0.043                                                              | 0.036                                                               |
| hsa-miR-1280 (v18) | 8.64x10 <sup>-1</sup> | 0.085                                                               | 0.033                                                               |
| hsa-miR-518b       | 2.73x10 <sup>-1</sup> | 1.142                                                               | 0.033                                                               |
| hsa-miR-579-3p     | 1.44x10 <sup>-1</sup> | 0.464                                                               | 0.033                                                               |
| hsa-miR-106b-5p    | 8.47x10 <sup>-1</sup> | -0.104                                                              | 0.032                                                               |
| hsa-miR-9-3p       | 7.85x10 <sup>-1</sup> | 0.161                                                               | 0.030                                                               |
| hsa-miR-335-5p     | 9.69x10 <sup>-1</sup> | 0.000                                                               | 0.030                                                               |
| hsa-miR-18a-3p     | 8.99x10 <sup>-1</sup> | -0.075                                                              | 0.019                                                               |
| hsa-miR-30c-5p     | 9.89x10 <sup>-1</sup> | 0.016                                                               | 0.019                                                               |
| hsa-miR-770-5p     | 8.37x10 <sup>-1</sup> | 0.249                                                               | 0.018                                                               |
| hsa-miR-345-5p     | 9.33x10 <sup>-1</sup> | -0.054                                                              | 0.017                                                               |
| hsa-let-7i-5p      | 9.35x10 <sup>-1</sup> | -0.025                                                              | 0.010                                                               |
| hsa-miR-10a-5p     | 9.52x10 <sup>-1</sup> | 0.075                                                               | 0.008                                                               |
| hsa-let-7e-3p      | 6.24x10 <sup>-1</sup> | -0.251                                                              | 0.006                                                               |

Table SV. Continued.

| miRNA ID          | P-value               | Fold-change<br>in log <sub>2</sub> scale,<br>group 1 vs.<br>group 2 | Fold-change<br>in log <sub>2</sub> scale,<br>group 3 vs.<br>group 2 |
|-------------------|-----------------------|---------------------------------------------------------------------|---------------------------------------------------------------------|
| hsa-miR-651-5p    | 9.76x10 <sup>-1</sup> | 0.045                                                               | 0.005                                                               |
| hsa-miR-32-5p     | 7.59x10 <sup>-1</sup> | -0.138                                                              | 0.005                                                               |
| hsa-miR-181a-5p   | 9.80x10 <sup>-1</sup> | -0.029                                                              | 0.002                                                               |
| hsa-let-7b-5p     | 7.87x10 <sup>-1</sup> | 0.092                                                               | 0.001                                                               |
| hsa-miR-23b-3p    | 9.18x10 <sup>-1</sup> | 0.060                                                               | -0.003                                                              |
| hsa-miR-128-3p    | 9.42x10 <sup>-1</sup> | -0.030                                                              | -0.006                                                              |
| hsa-miR-106a-5p   | 6.63x10 <sup>-1</sup> | -0.088                                                              | -0.009                                                              |
| hsa-miR-126-5p    | 8.21x10 <sup>-1</sup> | 0.092                                                               | -0.013                                                              |
| hsa-miR-130b-3p   | 9.35x10 <sup>-1</sup> | 0.052                                                               | -0.013                                                              |
| hsa-miR-134-5p    | 9.41x10 <sup>-1</sup> | 0.128                                                               | -0.014                                                              |
| hsa-miR-18b-5p    | 9.85x10 <sup>-1</sup> | 0.015                                                               | -0.020                                                              |
| hsa-miR-421       | 9.11x10 <sup>-1</sup> | -0.018                                                              | -0.021                                                              |
| hsa-miR-377-3p    | 9.18x10 <sup>-1</sup> | 0.162                                                               | -0.024                                                              |
| hsa-let-7g-3p     | 7.63x10 <sup>-1</sup> | -0.148                                                              | -0.026                                                              |
| hsa-miR-450a-5p   | 4.07x10 <sup>-1</sup> | 0.310                                                               | -0.027                                                              |
| hsa-miR-17-5p     | 6.39x10 <sup>-1</sup> | -0.101                                                              | -0.028                                                              |
| hsa-miR-493-3p    | 7.24x10 <sup>-1</sup> | 0.285                                                               | -0.030                                                              |
| hsa-miR-106b-3p   | 4.77x10 <sup>-1</sup> | 0.137                                                               | -0.036                                                              |
| hsa-miR-142-5p    | 9.47x10 <sup>-1</sup> | 0.027                                                               | -0.037                                                              |
| hsa-miR-485-3p    | 9.72x10 <sup>-1</sup> | 0.114                                                               | -0.039                                                              |
| hsa-miR-196b-3p   | 6.61x10 <sup>-1</sup> | 0.280                                                               | -0.039                                                              |
| hsa-miR-150-3p    | 7.62x10 <sup>-1</sup> | -0.282                                                              | -0.041                                                              |
| hsa-miR-148a-5p   | 9.64x10 <sup>-1</sup> | 0.028                                                               | -0.044                                                              |
| hsa-miR-139-5p    | 9.11x10 <sup>-1</sup> | 0.090                                                               | -0.046                                                              |
| hsa-miR-126-3p    | 8.32x10 <sup>-1</sup> | 0.078                                                               | -0.047                                                              |
| hsa-miR-424-5p    | 6.80x10 <sup>-1</sup> | 0.207                                                               | -0.047                                                              |
| hsa-miR-493-5p    | 5.79x10 <sup>-1</sup> | 0.491                                                               | -0.050                                                              |
| hsa-miR-181a-2-3p | 8.89x10 <sup>-1</sup> | -0.016                                                              | -0.051                                                              |
| hsa-miR-337-5p    | 9.20x10 <sup>-1</sup> | -0.122                                                              | -0.052                                                              |
| hsa-miR-339-3p    | 9.16x10 <sup>-1</sup> | -0.076                                                              | -0.061                                                              |
| hsa-miR-23c       | 7.64x10 <sup>-1</sup> | 0.185                                                               | -0.063                                                              |
| hsa-miR-130a-3p   | 8.66x10 <sup>-1</sup> | -0.035                                                              | -0.064                                                              |
| hsa-miR-99b-3p    | 8.66x10 <sup>-1</sup> | 0.112                                                               | -0.065                                                              |
| hsa-miR-148b-3p   | 6.16x10 <sup>-1</sup> | 0.091                                                               | -0.067                                                              |
| hsa-miR-181b-5p   | 8.83x10 <sup>-1</sup> | -0.009                                                              | -0.070                                                              |
| hsa-miR-27a-3p    | 8.86x10 <sup>-1</sup> | -0.002                                                              | -0.071                                                              |
| hsa-miR-2355-5p   | 9.09x10 <sup>-1</sup> | 0.143                                                               | -0.071                                                              |
| hsa-miR-186-5p    | 2.18x10 <sup>-1</sup> | 0.075                                                               | -0.073                                                              |
| hsa-miR-23a-5p    | 9.02x10 <sup>-1</sup> | 0.076                                                               | -0.073                                                              |
| hsa-miR-381-3p    | 9.44x10 <sup>-1</sup> | 0.089                                                               | -0.074                                                              |
| hsa-miR-584-5p    | 5.14x10 <sup>-1</sup> | 0.319                                                               | -0.074                                                              |
| hsa-miR-429       | 7.68x10 <sup>-1</sup> | -0.252                                                              | -0.075                                                              |
| hsa-miR-34b-5p    | 7.87x10 <sup>-1</sup> | 0.343                                                               | -0.075                                                              |
| hsa-miR-301a-3p   | 8.78x10 <sup>-1</sup> | -0.005                                                              | -0.075                                                              |
| hsa-miR-15b-5p    | 5.32x10 <sup>-1</sup> | -0.003                                                              | -0.080                                                              |
| hsa-miR-154-5p    | 9.54x10 <sup>-1</sup> | 0.078                                                               | -0.081                                                              |
| hsa-miR-769-5p    | 8.40x10 <sup>-1</sup> | -0.008                                                              | -0.087                                                              |
| hsa-miR-1-3p      | 2.26x10 <sup>-1</sup> | 0.649                                                               | -0.089                                                              |
| hsa-miR-23a-3p    | 8.17x10 <sup>-1</sup> | 0.084                                                               | -0.090                                                              |
| hsa-miR-539-5p    | 4.61x10 <sup>-1</sup> | 0.432                                                               | -0.091                                                              |
| hsa-miR-324-5p    | 8.56x10 <sup>-1</sup> | 0.024                                                               | -0.091                                                              |
| hsa-miR-573       | 9.20x10 <sup>-1</sup> | 0.296                                                               | -0.092                                                              |
| hsa-miR-223-5p    | 5.22x10 <sup>-1</sup> | 0.182                                                               | -0.097                                                              |



Table SV. Continued.

| miRNA ID        | P-value               | Fold-change<br>in log <sub>2</sub> scale,<br>group 1 vs.<br>group 2 | Fold-change<br>in log <sub>2</sub> scale,<br>group 3 vs.<br>group 2 |
|-----------------|-----------------------|---------------------------------------------------------------------|---------------------------------------------------------------------|
| hsa-miR-30b-5p  | 7.20x10 <sup>-1</sup> | 0.148                                                               | -0.100                                                              |
| hsa-miR-146a-5p | 8.40x10 <sup>-1</sup> | -0.003                                                              | -0.105                                                              |
| hsa-miR-382-5p  | 8.93x10 <sup>-1</sup> | 0.177                                                               | -0.105                                                              |
| hsa-miR-338-3p  | 6.18x10 <sup>-1</sup> | 0.178                                                               | -0.106                                                              |
| hsa-miR-30d-3p  | 5.99x10 <sup>-1</sup> | 0.257                                                               | -0.108                                                              |
| hsa-miR-125a-3p | 8.09x10 <sup>-1</sup> | 0.061                                                               | -0.113                                                              |
| hsa-miR-340-5p  | 6.78x10 <sup>-1</sup> | 0.031                                                               | -0.115                                                              |
| hsa-let-7g-5p   | 6.54x10 <sup>-1</sup> | -0.044                                                              | -0.117                                                              |
| hsa-miR-425-3p  | 7.47x10 <sup>-1</sup> | -0.010                                                              | -0.121                                                              |
| hsa-miR-337-3p  | 8.84x10 <sup>-1</sup> | 0.141                                                               | -0.121                                                              |
| hsa-miR-590-5p  | 1.14x10 <sup>-1</sup> | -0.168                                                              | -0.124                                                              |
| hsa-miR-135a-5p | 7.45x10 <sup>-1</sup> | 0.099                                                               | -0.126                                                              |
| hsa-miR-369-5p  | 9.16x10 <sup>-1</sup> | 0.076                                                               | -0.129                                                              |
| hsa-miR-141-3p  | 1.69x10 <sup>-1</sup> | -0.698                                                              | -0.132                                                              |
| hsa-miR-28-3p   | 6.66x10 <sup>-1</sup> | 0.064                                                               | -0.133                                                              |
| hsa-miR-125a-5p | 7.53x10 <sup>-1</sup> | 0.001                                                               | -0.133                                                              |
| hsa-miR-485-5p  | 9.16x10 <sup>-1</sup> | 0.085                                                               | -0.136                                                              |
| hsa-miR-146b-5p | 7.61x10 <sup>-1</sup> | 0.033                                                               | -0.140                                                              |
| hsa-miR-432-5p  | 8.96x10 <sup>-1</sup> | 0.157                                                               | -0.144                                                              |
| hsa-miR-222-3p  | 2.55x10 <sup>-1</sup> | 0.118                                                               | -0.147                                                              |
| hsa-miR-151a-5p | 5.95x10 <sup>-1</sup> | 0.113                                                               | -0.147                                                              |
| hsa-miR-130b-5p | 5.87x10 <sup>-1</sup> | 0.181                                                               | -0.147                                                              |
| hsa-miR-151a-3p | 4.40x10 <sup>-1</sup> | 0.192                                                               | -0.150                                                              |
| hsa-miR-99b-5p  | 6.30x10 <sup>-1</sup> | 0.008                                                               | -0.151                                                              |
| hsa-miR-487b-3p | 8.66x10 <sup>-1</sup> | 0.170                                                               | -0.152                                                              |
| hsa-miR-652-3p  | 5.84x10 <sup>-1</sup> | 0.085                                                               | -0.156                                                              |
| hsa-miR-30e-3p  | 6.09x10 <sup>-1</sup> | 0.065                                                               | -0.157                                                              |
| hsa-miR-196b-5p | 3.66x10 <sup>-1</sup> | 0.087                                                               | -0.161                                                              |
| hsa-miR-598-3p  | 3.78x10 <sup>-1</sup> | 0.066                                                               | -0.161                                                              |
| hsa-miR-328-3p  | 7.88x10 <sup>-1</sup> | 0.094                                                               | -0.165                                                              |
| hsa-miR-18a-5p  | 4.64x10 <sup>-1</sup> | -0.050                                                              | -0.165                                                              |
| hsa-miR-671-3p  | 6.91x10 <sup>-1</sup> | 0.246                                                               | -0.166                                                              |
| hsa-miR-221-5p  | 4.64x10 <sup>-1</sup> | -0.029                                                              | -0.173                                                              |
| hsa-let-7a-5p   | 6.31x10 <sup>-1</sup> | 0.076                                                               | -0.178                                                              |
| hsa-miR-335-3p  | 2.64x10 <sup>-1</sup> | 0.498                                                               | -0.181                                                              |
| hsa-miR-495-3p  | 7.53x10 <sup>-1</sup> | 0.230                                                               | -0.181                                                              |
| hsa-miR-454-3p  | 4.07x10 <sup>-1</sup> | 0.231                                                               | -0.186                                                              |
| hsa-miR-211-5p  | 6.86x10 <sup>-1</sup> | 0.071                                                               | -0.188                                                              |
| hsa-miR-223-3p  | 4.78x10 <sup>-1</sup> | 0.142                                                               | -0.188                                                              |
| hsa-miR-107     | 3.75x10 <sup>-1</sup> | 0.200                                                               | -0.190                                                              |
| hsa-miR-136-5p  | 7.34x10 <sup>-1</sup> | 0.218                                                               | -0.191                                                              |
| hsa-miR-299-3p  | 7.63x10 <sup>-1</sup> | -0.077                                                              | -0.191                                                              |
| hsa-miR-127-3p  | 6.71x10 <sup>-1</sup> | 0.351                                                               | -0.192                                                              |
| hsa-miR-431-5p  | 8.45x10 <sup>-1</sup> | 0.138                                                               | -0.197                                                              |
| hsa-miR-503-5p  | 2.78x10 <sup>-1</sup> | 0.543                                                               | -0.199                                                              |
| hsa-miR-199b-3p | 5.69x10 <sup>-1</sup> | 0.189                                                               | -0.202                                                              |
| hsa-miR-133a-3p | 3.60x10 <sup>-1</sup> | 0.549                                                               | -0.205                                                              |
| hsa-miR-374b-5p | 5.01x10 <sup>-1</sup> | 0.113                                                               | -0.211                                                              |
| hsa-miR-191-5p  | 5.32x10 <sup>-1</sup> | 0.098                                                               | -0.212                                                              |
| hsa-miR-628-5p  | 4.93x10 <sup>-1</sup> | 0.197                                                               | -0.225                                                              |
| hsa-miR-411-5p  | 5.88x10 <sup>-1</sup> | 0.397                                                               | -0.225                                                              |
| hsa-miR-221-3p  | 2.71x10 <sup>-1</sup> | 0.092                                                               | -0.227                                                              |
| hsa-miR-374a-5p | 5.72x10 <sup>-1</sup> | 0.053                                                               | -0.234                                                              |

Table SV. Continued.

| miRNA ID        | P-value               | Fold-change<br>in log <sub>2</sub> scale,<br>group 1 vs.<br>group 2 | Fold-change<br>in log <sub>2</sub> scale,<br>group 3 vs.<br>group 2 |
|-----------------|-----------------------|---------------------------------------------------------------------|---------------------------------------------------------------------|
| hsa-miR-301b-3p | 6.57x10 <sup>-1</sup> | 0.141                                                               | -0.245                                                              |
| hsa-miR-133b    | 3.21x10 <sup>-1</sup> | 0.555                                                               | -0.246                                                              |
| hsa-miR-330-3p  | 6.09x10 <sup>-1</sup> | 0.225                                                               | -0.247                                                              |
| hsa-miR-28-5p   | 3.91x10 <sup>-1</sup> | 0.235                                                               | -0.257                                                              |
| hsa-miR-199a-5p | 6.08x10 <sup>-1</sup> | 0.235                                                               | -0.260                                                              |
| hsa-miR-597-5p  | 5.91x10 <sup>-1</sup> | 0.273                                                               | -0.262                                                              |
| hsa-miR-491-5p  | 3.96x10 <sup>-1</sup> | 0.253                                                               | -0.269                                                              |
| hsa-miR-224-5p  | 6.18x10 <sup>-1</sup> | 0.235                                                               | -0.271                                                              |
| hsa-let-7f-5p   | 4.51x10 <sup>-1</sup> | 0.075                                                               | -0.273                                                              |
| hsa-miR-33a-5p  | 5.77x10 <sup>-1</sup> | 0.016                                                               | -0.295                                                              |
| hsa-miR-625-5p  | 5.19x10 <sup>-1</sup> | 0.258                                                               | -0.300                                                              |
| hsa-miR-551b-3p | 3.07x10 <sup>-1</sup> | 0.025                                                               | -0.316                                                              |
| hsa-miR-200c-3p | 1.93x10 <sup>-1</sup> | -0.390                                                              | -0.333                                                              |
| hsa-miR-379-5p  | 4.09x10 <sup>-1</sup> | 0.499                                                               | -0.343                                                              |
| hsa-miR-376b-3p | 5.44x10 <sup>-1</sup> | 0.077                                                               | -0.343                                                              |
| hsa-miR-654-5p  | 5.51x10 <sup>-1</sup> | 0.182                                                               | -0.350                                                              |
| hsa-miR-374c-5p | 2.50x10 <sup>-1</sup> | 0.306                                                               | -0.355                                                              |
| hsa-miR-654-3p  | 6.10x10 <sup>-1</sup> | 0.122                                                               | -0.360                                                              |
| hsa-miR-181d-5p | 3.36x10 <sup>-1</sup> | 0.277                                                               | -0.391                                                              |
| hsa-miR-369-3p  | 4.43x10 <sup>-1</sup> | 0.235                                                               | -0.420                                                              |
| hsa-miR-1973    | 5.94x10 <sup>-1</sup> | 0.149                                                               | -0.434                                                              |
| hsa-miR-411-3p  | 1.07x10 <sup>-1</sup> | 1.038                                                               | -0.441                                                              |

## B, miRNA expression comparison of group 3 vs. groups 1-2

| miRNA ID        | P-value               | Fold-change in log <sub>2</sub> scale,<br>group 3 vs. group 1/2 |
|-----------------|-----------------------|-----------------------------------------------------------------|
| hsa-miR-4257    | 5.25x10 <sup>-2</sup> | 0.993                                                           |
| hsa-miR-193a-5p | 1.38x10 <sup>-2</sup> | 0.883                                                           |
| hsa-miR-365a-3p | 1.19x10 <sup>-2</sup> | 0.808                                                           |
| hsa-miR-193b-3p | 1.79x10 <sup>-2</sup> | 0.796                                                           |
| hsa-miR-216a-5p | 1.02x10 <sup>-1</sup> | 0.734                                                           |
| hsa-miR-1290    | 5.87x10 <sup>-2</sup> | 0.661                                                           |
| hsa-miR-99a-5p  | 2.38x10 <sup>-2</sup> | 0.660                                                           |
| hsa-miR-483-5p  | 1.18x10 <sup>-1</sup> | 0.643                                                           |
| hsa-miR-483-3p  | 8.84x10 <sup>-2</sup> | 0.643                                                           |
| hsa-miR-34a-3p  | 4.68x10 <sup>-2</sup> | 0.622                                                           |
| hsa-miR-192-5p  | 5.44x10 <sup>-2</sup> | 0.613                                                           |
| hsa-miR-1207-5p | 1.75x10 <sup>-1</sup> | 0.580                                                           |
| hsa-miR-650     | 2.60x10 <sup>-1</sup> | 0.518                                                           |
| hsa-miR-34a-5p  | 8.12x10 <sup>-2</sup> | 0.510                                                           |
| hsa-miR-214-3p  | 1.93x10 <sup>-1</sup> | 0.508                                                           |
| hsa-miR-125b-5p | 6.52x10 <sup>-2</sup> | 0.505                                                           |
| hsa-miR-215-5p  | 1.46x10 <sup>-1</sup> | 0.492                                                           |
| hsa-miR-1825    | 2.71x10 <sup>-1</sup> | 0.475                                                           |
| hsa-miR-1291    | 1.36x10 <sup>-1</sup> | 0.473                                                           |
| hsa-miR-365b-5p | 2.92x10 <sup>-1</sup> | 0.452                                                           |
| hsa-miR-34b-3p  | 2.68x10 <sup>-1</sup> | 0.445                                                           |
| hsa-miR-378a-3p | 1.94x10 <sup>-2</sup> | 0.444                                                           |
| hsa-miR-194-5p  | 1.79x10 <sup>-1</sup> | 0.439                                                           |
| hsa-miR-596     | 3.61x10 <sup>-1</sup> | 0.424                                                           |
| hsa-miR-10b-5p  | 2.23x10 <sup>-1</sup> | 0.419                                                           |



Table SV. Continued.

| miRNA ID          | P-value               | Fold-change in log <sub>2</sub> scale,<br>group 3 vs. group 1/2 |
|-------------------|-----------------------|-----------------------------------------------------------------|
| hsa-miR-620       | 3.16x10 <sup>-1</sup> | 0.409                                                           |
| hsa-miR-378a-5p   | 1.26x10 <sup>-2</sup> | 0.394                                                           |
| hsa-miR-1275      | 2.53x10 <sup>-1</sup> | 0.391                                                           |
| hsa-miR-609       | 3.94x10 <sup>-1</sup> | 0.384                                                           |
| hsa-miR-362-3p    | 7.94x10 <sup>-2</sup> | 0.377                                                           |
| hsa-miR-621       | 4.05x10 <sup>-1</sup> | 0.361                                                           |
| hsa-miR-95-3p     | 2.28x10 <sup>-1</sup> | 0.355                                                           |
| hsa-miR-144-3p    | 3.89x10 <sup>-1</sup> | 0.338                                                           |
| hsa-let-7b-3p     | 5.36x10 <sup>-2</sup> | 0.337                                                           |
| hsa-miR-205-5p    | 4.40x10 <sup>-1</sup> | 0.336                                                           |
| hsa-miR-20b-5p    | 1.38x10 <sup>-1</sup> | 0.333                                                           |
| hsa-miR-30a-5p    | 1.07x10 <sup>-1</sup> | 0.332                                                           |
| hsa-miR-616-3p    | 3.02x10 <sup>-1</sup> | 0.330                                                           |
| hsa-miR-1299      | 3.80x10 <sup>-1</sup> | 0.325                                                           |
| hsa-miR-143-3p    | 4.46x10 <sup>-2</sup> | 0.325                                                           |
| hsa-miR-486-5p    | 2.30x10 <sup>-1</sup> | 0.320                                                           |
| hsa-miR-451a      | 3.48x10 <sup>-1</sup> | 0.314                                                           |
| hsa-miR-148a-3p   | 2.67x10 <sup>-2</sup> | 0.312                                                           |
| hsa-miR-4732-3p   | 3.47x10 <sup>-1</sup> | 0.312                                                           |
| hsa-miR-145-5p    | 5.60x10 <sup>-2</sup> | 0.306                                                           |
| hsa-miR-616-5p    | 1.43x10 <sup>-1</sup> | 0.305                                                           |
| hsa-miR-29a-3p    | 6.63x10 <sup>-2</sup> | 0.298                                                           |
| hsa-miR-500a-3p   | 2.29x10 <sup>-2</sup> | 0.294                                                           |
| hsa-miR-660-5p    | 1.52x10 <sup>-1</sup> | 0.294                                                           |
| hsa-miR-206       | 5.48x10 <sup>-1</sup> | 0.292                                                           |
| hsa-miR-502-3p    | 9.95x10 <sup>-2</sup> | 0.282                                                           |
| hsa-miR-518b      | 5.96x10 <sup>-1</sup> | 0.271                                                           |
| hsa-miR-27a-5p    | 1.36x10 <sup>-1</sup> | 0.271                                                           |
| hsa-miR-375       | 5.47x10 <sup>-1</sup> | 0.265                                                           |
| hsa-miR-550a-5p   | 1.16x10 <sup>-1</sup> | 0.257                                                           |
| hsa-miR-505-3p    | 5.65x10 <sup>-2</sup> | 0.252                                                           |
| hsa-miR-720 (v18) | 4.01x10 <sup>-1</sup> | 0.250                                                           |
| hsa-miR-96-5p     | 5.24x10 <sup>-1</sup> | 0.249                                                           |
| hsa-miR-497-5p    | 1.41x10 <sup>-1</sup> | 0.245                                                           |
| hsa-miR-196a-5p   | 4.86x10 <sup>-1</sup> | 0.241                                                           |
| hsa-miR-455-5p    | 6.44x10 <sup>-1</sup> | 0.238                                                           |
| hsa-miR-200c-5p   | 6.39x10 <sup>-1</sup> | 0.224                                                           |
| hsa-let-7f-1-3p   | 4.41x10 <sup>-2</sup> | 0.209                                                           |
| hsa-miR-25-5p     | 3.92x10 <sup>-1</sup> | 0.207                                                           |
| hsa-miR-25-3p     | 3.23x10 <sup>-1</sup> | 0.206                                                           |
| hsa-miR-532-5p    | 1.75x10 <sup>-1</sup> | 0.204                                                           |
| hsa-miR-29c-3p    | 1.30x10 <sup>-1</sup> | 0.204                                                           |
| hsa-miR-22-3p     | 1.08x10 <sup>-1</sup> | 0.201                                                           |
| hsa-miR-101-5p    | 2.69x10 <sup>-1</sup> | 0.197                                                           |
| hsa-miR-363-3p    | 3.72x10 <sup>-1</sup> | 0.194                                                           |
| hsa-miR-92a-3p    | 2.35x10 <sup>-1</sup> | 0.193                                                           |
| hsa-miR-16-5p     | 3.74x10 <sup>-1</sup> | 0.190                                                           |
| hsa-miR-132-3p    | 1.90x10 <sup>-1</sup> | 0.181                                                           |
| hsa-let-7a-3p     | 2.64x10 <sup>-1</sup> | 0.179                                                           |
| hsa-miR-1285-3p   | 1.76x10 <sup>-1</sup> | 0.176                                                           |
| hsa-miR-331-5p    | 6.72x10 <sup>-2</sup> | 0.170                                                           |
| hsa-miR-874-3p    | 4.96x10 <sup>-1</sup> | 0.162                                                           |
| hsa-miR-195-5p    | 1.74x10 <sup>-1</sup> | 0.161                                                           |
| hsa-miR-19b-3p    | 1.89x10 <sup>-1</sup> | 0.160                                                           |

Table SV. Continued.

| miRNA ID           | P-value               | Fold-change in log <sub>2</sub> scale,<br>group 3 vs. group 1/2 |
|--------------------|-----------------------|-----------------------------------------------------------------|
| hsa-miR-92b-3p     | 1.97x10 <sup>-1</sup> | 0.155                                                           |
| hsa-miR-27b-3p     | 3.09x10 <sup>-1</sup> | 0.152                                                           |
| hsa-miR-29b-2-5p   | 1.81x10 <sup>-1</sup> | 0.150                                                           |
| hsa-miR-374a-3p    | 5.06x10 <sup>-1</sup> | 0.147                                                           |
| hsa-miR-576-5p     | 3.08x10 <sup>-1</sup> | 0.147                                                           |
| hsa-miR-101-3p     | 4.79x10 <sup>-1</sup> | 0.145                                                           |
| hsa-miR-423-5p     | 1.57x10 <sup>-1</sup> | 0.144                                                           |
| hsa-miR-199b-5p    | 4.47x10 <sup>-1</sup> | 0.143                                                           |
| hsa-miR-362-5p     | 3.94x10 <sup>-1</sup> | 0.142                                                           |
| hsa-miR-338-5p     | 3.16x10 <sup>-1</sup> | 0.140                                                           |
| hsa-miR-4306       | 2.99x10 <sup>-1</sup> | 0.140                                                           |
| hsa-miR-320b       | 2.72x10 <sup>-1</sup> | 0.138                                                           |
| hsa-miR-320e       | 3.85x10 <sup>-1</sup> | 0.133                                                           |
| hsa-miR-15a-5p     | 4.42x10 <sup>-1</sup> | 0.132                                                           |
| hsa-miR-532-3p     | 2.21x10 <sup>-1</sup> | 0.131                                                           |
| hsa-miR-579-3p     | 4.58x10 <sup>-1</sup> | 0.129                                                           |
| hsa-miR-29c-5p     | 8.33x10 <sup>-2</sup> | 0.122                                                           |
| hsa-let-7f-2-3p    | 5.36x10 <sup>-1</sup> | 0.121                                                           |
| hsa-miR-21-5p      | 3.65x10 <sup>-1</sup> | 0.119                                                           |
| hsa-miR-452-5p     | 5.84x10 <sup>-1</sup> | 0.119                                                           |
| hsa-miR-135b-5p    | 8.01x10 <sup>-1</sup> | 0.118                                                           |
| hsa-miR-183-5p     | 7.34x10 <sup>-1</sup> | 0.118                                                           |
| hsa-miR-629-3p     | 4.22x10 <sup>-1</sup> | 0.107                                                           |
| hsa-miR-29a-5p     | 5.17x10 <sup>-1</sup> | 0.105                                                           |
| hsa-miR-589-5p     | 3.20x10 <sup>-1</sup> | 0.102                                                           |
| hsa-miR-29b-3p     | 4.76x10 <sup>-1</sup> | 0.096                                                           |
| hsa-miR-19a-3p     | 4.56x10 <sup>-1</sup> | 0.095                                                           |
| hsa-miR-10a-3p     | 7.03x10 <sup>-1</sup> | 0.092                                                           |
| hsa-miR-21-3p      | 4.82x10 <sup>-1</sup> | 0.090                                                           |
| hsa-miR-342-5p     | 6.27x10 <sup>-1</sup> | 0.086                                                           |
| hsa-miR-15b-3p     | 5.74x10 <sup>-1</sup> | 0.084                                                           |
| hsa-miR-627-5p     | 5.69x10 <sup>-1</sup> | 0.081                                                           |
| hsa-miR-15a-3p     | 4.15x10 <sup>-1</sup> | 0.080                                                           |
| hsa-miR-136-3p     | 7.64x10 <sup>-1</sup> | 0.077                                                           |
| hsa-miR-24-3p      | 5.22x10 <sup>-1</sup> | 0.076                                                           |
| hsa-miR-140-3p     | 4.63x10 <sup>-1</sup> | 0.075                                                           |
| hsa-miR-152-3p     | 5.26x10 <sup>-1</sup> | 0.073                                                           |
| hsa-miR-361-5p     | 4.58x10 <sup>-1</sup> | 0.072                                                           |
| hsa-miR-501-5p     | 6.58x10 <sup>-1</sup> | 0.070                                                           |
| hsa-miR-770-5p     | 8.21x10 <sup>-1</sup> | 0.070                                                           |
| hsa-miR-185-5p     | 4.84x10 <sup>-1</sup> | 0.068                                                           |
| hsa-miR-320d       | 5.54x10 <sup>-1</sup> | 0.066                                                           |
| hsa-miR-219a-5p    | 5.31x10 <sup>-1</sup> | 0.065                                                           |
| hsa-miR-9-3p       | 7.27x10 <sup>-1</sup> | 0.063                                                           |
| hsa-miR-1271-5p    | 6.80x10 <sup>-1</sup> | 0.061                                                           |
| hsa-miR-197-3p     | 6.01x10 <sup>-1</sup> | 0.053                                                           |
| hsa-miR-493-5p     | 8.71x10 <sup>-1</sup> | 0.052                                                           |
| hsa-miR-302f       | 2.85x10 <sup>-1</sup> | 0.052                                                           |
| hsa-miR-1280 (v18) | 7.20x10 <sup>-1</sup> | 0.051                                                           |
| hsa-miR-103a-3p    | 5.75x10 <sup>-1</sup> | 0.049                                                           |
| hsa-miR-204-5p     | 7.97x10 <sup>-1</sup> | 0.049                                                           |
| hsa-miR-1-3p       | 8.57x10 <sup>-1</sup> | 0.047                                                           |
| hsa-miR-320a       | 7.02x10 <sup>-1</sup> | 0.046                                                           |
| hsa-miR-425-5p     | 5.43x10 <sup>-1</sup> | 0.046                                                           |

Table SV. Continued.

| miRNA ID          | P-value               | Fold-change in log <sub>2</sub> scale,<br>group 3 vs. group 1/2 |
|-------------------|-----------------------|-----------------------------------------------------------------|
| hsa-miR-320c      | 7.06x10 <sup>-1</sup> | 0.043                                                           |
| hsa-miR-450a-5p   | 8.13x10 <sup>-1</sup> | 0.038                                                           |
| hsa-miR-93-3p     | 6.41x10 <sup>-1</sup> | 0.037                                                           |
| hsa-miR-335-5p    | 8.02x10 <sup>-1</sup> | 0.030                                                           |
| hsa-miR-493-3p    | 9.05x10 <sup>-1</sup> | 0.029                                                           |
| hsa-miR-500a-5p   | 8.62x10 <sup>-1</sup> | 0.027                                                           |
| hsa-miR-629-5p    | 8.66x10 <sup>-1</sup> | 0.027                                                           |
| hsa-miR-454-5p    | 8.38x10 <sup>-1</sup> | 0.026                                                           |
| hsa-miR-10a-5p    | 8.94x10 <sup>-1</sup> | 0.024                                                           |
| hsa-let-7d-3p     | 8.35x10 <sup>-1</sup> | 0.023                                                           |
| hsa-miR-30c-5p    | 8.92x10 <sup>-1</sup> | 0.022                                                           |
| hsa-miR-484       | 8.49x10 <sup>-1</sup> | 0.021                                                           |
| hsa-let-7b-5p     | 8.30x10 <sup>-1</sup> | 0.020                                                           |
| hsa-miR-196b-3p   | 9.27x10 <sup>-1</sup> | 0.019                                                           |
| hsa-miR-324-3p    | 8.40x10 <sup>-1</sup> | 0.017                                                           |
| hsa-miR-651-5p    | 9.25x10 <sup>-1</sup> | 0.015                                                           |
| hsa-miR-134-5p    | 9.59x10 <sup>-1</sup> | 0.013                                                           |
| hsa-miR-20a-5p    | 9.14x10 <sup>-1</sup> | 0.012                                                           |
| hsa-miR-106b-5p   | 9.34x10 <sup>-1</sup> | 0.010                                                           |
| hsa-miR-30e-5p    | 8.83x10 <sup>-1</sup> | 0.010                                                           |
| hsa-miR-23b-3p    | 9.24x10 <sup>-1</sup> | 0.010                                                           |
| hsa-miR-377-3p    | 9.71x10 <sup>-1</sup> | 0.010                                                           |
| hsa-miR-126-5p    | 9.49x10 <sup>-1</sup> | 0.006                                                           |
| hsa-miR-345-5p    | 9.51x10 <sup>-1</sup> | 0.006                                                           |
| hsa-let-7i-5p     | 9.13x10 <sup>-1</sup> | 0.005                                                           |
| hsa-miR-18a-3p    | 9.75x10 <sup>-1</sup> | 0.003                                                           |
| hsa-miR-17-3p     | 9.82x10 <sup>-1</sup> | 0.003                                                           |
| hsa-miR-539-5p    | 9.98x10 <sup>-1</sup> | -0.001                                                          |
| hsa-miR-130b-3p   | 9.79x10 <sup>-1</sup> | -0.003                                                          |
| hsa-miR-34b-5p    | 9.93x10 <sup>-1</sup> | -0.003                                                          |
| hsa-miR-181a-5p   | 9.70x10 <sup>-1</sup> | -0.004                                                          |
| hsa-miR-424-5p    | 9.80x10 <sup>-1</sup> | -0.004                                                          |
| hsa-miR-106b-3p   | 9.21x10 <sup>-1</sup> | -0.008                                                          |
| hsa-miR-584-5p    | 9.67x10 <sup>-1</sup> | -0.008                                                          |
| hsa-miR-128-3p    | 8.58x10 <sup>-1</sup> | -0.012                                                          |
| hsa-miR-485-3p    | 9.64x10 <sup>-1</sup> | -0.015                                                          |
| hsa-miR-18b-5p    | 8.83x10 <sup>-1</sup> | -0.017                                                          |
| hsa-miR-32-5p     | 8.56x10 <sup>-1</sup> | -0.024                                                          |
| hsa-miR-23c       | 8.90x10 <sup>-1</sup> | -0.024                                                          |
| hsa-miR-421       | 6.98x10 <sup>-1</sup> | -0.025                                                          |
| hsa-miR-139-5p    | 8.61x10 <sup>-1</sup> | -0.027                                                          |
| hsa-miR-106a-5p   | 7.05x10 <sup>-1</sup> | -0.027                                                          |
| hsa-miR-126-3p    | 7.65x10 <sup>-1</sup> | -0.030                                                          |
| hsa-miR-573       | 9.51x10 <sup>-1</sup> | -0.031                                                          |
| hsa-miR-142-5p    | 7.74x10 <sup>-1</sup> | -0.032                                                          |
| hsa-miR-200b-3p   | 9.20x10 <sup>-1</sup> | -0.033                                                          |
| hsa-miR-148a-5p   | 8.08x10 <sup>-1</sup> | -0.038                                                          |
| hsa-miR-2355-5p   | 8.64x10 <sup>-1</sup> | -0.041                                                          |
| hsa-miR-99b-3p    | 7.96x10 <sup>-1</sup> | -0.042                                                          |
| hsa-let-7e-3p     | 7.99x10 <sup>-1</sup> | -0.046                                                          |
| hsa-miR-148b-3p   | 5.44x10 <sup>-1</sup> | -0.048                                                          |
| hsa-miR-17-5p     | 5.83x10 <sup>-1</sup> | -0.049                                                          |
| hsa-miR-181a-2-3p | 6.34x10 <sup>-1</sup> | -0.054                                                          |
| hsa-miR-30d-3p    | 7.65x10 <sup>-1</sup> | -0.054                                                          |
| hsa-miR-381-3p    | 8.19x10 <sup>-1</sup> | -0.055                                                          |

Table SV. Continued.

| miRNA ID        | P-value               | Fold-change in log <sub>2</sub> scale,<br>group 3 vs. group 1/2 |
|-----------------|-----------------------|-----------------------------------------------------------------|
| hsa-let-7g-3p   | 7.17x10 <sup>-1</sup> | -0.057                                                          |
| hsa-miR-23a-5p  | 7.36x10 <sup>-1</sup> | -0.057                                                          |
| hsa-miR-186-5p  | 1.92x10 <sup>-1</sup> | -0.057                                                          |
| hsa-miR-223-5p  | 6.25x10 <sup>-1</sup> | -0.059                                                          |
| hsa-miR-150-5p  | 8.53x10 <sup>-1</sup> | -0.060                                                          |
| hsa-miR-138-5p  | 7.21x10 <sup>-1</sup> | -0.063                                                          |
| hsa-miR-154-5p  | 8.11x10 <sup>-1</sup> | -0.064                                                          |
| hsa-miR-382-5p  | 8.13x10 <sup>-1</sup> | -0.069                                                          |
| hsa-miR-30b-5p  | 6.47x10 <sup>-1</sup> | -0.069                                                          |
| hsa-miR-338-3p  | 6.25x10 <sup>-1</sup> | -0.069                                                          |
| hsa-miR-130a-3p | 6.10x10 <sup>-1</sup> | -0.071                                                          |
| hsa-miR-27a-3p  | 6.23x10 <sup>-1</sup> | -0.072                                                          |
| hsa-miR-181b-5p | 6.18x10 <sup>-1</sup> | -0.072                                                          |
| hsa-miR-23a-3p  | 6.17x10 <sup>-1</sup> | -0.073                                                          |
| hsa-miR-301a-3p | 6.10x10 <sup>-1</sup> | -0.076                                                          |
| hsa-miR-339-3p  | 7.28x10 <sup>-1</sup> | -0.077                                                          |
| hsa-miR-335-3p  | 7.17x10 <sup>-1</sup> | -0.077                                                          |
| hsa-miR-337-5p  | 7.80x10 <sup>-1</sup> | -0.078                                                          |
| hsa-miR-15b-5p  | 2.60x10 <sup>-1</sup> | -0.081                                                          |
| hsa-miR-324-5p  | 5.84x10 <sup>-1</sup> | -0.086                                                          |
| hsa-miR-503-5p  | 7.17x10 <sup>-1</sup> | -0.086                                                          |
| hsa-miR-769-5p  | 5.55x10 <sup>-1</sup> | -0.089                                                          |
| hsa-miR-133a-3p | 7.37x10 <sup>-1</sup> | -0.090                                                          |
| hsa-miR-337-3p  | 7.32x10 <sup>-1</sup> | -0.091                                                          |
| hsa-miR-150-3p  | 7.33x10 <sup>-1</sup> | -0.100                                                          |
| hsa-miR-125a-3p | 5.47x10 <sup>-1</sup> | -0.100                                                          |
| hsa-miR-135a-5p | 5.17x10 <sup>-1</sup> | -0.105                                                          |
| hsa-miR-146a-5p | 5.54x10 <sup>-1</sup> | -0.105                                                          |
| hsa-miR-340-5p  | 3.86x10 <sup>-1</sup> | -0.108                                                          |
| hsa-miR-130b-5p | 4.92x10 <sup>-1</sup> | -0.110                                                          |
| hsa-miR-151a-3p | 4.08x10 <sup>-1</sup> | -0.110                                                          |
| hsa-miR-432-5p  | 7.35x10 <sup>-1</sup> | -0.111                                                          |
| hsa-miR-369-5p  | 7.03x10 <sup>-1</sup> | -0.114                                                          |
| hsa-miR-671-3p  | 6.26x10 <sup>-1</sup> | -0.115                                                          |
| hsa-miR-487b-3p | 7.03x10 <sup>-1</sup> | -0.116                                                          |
| hsa-miR-485-5p  | 7.05x10 <sup>-1</sup> | -0.118                                                          |
| hsa-miR-127-3p  | 6.89x10 <sup>-1</sup> | -0.119                                                          |
| hsa-miR-28-3p   | 3.96x10 <sup>-1</sup> | -0.119                                                          |
| hsa-miR-222-3p  | 1.68x10 <sup>-1</sup> | -0.122                                                          |
| hsa-miR-425-3p  | 4.45x10 <sup>-1</sup> | -0.123                                                          |
| hsa-miR-151a-5p | 3.86x10 <sup>-1</sup> | -0.123                                                          |
| hsa-let-7g-5p   | 3.69x10 <sup>-1</sup> | -0.126                                                          |
| hsa-miR-429     | 6.65x10 <sup>-1</sup> | -0.127                                                          |
| hsa-miR-133b    | 6.24x10 <sup>-1</sup> | -0.130                                                          |
| hsa-miR-125a-5p | 4.50x10 <sup>-1</sup> | -0.133                                                          |
| hsa-miR-146b-5p | 4.65x10 <sup>-1</sup> | -0.133                                                          |
| hsa-miR-495-3p  | 6.24x10 <sup>-1</sup> | -0.134                                                          |
| hsa-miR-454-3p  | 3.76x10 <sup>-1</sup> | -0.138                                                          |
| hsa-miR-652-3p  | 3.38x10 <sup>-1</sup> | -0.139                                                          |
| hsa-miR-411-5p  | 6.30x10 <sup>-1</sup> | -0.143                                                          |
| hsa-miR-196b-5p | 1.89x10 <sup>-1</sup> | -0.143                                                          |
| hsa-miR-30e-3p  | 3.40x10 <sup>-1</sup> | -0.143                                                          |
| hsa-miR-328-3p  | 5.27x10 <sup>-1</sup> | -0.145                                                          |
| hsa-miR-136-5p  | 5.81x10 <sup>-1</sup> | -0.145                                                          |
| hsa-miR-598-3p  | 1.81x10 <sup>-1</sup> | -0.148                                                          |

Table SV. Continued.

| miRNA ID        | P-value               | Fold-change in log <sub>2</sub> scale,<br>group 3 vs. group 1/2 |
|-----------------|-----------------------|-----------------------------------------------------------------|
| hsa-miR-107     | 3.03x10 <sup>-1</sup> | -0.148                                                          |
| hsa-miR-99b-5p  | 3.36x10 <sup>-1</sup> | -0.150                                                          |
| hsa-miR-223-3p  | 2.99x10 <sup>-1</sup> | -0.159                                                          |
| hsa-miR-590-5p  | 9.11x10 <sup>-2</sup> | -0.159                                                          |
| hsa-let-7a-5p   | 3.60x10 <sup>-1</sup> | -0.162                                                          |
| hsa-miR-199b-3p | 4.04x10 <sup>-1</sup> | -0.163                                                          |
| hsa-miR-431-5p  | 6.11x10 <sup>-1</sup> | -0.168                                                          |
| hsa-miR-211-5p  | 4.02x10 <sup>-1</sup> | -0.173                                                          |
| hsa-miR-18a-5p  | 2.22x10 <sup>-1</sup> | -0.175                                                          |
| hsa-miR-221-5p  | 2.17x10 <sup>-1</sup> | -0.180                                                          |
| hsa-miR-628-5p  | 3.36x10 <sup>-1</sup> | -0.184                                                          |
| hsa-miR-374b-5p | 2.76x10 <sup>-1</sup> | -0.187                                                          |
| hsa-miR-191-5p  | 2.88x10 <sup>-1</sup> | -0.192                                                          |
| hsa-miR-330-3p  | 4.28x10 <sup>-1</sup> | -0.200                                                          |
| hsa-miR-597-5p  | 4.46x10 <sup>-1</sup> | -0.205                                                          |
| hsa-miR-299-3p  | 4.75x10 <sup>-1</sup> | -0.207                                                          |
| hsa-miR-28-5p   | 2.77x10 <sup>-1</sup> | -0.208                                                          |
| hsa-miR-221-3p  | 1.21x10 <sup>-1</sup> | -0.208                                                          |
| hsa-miR-199a-5p | 4.25x10 <sup>-1</sup> | -0.212                                                          |
| hsa-miR-301b-3p | 4.01x10 <sup>-1</sup> | -0.215                                                          |
| hsa-miR-491-5p  | 2.86x10 <sup>-1</sup> | -0.216                                                          |
| hsa-miR-224-5p  | 4.24x10 <sup>-1</sup> | -0.222                                                          |
| hsa-miR-374a-5p | 2.96x10 <sup>-1</sup> | -0.223                                                          |
| hsa-miR-411-3p  | 5.25x10 <sup>-1</sup> | -0.224                                                          |
| hsa-miR-379-5p  | 4.41x10 <sup>-1</sup> | -0.239                                                          |
| hsa-miR-625-5p  | 3.51x10 <sup>-1</sup> | -0.246                                                          |
| hsa-let-7f-5p   | 2.15x10 <sup>-1</sup> | -0.257                                                          |
| hsa-miR-141-3p  | 3.43x10 <sup>-1</sup> | -0.278                                                          |
| hsa-miR-374c-5p | 1.75x10 <sup>-1</sup> | -0.292                                                          |
| hsa-miR-33a-5p  | 2.94x10 <sup>-1</sup> | -0.292                                                          |
| hsa-miR-551b-3p | 1.24x10 <sup>-1</sup> | -0.310                                                          |
| hsa-miR-654-5p  | 3.09x10 <sup>-1</sup> | -0.312                                                          |
| hsa-miR-376b-3p | 2.75x10 <sup>-1</sup> | -0.327                                                          |
| hsa-miR-181d-5p | 1.98x10 <sup>-1</sup> | -0.334                                                          |
| hsa-miR-654-3p  | 3.33x10 <sup>-1</sup> | -0.335                                                          |
| hsa-miR-369-3p  | 2.41x10 <sup>-1</sup> | -0.371                                                          |
| hsa-miR-1973    | 3.21x10 <sup>-1</sup> | -0.403                                                          |
| hsa-miR-200c-3p | 1.27x10 <sup>-1</sup> | -0.414                                                          |

Table SVI. miRNA expression comparison of pancreatic ductal adenocarcinoma patients (PDAC) vs. chronic pancreatitis patients (CP) and control group (CG) showing the prognostic value.

| miRNA ID          | P-value               | Fold-change in log <sub>2</sub> scale<br>(Poor prognosis VS<br>good prognosis) |
|-------------------|-----------------------|--------------------------------------------------------------------------------|
| hsa-miR-216a-5p   | 2.04x10 <sup>-2</sup> | 1.0419                                                                         |
| hsa-miR-200c-5p   | 2.94x10 <sup>-2</sup> | 1.0408                                                                         |
| hsa-miR-375       | 1.88x10 <sup>-2</sup> | 1.0308                                                                         |
| hsa-miR-483-5p    | 1.45x10 <sup>-2</sup> | 1.0020                                                                         |
| hsa-miR-365a-3p   | 1.76x10 <sup>-3</sup> | 0.9843                                                                         |
| hsa-miR-193a-5p   | 6.31x10 <sup>-3</sup> | 0.9671                                                                         |
| hsa-miR-193b-3p   | 3.96x10 <sup>-3</sup> | 0.9410                                                                         |
| hsa-miR-205-5p    | 2.83x10 <sup>-2</sup> | 0.9404                                                                         |
| hsa-miR-650       | 4.69x10 <sup>-2</sup> | 0.9049                                                                         |
| hsa-miR-99a-5p    | 2.07x10 <sup>-3</sup> | 0.8891                                                                         |
| hsa-miR-609       | 4.63x10 <sup>-2</sup> | 0.8823                                                                         |
| hsa-miR-483-3p    | 1.79x10 <sup>-2</sup> | 0.8797                                                                         |
| hsa-miR-1290      | 1.28x10 <sup>-2</sup> | 0.8591                                                                         |
| hsa-miR-4257      | 9.59x10 <sup>-2</sup> | 0.8588                                                                         |
| hsa-miR-10b-5p    | 1.61x10 <sup>-2</sup> | 0.8120                                                                         |
| hsa-miR-214-3p    | 3.71x10 <sup>-2</sup> | 0.8108                                                                         |
| hsa-miR-192-5p    | 1.19x10 <sup>-2</sup> | 0.7868                                                                         |
| hsa-miR-215-5p    | 2.17x10 <sup>-2</sup> | 0.7732                                                                         |
| hsa-miR-1291      | 1.45x10 <sup>-2</sup> | 0.7549                                                                         |
| hsa-miR-621       | 8.15x10 <sup>-2</sup> | 0.7401                                                                         |
| hsa-miR-573       | 1.47x10 <sup>-1</sup> | 0.7171                                                                         |
| hsa-miR-34b-3p    | 7.18x10 <sup>-2</sup> | 0.7152                                                                         |
| hsa-miR-194-5p    | 2.87x10 <sup>-2</sup> | 0.7120                                                                         |
| hsa-miR-125b-5p   | 1.17x10 <sup>-2</sup> | 0.6855                                                                         |
| hsa-miR-596       | 1.37x10 <sup>-1</sup> | 0.6816                                                                         |
| hsa-miR-620       | 1.01x10 <sup>-1</sup> | 0.6618                                                                         |
| hsa-miR-365b-5p   | 1.40x10 <sup>-1</sup> | 0.6301                                                                         |
| hsa-miR-1825      | 1.48x10 <sup>-1</sup> | 0.6181                                                                         |
| hsa-miR-1207-5p   | 1.70x10 <sup>-1</sup> | 0.5802                                                                         |
| hsa-miR-34a-3p    | 7.00x10 <sup>-2</sup> | 0.5496                                                                         |
| hsa-miR-10a-3p    | 2.60x10 <sup>-2</sup> | 0.5369                                                                         |
| hsa-miR-616-5p    | 1.01x10 <sup>-2</sup> | 0.5342                                                                         |
| hsa-miR-34a-5p    | 7.03x10 <sup>-2</sup> | 0.5250                                                                         |
| hsa-miR-196a-5p   | 1.44x10 <sup>-1</sup> | 0.5023                                                                         |
| hsa-miR-455-5p    | 3.44x10 <sup>-1</sup> | 0.4951                                                                         |
| hsa-miR-720 (v18) | 9.61x10 <sup>-2</sup> | 0.4864                                                                         |
| hsa-miR-34b-5p    | 1.46x10 <sup>-1</sup> | 0.4852                                                                         |
| hsa-miR-30a-5p    | 1.78x10 <sup>-2</sup> | 0.4809                                                                         |
| hsa-miR-378a-5p   | 3.04x10 <sup>-3</sup> | 0.4631                                                                         |
| hsa-miR-96-5p     | 2.46x10 <sup>-1</sup> | 0.4584                                                                         |
| hsa-let-7b-3p     | 1.03x10 <sup>-2</sup> | 0.4419                                                                         |
| hsa-miR-148a-3p   | 1.72x10 <sup>-3</sup> | 0.4404                                                                         |
| hsa-miR-1275      | 2.06x10 <sup>-1</sup> | 0.4327                                                                         |
| hsa-miR-616-3p    | 1.73x10 <sup>-1</sup> | 0.4317                                                                         |
| hsa-miR-505-3p    | 6.46x10 <sup>-4</sup> | 0.4247                                                                         |
| hsa-miR-378a-3p   | 2.57x10 <sup>-2</sup> | 0.4197                                                                         |
| hsa-miR-320e      | 7.38x10 <sup>-3</sup> | 0.4069                                                                         |
| hsa-miR-145-5p    | 8.97x10 <sup>-3</sup> | 0.4058                                                                         |
| hsa-miR-196b-3p   | 5.62x10 <sup>-2</sup> | 0.3989                                                                         |
| hsa-miR-497-5p    | 1.98x10 <sup>-2</sup> | 0.3880                                                                         |
| hsa-miR-10a-5p    | 3.15x10 <sup>-2</sup> | 0.3806                                                                         |

Table SVI. Continued.

| miRNA ID         | P-value               | Fold-change in log <sub>2</sub> scale<br>(Poor prognosis VS<br>good prognosis) |
|------------------|-----------------------|--------------------------------------------------------------------------------|
| hsa-miR-95-3p    | 2.08x10 <sup>-1</sup> | 0.3736                                                                         |
| hsa-miR-22-3p    | 2.30x10 <sup>-3</sup> | 0.3733                                                                         |
| hsa-miR-4732-3p  | 2.70x10 <sup>-1</sup> | 0.3643                                                                         |
| hsa-miR-132-3p   | 7.71x10 <sup>-3</sup> | 0.3585                                                                         |
| hsa-miR-362-3p   | 1.04x10 <sup>-1</sup> | 0.3449                                                                         |
| hsa-miR-770-5p   | 2.59x10 <sup>-1</sup> | 0.3385                                                                         |
| hsa-miR-29a-3p   | 3.63x10 <sup>-2</sup> | 0.3359                                                                         |
| hsa-miR-206      | 5.01x10 <sup>-1</sup> | 0.3320                                                                         |
| hsa-miR-320d     | 4.01x10 <sup>-3</sup> | 0.3229                                                                         |
| hsa-miR-874-3p   | 1.67x10 <sup>-1</sup> | 0.3228                                                                         |
| hsa-miR-452-5p   | 1.39x10 <sup>-1</sup> | 0.3206                                                                         |
| hsa-miR-500a-3p  | 1.09x10 <sup>-2</sup> | 0.3203                                                                         |
| hsa-miR-9-3p     | 6.19x10 <sup>-2</sup> | 0.3200                                                                         |
| hsa-miR-320b     | 1.87x10 <sup>-2</sup> | 0.2971                                                                         |
| hsa-miR-660-5p   | 1.49x10 <sup>-1</sup> | 0.2949                                                                         |
| hsa-miR-651-5p   | 6.38x10 <sup>-2</sup> | 0.2874                                                                         |
| hsa-miR-502-3p   | 9.64x10 <sup>-2</sup> | 0.2789                                                                         |
| hsa-miR-183-5p   | 4.39x10 <sup>-1</sup> | 0.2702                                                                         |
| hsa-miR-101-5p   | 1.25x10 <sup>-1</sup> | 0.2688                                                                         |
| hsa-miR-501-5p   | 8.18x10 <sup>-2</sup> | 0.2646                                                                         |
| hsa-miR-532-3p   | 1.23x10 <sup>-2</sup> | 0.2600                                                                         |
| hsa-let-7f-1-3p  | 1.25x10 <sup>-2</sup> | 0.2576                                                                         |
| hsa-miR-1299     | 4.98x10 <sup>-1</sup> | 0.2566                                                                         |
| hsa-miR-629-3p   | 4.64x10 <sup>-2</sup> | 0.2559                                                                         |
| hsa-miR-144-3p   | 5.13x10 <sup>-1</sup> | 0.2554                                                                         |
| hsa-let-7a-3p    | 1.11x10 <sup>-1</sup> | 0.2521                                                                         |
| hsa-miR-148a-5p  | 1.31x10 <sup>-1</sup> | 0.2406                                                                         |
| hsa-miR-92b-3p   | 5.41x10 <sup>-2</sup> | 0.2316                                                                         |
| hsa-let-7g-3p    | 1.35x10 <sup>-1</sup> | 0.2299                                                                         |
| hsa-miR-200b-3p  | 4.98x10 <sup>-1</sup> | 0.2295                                                                         |
| hsa-miR-20b-5p   | 3.14x10 <sup>-1</sup> | 0.2266                                                                         |
| hsa-miR-429      | 4.62x10 <sup>-1</sup> | 0.2222                                                                         |
| hsa-miR-486-5p   | 4.17x10 <sup>-1</sup> | 0.2163                                                                         |
| hsa-miR-25-3p    | 3.01x10 <sup>-1</sup> | 0.2150                                                                         |
| hsa-miR-320c     | 6.34x10 <sup>-2</sup> | 0.2138                                                                         |
| hsa-miR-362-5p   | 2.14x10 <sup>-1</sup> | 0.2104                                                                         |
| hsa-miR-518b     | 6.81x10 <sup>-1</sup> | 0.2082                                                                         |
| hsa-miR-451a     | 5.36x10 <sup>-1</sup> | 0.2066                                                                         |
| hsa-miR-27a-5p   | 2.63x10 <sup>-1</sup> | 0.2050                                                                         |
| hsa-miR-500a-5p  | 2.08x10 <sup>-1</sup> | 0.1989                                                                         |
| hsa-miR-21-5p    | 1.18x10 <sup>-1</sup> | 0.1978                                                                         |
| hsa-miR-338-5p   | 1.70x10 <sup>-1</sup> | 0.1903                                                                         |
| hsa-miR-361-5p   | 4.38x10 <sup>-2</sup> | 0.1893                                                                         |
| hsa-miR-1285-3p  | 1.53x10 <sup>-1</sup> | 0.1882                                                                         |
| hsa-miR-627-5p   | 1.90x10 <sup>-1</sup> | 0.1862                                                                         |
| hsa-miR-320a     | 1.32x10 <sup>-1</sup> | 0.1837                                                                         |
| hsa-miR-27b-3p   | 2.17x10 <sup>-1</sup> | 0.1836                                                                         |
| hsa-miR-576-5p   | 2.04x10 <sup>-1</sup> | 0.1822                                                                         |
| hsa-miR-150-3p   | 5.44x10 <sup>-1</sup> | 0.1804                                                                         |
| hsa-miR-423-5p   | 8.05x10 <sup>-2</sup> | 0.1789                                                                         |
| hsa-miR-92a-3p   | 2.91x10 <sup>-1</sup> | 0.1729                                                                         |
| hsa-miR-363-3p   | 4.32x10 <sup>-1</sup> | 0.1705                                                                         |
| hsa-miR-152-3p   | 1.35x10 <sup>-1</sup> | 0.1697                                                                         |
| hsa-miR-29b-2-5p | 1.25x10 <sup>-1</sup> | 0.1677                                                                         |

Table SVI. Continued.

| miRNA ID           | P-value               | Fold-change in log <sub>2</sub> scale<br>(Poor prognosis VS<br>good prognosis) |
|--------------------|-----------------------|--------------------------------------------------------------------------------|
| hsa-miR-532-5p     | 2.76x10 <sup>-1</sup> | 0.1607                                                                         |
| hsa-miR-25-5p      | 5.05x10 <sup>-1</sup> | 0.1594                                                                         |
| hsa-miR-139-5p     | 3.16x10 <sup>-1</sup> | 0.1587                                                                         |
| hsa-miR-629-5p     | 3.19x10 <sup>-1</sup> | 0.1578                                                                         |
| hsa-miR-16-5p      | 4.68x10 <sup>-1</sup> | 0.1555                                                                         |
| hsa-miR-450a-5p    | 3.44x10 <sup>-1</sup> | 0.1539                                                                         |
| hsa-miR-143-3p     | 3.45x10 <sup>-1</sup> | 0.1508                                                                         |
| hsa-miR-30c-5p     | 3.72x10 <sup>-1</sup> | 0.1480                                                                         |
| hsa-miR-345-5p     | 1.26x10 <sup>-1</sup> | 0.1468                                                                         |
| hsa-miR-589-5p     | 1.54x10 <sup>-1</sup> | 0.1444                                                                         |
| hsa-let-7a-5p      | 4.21x10 <sup>-1</sup> | 0.1430                                                                         |
| hsa-miR-130b-3p    | 1.44x10 <sup>-1</sup> | 0.1392                                                                         |
| hsa-miR-23b-3p     | 1.71x10 <sup>-1</sup> | 0.1372                                                                         |
| hsa-miR-331-5p     | 1.56x10 <sup>-1</sup> | 0.1322                                                                         |
| hsa-miR-195-5p     | 2.85x10 <sup>-1</sup> | 0.1234                                                                         |
| hsa-miR-125a-3p    | 4.74x10 <sup>-1</sup> | 0.1195                                                                         |
| hsa-miR-1271-5p    | 4.34x10 <sup>-1</sup> | 0.1158                                                                         |
| hsa-miR-141-3p     | 7.04x10 <sup>-1</sup> | 0.1143                                                                         |
| hsa-miR-15a-5p     | 5.16x10 <sup>-1</sup> | 0.1120                                                                         |
| hsa-miR-21-3p      | 3.68x10 <sup>-1</sup> | 0.1119                                                                         |
| hsa-miR-550a-5p    | 4.95x10 <sup>-1</sup> | 0.1107                                                                         |
| hsa-miR-197-3p     | 2.78x10 <sup>-1</sup> | 0.1083                                                                         |
| hsa-miR-136-3p     | 6.93x10 <sup>-1</sup> | 0.1008                                                                         |
| hsa-miR-199b-5p    | 5.93x10 <sup>-1</sup> | 0.1004                                                                         |
| hsa-miR-1280 (v18) | 5.04x10 <sup>-1</sup> | 0.0958                                                                         |
| hsa-miR-219a-5p    | 3.87x10 <sup>-1</sup> | 0.0922                                                                         |
| hsa-miR-29c-3p     | 5.01x10 <sup>-1</sup> | 0.0910                                                                         |
| hsa-miR-181a-5p    | 3.54x10 <sup>-1</sup> | 0.0907                                                                         |
| hsa-miR-101-3p     | 6.65x10 <sup>-1</sup> | 0.0882                                                                         |
| hsa-miR-24-3p      | 4.74x10 <sup>-1</sup> | 0.0856                                                                         |
| hsa-miR-211-5p     | 6.80x10 <sup>-1</sup> | 0.0851                                                                         |
| hsa-let-7e-3p      | 6.46x10 <sup>-1</sup> | 0.0849                                                                         |
| hsa-miR-23c        | 6.39x10 <sup>-1</sup> | 0.0803                                                                         |
| hsa-miR-15a-3p     | 4.20x10 <sup>-1</sup> | 0.0786                                                                         |
| hsa-miR-4306       | 5.67x10 <sup>-1</sup> | 0.0768                                                                         |
| hsa-let-7b-5p      | 4.20x10 <sup>-1</sup> | 0.0744                                                                         |
| hsa-miR-93-3p      | 3.56x10 <sup>-1</sup> | 0.0717                                                                         |
| hsa-miR-493-3p     | 7.79x10 <sup>-1</sup> | 0.0679                                                                         |
| hsa-miR-342-5p     | 7.16x10 <sup>-1</sup> | 0.0665                                                                         |
| hsa-miR-15b-3p     | 6.55x10 <sup>-1</sup> | 0.0665                                                                         |
| hsa-miR-223-5p     | 6.07x10 <sup>-1</sup> | 0.0600                                                                         |
| hsa-miR-338-3p     | 6.82x10 <sup>-1</sup> | 0.0588                                                                         |
| hsa-miR-29c-5p     | 4.31x10 <sup>-1</sup> | 0.0566                                                                         |
| hsa-miR-30d-3p     | 7.61x10 <sup>-1</sup> | 0.0552                                                                         |
| hsa-miR-99b-3p     | 7.60x10 <sup>-1</sup> | 0.0492                                                                         |
| hsa-let-7i-5p      | 3.12x10 <sup>-1</sup> | 0.0484                                                                         |
| hsa-miR-302f       | 3.20x10 <sup>-1</sup> | 0.0484                                                                         |
| hsa-miR-106b-5p    | 7.26x10 <sup>-1</sup> | 0.0429                                                                         |
| hsa-miR-493-5p     | 9.01x10 <sup>-1</sup> | 0.0407                                                                         |
| hsa-miR-135b-5p    | 9.33x10 <sup>-1</sup> | 0.0396                                                                         |
| hsa-miR-454-3p     | 8.07x10 <sup>-1</sup> | 0.0390                                                                         |
| hsa-miR-374a-3p    | 8.72x10 <sup>-1</sup> | 0.0363                                                                         |
| hsa-miR-19a-3p     | 7.91x10 <sup>-1</sup> | 0.0333                                                                         |
| hsa-miR-99b-5p     | 8.39x10 <sup>-1</sup> | 0.0321                                                                         |

Table SVI. Continued.

| miRNA ID          | P-value               | Fold-change in log <sub>2</sub> scale<br>(Poor prognosis VS<br>good prognosis) |
|-------------------|-----------------------|--------------------------------------------------------------------------------|
| hsa-miR-424-5p    | 8.56x10 <sup>-1</sup> | 0.0294                                                                         |
| hsa-let-7d-3p     | 8.23x10 <sup>-1</sup> | 0.0256                                                                         |
| hsa-miR-135a-5p   | 8.77x10 <sup>-1</sup> | 0.0251                                                                         |
| hsa-miR-17-5p     | 8.35x10 <sup>-1</sup> | 0.0180                                                                         |
| hsa-miR-106b-3p   | 8.20x10 <sup>-1</sup> | 0.0180                                                                         |
| hsa-miR-30b-5p    | 9.19x10 <sup>-1</sup> | 0.0156                                                                         |
| hsa-miR-425-5p    | 8.64x10 <sup>-1</sup> | 0.0131                                                                         |
| hsa-miR-32-5p     | 9.25x10 <sup>-1</sup> | 0.0123                                                                         |
| hsa-miR-185-5p    | 9.17x10 <sup>-1</sup> | 0.0099                                                                         |
| hsa-miR-30e-5p    | 9.13x10 <sup>-1</sup> | 0.0075                                                                         |
| hsa-miR-126-3p    | 9.70x10 <sup>-1</sup> | 0.0038                                                                         |
| hsa-let-7g-5p     | 9.90x10 <sup>-1</sup> | 0.0018                                                                         |
| hsa-miR-19b-3p    | 9.86x10 <sup>-1</sup> | -0.0021                                                                        |
| hsa-miR-20a-5p    | 9.62x10 <sup>-1</sup> | -0.0051                                                                        |
| hsa-miR-150-5p    | 9.79x10 <sup>-1</sup> | -0.0087                                                                        |
| hsa-miR-18a-3p    | 9.28x10 <sup>-1</sup> | -0.0101                                                                        |
| hsa-miR-381-3p    | 9.59x10 <sup>-1</sup> | -0.0124                                                                        |
| hsa-miR-106a-5p   | 8.45x10 <sup>-1</sup> | -0.0141                                                                        |
| hsa-miR-140-3p    | 8.83x10 <sup>-1</sup> | -0.0150                                                                        |
| hsa-miR-421       | 7.72x10 <sup>-1</sup> | -0.0188                                                                        |
| hsa-miR-18b-5p    | 8.52x10 <sup>-1</sup> | -0.0209                                                                        |
| hsa-miR-103a-3p   | 8.11x10 <sup>-1</sup> | -0.0213                                                                        |
| hsa-miR-125a-5p   | 8.99x10 <sup>-1</sup> | -0.0229                                                                        |
| hsa-miR-222-3p    | 7.73x10 <sup>-1</sup> | -0.0255                                                                        |
| hsa-miR-130a-3p   | 8.33x10 <sup>-1</sup> | -0.0288                                                                        |
| hsa-miR-29b-3p    | 8.17x10 <sup>-1</sup> | -0.0312                                                                        |
| hsa-miR-204-5p    | 8.69x10 <sup>-1</sup> | -0.0314                                                                        |
| hsa-let-7f-2-3p   | 8.57x10 <sup>-1</sup> | -0.0362                                                                        |
| hsa-miR-221-3p    | 7.82x10 <sup>-1</sup> | -0.0369                                                                        |
| hsa-miR-128-3p    | 5.84x10 <sup>-1</sup> | -0.0383                                                                        |
| hsa-miR-224-5p    | 8.91x10 <sup>-1</sup> | -0.0394                                                                        |
| hsa-miR-15b-5p    | 5.90x10 <sup>-1</sup> | -0.0398                                                                        |
| hsa-miR-590-5p    | 6.71x10 <sup>-1</sup> | -0.0410                                                                        |
| hsa-miR-324-3p    | 6.10x10 <sup>-1</sup> | -0.0418                                                                        |
| hsa-miR-29a-5p    | 7.86x10 <sup>-1</sup> | -0.0432                                                                        |
| hsa-miR-337-5p    | 8.73x10 <sup>-1</sup> | -0.0449                                                                        |
| hsa-miR-27a-3p    | 7.19x10 <sup>-1</sup> | -0.0528                                                                        |
| hsa-miR-196b-5p   | 6.23x10 <sup>-1</sup> | -0.0544                                                                        |
| hsa-miR-335-5p    | 6.40x10 <sup>-1</sup> | -0.0545                                                                        |
| hsa-miR-148b-3p   | 4.47x10 <sup>-1</sup> | -0.0614                                                                        |
| hsa-miR-181b-5p   | 6.62x10 <sup>-1</sup> | -0.0647                                                                        |
| hsa-miR-146b-5p   | 7.10x10 <sup>-1</sup> | -0.0669                                                                        |
| hsa-miR-28-3p     | 6.31x10 <sup>-1</sup> | -0.0673                                                                        |
| hsa-let-7f-5p     | 7.47x10 <sup>-1</sup> | -0.0685                                                                        |
| hsa-miR-181a-2-3p | 5.19x10 <sup>-1</sup> | -0.0730                                                                        |
| hsa-miR-30e-3p    | 6.22x10 <sup>-1</sup> | -0.0741                                                                        |
| hsa-miR-584-5p    | 6.50x10 <sup>-1</sup> | -0.0818                                                                        |
| hsa-miR-130b-5p   | 5.88x10 <sup>-1</sup> | -0.0854                                                                        |
| hsa-miR-126-5p    | 3.85x10 <sup>-1</sup> | -0.0855                                                                        |
| hsa-miR-23a-3p    | 5.31x10 <sup>-1</sup> | -0.0896                                                                        |
| hsa-miR-301a-3p   | 5.49x10 <sup>-1</sup> | -0.0904                                                                        |
| hsa-miR-186-5p    | 2.37x10 <sup>-2</sup> | -0.0967                                                                        |
| hsa-miR-377-3p    | 7.11x10 <sup>-1</sup> | -0.0984                                                                        |
| hsa-miR-107       | 4.55x10 <sup>-1</sup> | -0.1067                                                                        |



Table SVI. Continued.

| miRNA ID        | P-value               | Fold-change in log <sub>2</sub> scale<br>(Poor prognosis VS<br>good prognosis) |
|-----------------|-----------------------|--------------------------------------------------------------------------------|
| hsa-miR-340-5p  | 3.80x10 <sup>-1</sup> | -0.1074                                                                        |
| hsa-miR-146a-5p | 5.33x10 <sup>-1</sup> | -0.1096                                                                        |
| hsa-miR-454-5p  | 3.71x10 <sup>-1</sup> | -0.1129                                                                        |
| hsa-miR-374a-5p | 5.93x10 <sup>-1</sup> | -0.1175                                                                        |
| hsa-miR-142-5p  | 2.89x10 <sup>-1</sup> | -0.1200                                                                        |
| hsa-miR-579-3p  | 4.68x10 <sup>-1</sup> | -0.1207                                                                        |
| hsa-miR-503-5p  | 6.00x10 <sup>-1</sup> | -0.1232                                                                        |
| hsa-miR-134-5p  | 6.28x10 <sup>-1</sup> | -0.1233                                                                        |
| hsa-miR-223-3p  | 4.00x10 <sup>-1</sup> | -0.1291                                                                        |
| hsa-miR-17-3p   | 2.74x10 <sup>-1</sup> | -0.1319                                                                        |
| hsa-miR-652-3p  | 3.40x10 <sup>-1</sup> | -0.1358                                                                        |
| hsa-miR-539-5p  | 5.59x10 <sup>-1</sup> | -0.1386                                                                        |
| hsa-miR-127-3p  | 6.39x10 <sup>-1</sup> | -0.1403                                                                        |
| hsa-miR-151a-3p | 2.68x10 <sup>-1</sup> | -0.1459                                                                        |
| hsa-miR-484     | 1.93x10 <sup>-1</sup> | -0.1471                                                                        |
| hsa-miR-551b-3p | 4.69x10 <sup>-1</sup> | -0.1478                                                                        |
| hsa-miR-598-3p  | 1.65x10 <sup>-1</sup> | -0.1545                                                                        |
| hsa-miR-138-5p  | 3.69x10 <sup>-1</sup> | -0.1570                                                                        |
| hsa-miR-154-5p  | 5.51x10 <sup>-1</sup> | -0.1617                                                                        |
| hsa-miR-324-5p  | 2.98x10 <sup>-1</sup> | -0.1625                                                                        |
| hsa-miR-23a-5p  | 3.31x10 <sup>-1</sup> | -0.1627                                                                        |
| hsa-miR-597-5p  | 4.80x10 <sup>-1</sup> | -0.1634                                                                        |
| hsa-miR-769-5p  | 2.65x10 <sup>-1</sup> | -0.1693                                                                        |
| hsa-miR-191-5p  | 3.38x10 <sup>-1</sup> | -0.1703                                                                        |
| hsa-miR-411-3p  | 5.55x10 <sup>-1</sup> | -0.1769                                                                        |
| hsa-miR-654-5p  | 5.60x10 <sup>-1</sup> | -0.1806                                                                        |
| hsa-miR-18a-5p  | 1.80x10 <sup>-1</sup> | -0.1917                                                                        |
| hsa-miR-2355-5p | 3.95x10 <sup>-1</sup> | -0.2091                                                                        |
| hsa-miR-382-5p  | 4.68x10 <sup>-1</sup> | -0.2101                                                                        |
| hsa-miR-411-5p  | 4.74x10 <sup>-1</sup> | -0.2108                                                                        |
| hsa-miR-1973    | 5.93x10 <sup>-1</sup> | -0.2200                                                                        |
| hsa-miR-425-3p  | 1.64x10 <sup>-1</sup> | -0.2215                                                                        |
| hsa-miR-221-5p  | 1.23x10 <sup>-1</sup> | -0.2253                                                                        |
| hsa-miR-1-3p    | 3.76x10 <sup>-1</sup> | -0.2258                                                                        |
| hsa-miR-339-3p  | 3.02x10 <sup>-1</sup> | -0.2264                                                                        |
| hsa-miR-337-3p  | 3.89x10 <sup>-1</sup> | -0.2295                                                                        |
| hsa-miR-151a-5p | 7.26x10 <sup>-2</sup> | -0.2465                                                                        |
| hsa-miR-299-3p  | 3.98x10 <sup>-1</sup> | -0.2466                                                                        |
| hsa-miR-374b-5p | 1.31x10 <sup>-1</sup> | -0.2620                                                                        |
| hsa-miR-432-5p  | 4.16x10 <sup>-1</sup> | -0.2654                                                                        |
| hsa-miR-199b-3p | 1.50x10 <sup>-1</sup> | -0.2655                                                                        |
| hsa-miR-335-3p  | 2.01x10 <sup>-1</sup> | -0.2691                                                                        |
| hsa-miR-328-3p  | 2.22x10 <sup>-1</sup> | -0.2783                                                                        |
| hsa-miR-628-5p  | 1.42x10 <sup>-1</sup> | -0.2816                                                                        |
| hsa-miR-28-5p   | 1.24x10 <sup>-1</sup> | -0.2821                                                                        |
| hsa-miR-200c-3p | 3.07x10 <sup>-1</sup> | -0.2831                                                                        |
| hsa-miR-374c-5p | 1.81x10 <sup>-1</sup> | -0.2897                                                                        |
| hsa-miR-133a-3p | 2.80x10 <sup>-1</sup> | -0.2912                                                                        |
| hsa-miR-136-5p  | 2.72x10 <sup>-1</sup> | -0.2923                                                                        |
| hsa-miR-491-5p  | 1.14x10 <sup>-1</sup> | -0.3085                                                                        |
| hsa-miR-495-3p  | 2.41x10 <sup>-1</sup> | -0.3178                                                                        |
| hsa-miR-133b    | 2.30x10 <sup>-1</sup> | -0.3197                                                                        |
| hsa-miR-379-5p  | 2.66x10 <sup>-1</sup> | -0.3320                                                                        |
| hsa-miR-671-3p  | 1.19x10 <sup>-1</sup> | -0.3592                                                                        |

Table SVI. Continued.

| miRNA ID        | P-value               | Fold-change in log <sub>2</sub> scale<br>(Poor prognosis VS<br>good prognosis) |
|-----------------|-----------------------|--------------------------------------------------------------------------------|
| hsa-miR-330-3p  | 1.48x10 <sup>-1</sup> | -0.3616                                                                        |
| hsa-miR-431-5p  | 2.51x10 <sup>-1</sup> | -0.3774                                                                        |
| hsa-miR-369-5p  | 1.96x10 <sup>-1</sup> | -0.3795                                                                        |
| hsa-miR-199a-5p | 1.10x10 <sup>-1</sup> | -0.3995                                                                        |
| hsa-miR-487b-3p | 1.83x10 <sup>-1</sup> | -0.3998                                                                        |
| hsa-miR-376b-3p | 1.80x10 <sup>-1</sup> | -0.4037                                                                        |
| hsa-miR-301b-3p | 1.01x10 <sup>-1</sup> | -0.4124                                                                        |
| hsa-miR-33a-5p  | 1.27x10 <sup>-1</sup> | -0.4141                                                                        |
| hsa-miR-369-3p  | 1.93x10 <sup>-1</sup> | -0.4158                                                                        |
| hsa-miR-485-5p  | 1.62x10 <sup>-1</sup> | -0.4230                                                                        |
| hsa-miR-485-3p  | 1.67x10 <sup>-1</sup> | -0.4435                                                                        |
| hsa-miR-625-5p  | 8.59x10 <sup>-2</sup> | -0.4477                                                                        |
| hsa-miR-654-3p  | 1.81x10 <sup>-1</sup> | -0.4663                                                                        |
| hsa-miR-181d-5p | 4.64x10 <sup>-2</sup> | -0.5012                                                                        |
